# Supplementary material for: Causal Inference of Metabolic Syndrome on Calcific Aortic Valve Stenosis: Linkage Disequilibrium Score Regression and Two-Sample, Two-Step Mendelian Randomization Analysis
Source: Research Square preprint supplement (doi:10.21203/rs.3.rs-7141693/v1), 2025-08-22
Supplement: Supplementary file 1 [file 082180f6278ed15c7b57e8e1.xlsx]

## Sheet: MetS step1 result
Exposure	Mediation	method	nsnp	b	se	pval	FDR	FDR_significant
MetS	Acetate levels	Inverse variance weighted	528	-0.0989477	0.0225468	1.14e-05	2.36e-05	TRUE
MetS	Acetone levels	Inverse variance weighted	528	0.0444571	0.0218909	0.0422704	0.0582092	FALSE
MetS	Alanine levels	Inverse variance weighted	528	0.128999	0.0239798	7.47e-08	1.81e-07	TRUE
MetS	Albumin levels	Inverse variance weighted	528	-0.0286933	0.0210161	0.172158	0.213821	FALSE
MetS	Apolipoprotein A-I levels	Inverse variance weighted	528	-0.585947	0.0365684	8.78e-58	1.1e-56	TRUE
MetS	Apolipoprotein B levels	Inverse variance weighted	528	0.384797	0.0336386	2.67e-30	1.63e-29	TRUE
MetS	Ratio of apolipoprotein B to apolipoprotein A1 levels	Inverse variance weighted	528	0.699281	0.0326173	5.78e-102	7.49e-100	TRUE
MetS	3-Hydroxybutyrate levels	Inverse variance weighted	527	-0.0252879	0.0293655	0.389158	0.44361	FALSE
MetS	Citrate levels	Inverse variance weighted	527	-0.106239	0.0254859	3.07e-05	6.07e-05	TRUE
MetS	Conjugated linoleic acid	Inverse variance weighted	528	0.148636	0.030682	1.27e-06	2.83e-06	TRUE
MetS	Ratio of conjugated linoleic acid to total fatty acids	Inverse variance weighted	528	0.0866589	0.0291516	0.00295192	0.0047045	TRUE
MetS	Creatinine levels	Inverse variance weighted	528	0.0749065	0.0236666	0.00155045	0.00255123	TRUE
MetS	Diacylglycerol levels	Inverse variance weighted	529	0.461534	0.0344145	5.21e-41	3.99e-40	TRUE
MetS	Ratio of diacylglycerol to triglycerides	Inverse variance weighted	529	0.216595	0.0277035	5.35e-15	1.88e-14	TRUE
MetS	Docosahexaenoic acid (22:6) levels	Inverse variance weighted	528	-0.00508342	0.0464088	0.912778	0.930643	FALSE
MetS	Ratio of 22:6 docosahexaenoic acid to total fatty acids	Inverse variance weighted	528	-0.195716	0.0425674	4.27e-06	9.06e-06	TRUE
MetS	Esterified cholesterol levels	Inverse variance weighted	528	-0.0892689	0.0342876	0.0092269	0.0140331	TRUE
MetS	Estimated description of fatty acid chain length not actual carbon number	Inverse variance weighted	529	0.327843	0.0283328	5.77e-31	3.6e-30	TRUE
MetS	Omega-3 fatty acids levels	Inverse variance weighted	528	0.0369807	0.0511169	0.469401	0.524307	FALSE
MetS	Ratio of omega-3 fatty acids to total fatty acids	Inverse variance weighted	528	-0.216559	0.0549999	8.24e-05	0.000156254	TRUE
MetS	Omega-6 fatty acids levels	Inverse variance weighted	528	0.0443976	0.0353923	0.209682	0.255255	FALSE
MetS	Ratio of omega-6 fatty acids to total fatty acids	Inverse variance weighted	528	-0.497208	0.0266649	1.35e-77	3.02e-76	TRUE
MetS	Free cholesterol levels	Inverse variance weighted	528	-0.0775328	0.0338453	0.021975	0.0319213	TRUE
MetS	Glucose levels	Inverse variance weighted	528	0.247707	0.0246545	9.46e-24	4.81e-23	TRUE
MetS	Glutamine levels	Inverse variance weighted	528	-0.152978	0.0232042	4.32e-11	1.27e-10	TRUE
MetS	Glycerol levels	Inverse variance weighted	526	0.310133	0.0346323	3.4e-19	1.49e-18	TRUE
MetS	Glycine levels	Inverse variance weighted	528	-0.0911503	0.0287561	0.00152558	0.00251387	TRUE
MetS	Glycoprotein acetylation	Inverse variance weighted	528	0.553309	0.025758	2.34e-102	3.9e-100	TRUE
MetS	Total cholesterol in HDL2	Inverse variance weighted	528	-0.815044	0.0365943	6.84e-110	1.99e-107	TRUE
MetS	Total cholesterol in HDL3	Inverse variance weighted	528	-0.292581	0.0299423	1.49e-22	7.34e-22	TRUE
MetS	Total cholesterol levels in HDL	Inverse variance weighted	528	-0.790811	0.0368954	6.46e-102	7.53e-100	TRUE
MetS	Mean diameter of HDL particles	Inverse variance weighted	528	-0.87985	0.0446454	1.86e-86	9.02e-85	TRUE
MetS	Triglyceride levels in HDL	Inverse variance weighted	528	0.345649	0.0393686	1.64e-18	6.86e-18	TRUE
MetS	Histidine levels	Inverse variance weighted	528	0.0103062	0.0210916	0.625098	0.673672	FALSE
MetS	Total Cholesterol in IDL	Inverse variance weighted	528	0.00949824	0.0315554	0.763413	0.797646	FALSE
MetS	Cholesteryl esters to total lipids ratio in IDL	Inverse variance weighted	528	-0.31396	0.0325098	4.57e-22	2.22e-21	TRUE
MetS	Cholesterol esters in IDL	Inverse variance weighted	528	0.0496091	0.0314191	0.114348	0.148347	FALSE
MetS	Cholesteryl esters to total lipids ratio in IDL	Inverse variance weighted	528	-0.0367709	0.0292205	0.20825	0.254043	FALSE
MetS	Free cholesterol in IDL	Inverse variance weighted	528	-0.0893757	0.0315942	0.00467129	0.0073343	TRUE
MetS	Free cholesterol to total lipids ratio in IDL	Inverse variance weighted	528	-0.654908	0.0310733	1.32e-98	1.02e-96	TRUE
MetS	Total lipids in IDL	Inverse variance weighted	528	0.066497	0.0321465	0.0385873	0.0535169	FALSE
MetS	Concentration of IDL particles	Inverse variance weighted	528	0.0961804	0.0324639	0.00304969	0.00485367	TRUE
MetS	Phospholipids in IDL	Inverse variance weighted	528	0.0282194	0.0311157	0.364451	0.417899	FALSE
MetS	Phospholipids to total lipids ratio in IDL	Inverse variance weighted	528	-0.326494	0.0316775	6.56e-25	3.44e-24	TRUE
MetS	Triglycerides in IDL	Inverse variance weighted	528	0.437534	0.0395809	2.09e-28	1.24e-27	TRUE
MetS	Triglycerides to total lipids ratio in IDL	Inverse variance weighted	528	0.424442	0.034304	3.66e-35	2.47e-34	TRUE
MetS	Isoleucine levels	Inverse variance weighted	528	0.479127	0.0234967	2e-92	1.37e-90	TRUE
MetS	Linoleic acid (18:2) levels	Inverse variance weighted	528	0.0752294	0.036736	0.0405757	0.0562077	FALSE
MetS	Ratio of 18:2 linoleic acid to total fatty acids	Inverse variance weighted	528	-0.345436	0.0394167	1.89e-18	7.86e-18	TRUE
MetS	Lactate levels	Inverse variance weighted	528	0.127948	0.0204418	3.87e-10	1.06e-09	TRUE
MetS	Total cholesterol levels in LDL	Inverse variance weighted	528	0.0438511	0.0295182	0.137395	0.174934	FALSE
MetS	Mean diameter of LDL particles	Inverse variance weighted	528	-0.058936	0.0309583	0.0569467	0.0767858	FALSE
MetS	Triglyceride levels in LDL	Inverse variance weighted	528	0.321503	0.0372575	6.18e-18	2.51e-17	TRUE
MetS	Leucine levels	Inverse variance weighted	528	0.383979	0.022535	4.2e-65	6.28e-64	TRUE
MetS	Total cholesterol in large HDL	Inverse variance weighted	528	-0.855934	0.0388238	1.03e-107	2.4e-105	TRUE
MetS	Total cholesterol to total lipids ratio in large HDL	Inverse variance weighted	528	-0.671788	0.0316985	1.11e-99	9.92e-98	TRUE
MetS	Cholesterol esters in large HDL	Inverse variance weighted	528	-0.849228	0.0388459	6.05e-106	1.17e-103	TRUE
MetS	Cholesteryl esters to total lipids ratio in large HDL	Inverse variance weighted	528	-0.51467	0.029755	4.96e-67	7.61e-66	TRUE
MetS	Free cholesterol in large HDL	Inverse variance weighted	528	-0.868292	0.0385289	1.84e-112	7.14e-110	TRUE
MetS	Free cholesterol to total lipids ratio in large HDL	Inverse variance weighted	528	-0.733467	0.030432	2.39e-128	2.79e-125	TRUE
MetS	Total lipids in large HDL	Inverse variance weighted	528	-0.834465	0.0388984	4.34e-102	6.31e-100	TRUE
MetS	Concentration of large HDL particles	Inverse variance weighted	528	-0.827097	0.0389835	6.72e-100	6.52e-98	TRUE
MetS	Phospholipids in large HDL	Inverse variance weighted	528	-0.812771	0.0380196	2.16e-101	2.28e-99	TRUE
MetS	Phospholipids to total lipids ratio in large HDL	Inverse variance weighted	528	0.540134	0.0380309	8.84e-46	7.57e-45	TRUE
MetS	Triglycerides in large HDL	Inverse variance weighted	528	-0.365397	0.0419624	3.1e-18	1.28e-17	TRUE
MetS	Triglycerides to total lipids ratio in large HDL	Inverse variance weighted	528	0.487443	0.0318998	1.03e-52	1.08e-51	TRUE
MetS	Total cholesterol in large LDL	Inverse variance weighted	528	0.0361477	0.0300727	0.22936	0.275753	FALSE
MetS	Total cholesterol to total lipids ratio in large LDL	Inverse variance weighted	528	-0.179935	0.0309624	6.19e-09	1.6e-08	TRUE
MetS	Cholesterol esters in large LDL	Inverse variance weighted	528	0.0667903	0.030202	0.0270044	0.0384598	TRUE
MetS	Cholesteryl esters to total lipids ratio in large LDL	Inverse variance weighted	528	0.065244	0.029601	0.0275163	0.039141	TRUE
MetS	Free cholesterol in large LDL	Inverse variance weighted	528	-0.0596854	0.0299063	0.0459613	0.062699	FALSE
MetS	Free cholesterol to total lipids ratio in large LDL	Inverse variance weighted	528	-0.617085	0.0344706	1.14e-71	2.02e-70	TRUE
MetS	Total lipids in large LDL	Inverse variance weighted	528	0.0684732	0.0305878	0.0251832	0.0361756	TRUE
MetS	Concentration of large LDL particles	Inverse variance weighted	528	0.0863907	0.0307896	0.00501863	0.0078374	TRUE
MetS	Phospholipids in large LDL	Inverse variance weighted	528	0.0569193	0.0305075	0.0620771	0.0832274	FALSE
MetS	Phospholipids to total lipids ratio in large LDL	Inverse variance weighted	528	-0.121396	0.0305393	7.04e-05	0.00013482	TRUE
MetS	Triglycerides in large LDL	Inverse variance weighted	528	0.305685	0.0379248	7.61e-16	2.82e-15	TRUE
MetS	Triglycerides to total lipids ratio in large LDL	Inverse variance weighted	528	0.295795	0.0348833	2.26e-17	8.87e-17	TRUE
MetS	Total Cholesterol in large VLDL	Inverse variance weighted	528	0.663414	0.0344092	7.89e-83	2.42e-81	TRUE
MetS	Total cholesterol to total lipids ratio in large VLDL	Inverse variance weighted	528	-0.11891	0.0272815	1.31e-05	2.67e-05	TRUE
MetS	Cholesterol esters in large VLDL	Inverse variance weighted	528	0.66118	0.0344124	2.86e-82	8.12e-81	TRUE
MetS	Cholesteryl esters to total lipids ratio in large VLDL	Inverse variance weighted	528	-0.266535	0.0273649	2.04e-22	9.96e-22	TRUE
MetS	Free cholesterol in large VLDL	Inverse variance weighted	528	0.649594	0.0341002	6.63e-81	1.75e-79	TRUE
MetS	Free cholesterol to total lipids ratio in large VLDL	Inverse variance weighted	528	0.252082	0.0272355	2.13e-20	9.88e-20	TRUE
MetS	Total lipids in large VLDL	Inverse variance weighted	528	0.681655	0.0346084	2.32e-86	1.08e-84	TRUE
MetS	Concentration of large VLDL particles	Inverse variance weighted	528	0.684322	0.0346264	6.2e-87	3.28e-85	TRUE
MetS	Phospholipids in large VLDL	Inverse variance weighted	528	0.673285	0.0345714	1.78e-84	7.16e-83	TRUE
MetS	Phospholipids to total lipids ratio in large VLDL	Inverse variance weighted	528	-0.00408326	0.0257555	0.874032	0.897134	FALSE
MetS	Triglycerides in large VLDL	Inverse variance weighted	528	0.687099	0.0345974	9.06e-88	5.03e-86	TRUE
MetS	Triglycerides to total lipids ratio in large VLDL	Inverse variance weighted	528	0.107732	0.029885	0.000312289	0.000560581	TRUE
MetS	Total cholesterol levels in medium HDL	Inverse variance weighted	528	-0.459924	0.0343266	6.17e-41	4.7e-40	TRUE
MetS	Total cholesterol to total lipids ratio in medium HDL	Inverse variance weighted	528	-0.564618	0.0332333	9.82e-65	1.43e-63	TRUE
MetS	Cholesterol esters in medium HDL	Inverse variance weighted	528	-0.463483	0.0343638	1.85e-41	1.44e-40	TRUE
MetS	Cholesteryl esters to total lipids ratio in medium HDL	Inverse variance weighted	528	-0.505933	0.0356025	7.87e-46	6.79e-45	TRUE
MetS	Free cholesterol in medium HDL	Inverse variance weighted	528	-0.426223	0.0340418	5.76e-36	3.95e-35	TRUE
MetS	Free cholesterol to total lipids ratio in medium HDL	Inverse variance weighted	528	-0.500265	0.0288434	2.18e-67	3.44e-66	TRUE
MetS	Total lipids in medium HDL	Inverse variance weighted	528	-0.367537	0.0350438	9.81e-26	5.22e-25	TRUE
MetS	Concentration of medium HDL particles	Inverse variance weighted	528	-0.339581	0.035132	4.21e-22	2.05e-21	TRUE
MetS	Phospholipids in medium HDL	Inverse variance weighted	528	-0.348489	0.0352983	5.47e-23	2.75e-22	TRUE
MetS	Phospholipids to total lipids ratio in medium HDL	Inverse variance weighted	528	0.265602	0.0298902	6.34e-19	2.72e-18	TRUE
MetS	Triglycerides in medium HDL	Inverse variance weighted	528	0.516801	0.0367999	8.44e-45	7.12e-44	TRUE
MetS	Triglycerides to total lipids ratio in medium HDL	Inverse variance weighted	528	0.693453	0.0327826	2.58e-99	2.15e-97	TRUE
MetS	Total cholesterol in medium LDL	Inverse variance weighted	528	0.0604468	0.028771	0.0356444	0.049672	TRUE
MetS	Total cholesterol to total lipids ratio in medium LDL	Inverse variance weighted	528	-0.15179	0.0275719	3.69e-08	9.18e-08	TRUE
MetS	Cholesterol esters in medium LDL	Inverse variance weighted	528	0.0626195	0.0286643	0.0289194	0.0408873	TRUE
MetS	Cholesteryl esters to total lipids ratio in medium LDL	Inverse variance weighted	528	-0.0345232	0.0266727	0.195552	0.239809	FALSE
MetS	Free cholesterol in medium LDL	Inverse variance weighted	528	0.0478074	0.029016	0.0994301	0.130741	FALSE
MetS	Free cholesterol to total lipids ratio in medium LDL	Inverse variance weighted	528	-0.241875	0.0296374	3.32e-16	1.26e-15	TRUE
MetS	Total lipid levels in medium LDL	Inverse variance weighted	528	0.106622	0.0296318	0.000320383	0.000572463	TRUE
MetS	Concentration of medium LDL particles	Inverse variance weighted	528	0.119995	0.0298006	5.66e-05	0.00010916	TRUE
MetS	Phospholipids in medium LDL	Inverse variance weighted	528	0.182924	0.0312711	4.93e-09	1.28e-08	TRUE
MetS	Phospholipids to total lipids ratio in medium LDL	Inverse variance weighted	528	0.0486934	0.026472	0.0658521	0.0879213	FALSE
MetS	Triglycerides in medium LDL	Inverse variance weighted	528	0.260973	0.0354505	1.82e-13	6.04e-13	TRUE
MetS	Triglycerides to total lipids ratio in medium LDL	Inverse variance weighted	528	0.211887	0.0331385	1.62e-10	4.61e-10	TRUE
MetS	Monounsaturated fatty acids (16:1, 18:1) levels	Inverse variance weighted	528	0.453593	0.0352293	6.19e-38	4.38e-37	TRUE
MetS	Ratio of monounsaturated fatty acids to total fatty acids	Inverse variance weighted	528	0.592587	0.035225	1.66e-63	2.39e-62	TRUE
MetS	Total cholesterol in medium VLDL	Inverse variance weighted	528	0.628938	0.0358203	5.15e-69	8.7e-68	TRUE
MetS	Total cholesterol to total lipids ratio in medium VLDL	Inverse variance weighted	528	-0.36175	0.0343122	5.48e-26	2.93e-25	TRUE
MetS	Cholesterol esters in medium VLDL	Inverse variance weighted	528	0.56059	0.0352035	4.3e-57	5.16e-56	TRUE
MetS	Cholesteryl esters to total lipids ratio in medium VLDL	Inverse variance weighted	528	-0.461348	0.0348885	6.42e-40	4.76e-39	TRUE
MetS	Free cholesterol in medium VLDL	Inverse variance weighted	528	0.691446	0.0366159	1.55e-79	3.77e-78	TRUE
MetS	Free cholesterol to total lipids ratio in medium VLDL	Inverse variance weighted	528	0.341539	0.0334875	2e-24	1.05e-23	TRUE
MetS	Total lipids in medium VLDL	Inverse variance weighted	528	0.710254	0.0363687	6.19e-85	2.67e-83	TRUE
MetS	Concentration of medium VLDL particles	Inverse variance weighted	528	0.716071	0.0364019	3.8e-86	1.7e-84	TRUE
MetS	Phospholipids in medium VLDL	Inverse variance weighted	528	0.70667	0.0364721	1.24e-83	4.51e-82	TRUE
MetS	Phospholipids to total lipids ratio in medium VLDL	Inverse variance weighted	528	-0.401313	0.0286924	1.88e-44	1.56e-43	TRUE
MetS	Triglycerides in medium VLDL	Inverse variance weighted	528	0.735237	0.0366773	2.18e-89	1.41e-87	TRUE
MetS	Triglycerides to total lipids ratio in medium VLDL	Inverse variance weighted	528	0.390636	0.0344083	7.17e-30	4.37e-29	TRUE
MetS	Phosphatidylcholine and other choline levels	Inverse variance weighted	528	-0.168443	0.0374323	6.8e-06	1.43e-05	TRUE
MetS	Phenylalanine levels	Inverse variance weighted	528	0.272567	0.0205469	3.67e-40	2.74e-39	TRUE
MetS	Polyunsaturated fatty acids	Inverse variance weighted	528	0.0454981	0.0372264	0.221633	0.26729	FALSE
MetS	Ratio of polyunsaturated fatty acids to total fatty acids	Inverse variance weighted	528	-0.51372	0.0285033	1.28e-72	2.37e-71	TRUE
MetS	Pyruvate levels	Inverse variance weighted	527	0.148846	0.0221834	1.95e-11	5.85e-11	TRUE
MetS	Remnant cholesterol (non-HDL, non-LDL -cholesterol)	Inverse variance weighted	528	0.359466	0.0336914	1.42e-26	7.75e-26	TRUE
MetS	Serum total cholesterol levels	Inverse variance weighted	528	-0.0888158	0.0343137	0.00964368	0.0146478	TRUE
MetS	Serum total triglyceride levels	Inverse variance weighted	528	0.689492	0.0369716	1.28e-77	2.92e-76	TRUE
MetS	Saturated fatty acids	Inverse variance weighted	528	0.248841	0.0352367	1.64e-12	5.25e-12	TRUE
MetS	Ratio of saturated fatty acids to total fatty acids	Inverse variance weighted	528	-0.0271855	0.0242771	0.2628	0.311774	FALSE
MetS	Total cholesterol levels in small HDL	Inverse variance weighted	528	-0.0431257	0.0297325	0.146931	0.185656	FALSE
MetS	Total cholesterol to total lipids ratio in small HDL	Inverse variance weighted	528	-0.210517	0.0261454	8.16e-16	3.01e-15	TRUE
MetS	Cholesterol esters in small HDL	Inverse variance weighted	528	-0.0556706	0.0272813	0.0412893	0.0571284	FALSE
MetS	Cholesteryl esters to total lipids ratio in small HDL	Inverse variance weighted	528	-0.164362	0.0259404	2.36e-10	6.6e-10	TRUE
MetS	Free cholesterol in small HDL	Inverse variance weighted	528	0.0437867	0.0359349	0.223033	0.268701	FALSE
MetS	Free cholesterol to total lipids ratio in small HDL	Inverse variance weighted	528	-0.146893	0.023968	8.86e-10	2.38e-09	TRUE
MetS	Total lipids in small HDL	Inverse variance weighted	528	0.132536	0.0367752	0.000313423	0.00056175	TRUE
MetS	Concentration of small HDL particles	Inverse variance weighted	528	0.172394	0.0372215	3.63e-06	7.77e-06	TRUE
MetS	Phospholipids in small HDL	Inverse variance weighted	528	0.115632	0.0383103	0.00254195	0.00408466	TRUE
MetS	Phospholipids to total lipids ratio in small HDL	Inverse variance weighted	528	-0.019624	0.0252583	0.437198	0.492808	FALSE
MetS	Triglycerides in small HDL	Inverse variance weighted	528	0.731186	0.0358085	1.13e-92	8.2e-91	TRUE
MetS	Triglycerides to total lipids ratio in small HDL	Inverse variance weighted	528	0.666438	0.0345333	5.54e-83	1.74e-81	TRUE
MetS	Total Cholesterol in small LDL	Inverse variance weighted	528	0.0303342	0.0290872	0.297008	0.348103	FALSE
MetS	Total cholesterol to total lipids ratio in small LDL	Inverse variance weighted	528	-0.154122	0.0275735	2.28e-08	5.75e-08	TRUE
MetS	Cholesterol esters in small LDL	Inverse variance weighted	528	0.0284561	0.0289284	0.325275	0.37706	FALSE
MetS	Cholesteryl esters to total lipids ratio in small LDL	Inverse variance weighted	528	-0.0680243	0.0270923	0.0120446	0.0181057	TRUE
MetS	Free cholesterol in small LDL	Inverse variance weighted	528	0.0362674	0.0295792	0.220157	0.265785	FALSE
MetS	Free cholesterol to total lipids ratio in small LDL	Inverse variance weighted	528	-0.215634	0.0293481	2.02e-13	6.68e-13	TRUE
MetS	Total lipids in small LDL	Inverse variance weighted	528	0.0855961	0.0302266	0.00462843	0.00727681	TRUE
MetS	Concentration of small LDL particles	Inverse variance weighted	528	0.101015	0.0304599	0.0009121	0.00155806	TRUE
MetS	Phospholipids in small LDL	Inverse variance weighted	528	0.107915	0.0321683	0.000794553	0.00136326	TRUE
MetS	Phospholipids to total lipids ratio in small LDL	Inverse variance weighted	528	-0.0540665	0.0265744	0.0418974	0.0578323	FALSE
MetS	Triglycerides in small LDL	Inverse variance weighted	528	0.411288	0.0358511	1.82e-30	1.12e-29	TRUE
MetS	Triglycerides to total lipids ratio in small LDL	Inverse variance weighted	528	0.434887	0.0339802	1.68e-37	1.18e-36	TRUE
MetS	Sphingomyelins levels	Inverse variance weighted	528	-0.216866	0.0323191	1.94e-11	5.85e-11	TRUE
MetS	Total cholesterol in small VLDL	Inverse variance weighted	528	0.503552	0.0343079	8.99e-49	8.31e-48	TRUE
MetS	Total cholesterol to total lipids ratio in small VLDL	Inverse variance weighted	528	-0.442512	0.0330669	7.67e-41	5.8e-40	TRUE
MetS	Cholesterol esters in small VLDL	Inverse variance weighted	528	0.418613	0.032513	6.2e-38	4.38e-37	TRUE
MetS	Cholesteryl esters to total lipids ratio in small VLDL	Inverse variance weighted	528	-0.417479	0.0336402	2.3e-35	1.56e-34	TRUE
MetS	Free cholesterol in small VLDL	Inverse variance weighted	528	0.610632	0.0374506	9.09e-60	1.19e-58	TRUE
MetS	Free cholesterol to total lipids ratio in small VLDL	Inverse variance weighted	528	-0.35071	0.0297249	3.97e-32	2.52e-31	TRUE
MetS	Total lipids in small VLDL	Inverse variance weighted	528	0.671275	0.0373726	3.89e-72	7.08e-71	TRUE
MetS	Concentration of small VLDL particles	Inverse variance weighted	528	0.690135	0.0376506	4.77e-75	9.75e-74	TRUE
MetS	Phospholipids in small VLDL	Inverse variance weighted	528	0.661421	0.0382158	4.13e-67	6.41e-66	TRUE
MetS	Phospholipids to total lipids ratio in small VLDL	Inverse variance weighted	528	-0.428612	0.0314811	3.26e-42	2.61e-41	TRUE
MetS	Triglycerides in small VLDL	Inverse variance weighted	528	0.750694	0.0386529	5.09e-84	1.97e-82	TRUE
MetS	Triglycerides to total lipids ratio in small VLDL	Inverse variance weighted	528	0.554663	0.0349205	8.23e-57	9.78e-56	TRUE
MetS	Ratio of triglycerides to phosphoglycerides	Inverse variance weighted	528	0.798917	0.0344082	2.94e-119	1.71e-116	TRUE
MetS	Total cholines levels	Inverse variance weighted	528	-0.196152	0.0366936	9.01e-08	2.16e-07	TRUE
MetS	Total fatty acids	Inverse variance weighted	528	0.272977	0.0366268	9.13e-14	3.07e-13	TRUE
MetS	Total phosphoglycerides levels	Inverse variance weighted	528	-0.125638	0.0368263	0.000645703	0.00111941	TRUE
MetS	Tyrosine levels	Inverse variance weighted	528	0.22143	0.0271317	3.31e-16	1.26e-15	TRUE
MetS	Estimated degree of unsaturation	Inverse variance weighted	528	-0.457015	0.0570474	1.14e-15	4.14e-15	TRUE
MetS	Valine levels	Inverse variance weighted	528	0.292342	0.0225916	2.67e-38	1.92e-37	TRUE
MetS	Total cholesterol levels in VLDL	Inverse variance weighted	528	0.554807	0.0348318	4.04e-57	4.9e-56	TRUE
MetS	Mean diameter of VLDL particles	Inverse variance weighted	528	0.692011	0.0359043	8.92e-83	2.67e-81	TRUE
MetS	Triglyceride levels in VLDL	Inverse variance weighted	528	0.732349	0.0367695	2.88e-88	1.77e-86	TRUE
MetS	Total cholesterol levels in very large HDL	Inverse variance weighted	528	-0.66154	0.0405696	8.9e-60	1.18e-58	TRUE
MetS	Total cholesterol to total lipids ratio in very large HDL	Inverse variance weighted	528	0.485033	0.0313024	3.74e-54	4.11e-53	TRUE
MetS	Cholesterol esters in very large HDL	Inverse variance weighted	528	-0.623122	0.0396483	1.17e-55	1.32e-54	TRUE
MetS	Cholesteryl esters to total lipids ratio in very large HDL	Inverse variance weighted	528	0.532569	0.0312792	5.24e-65	7.73e-64	TRUE
MetS	Free cholesterol in very large HDL	Inverse variance weighted	528	-0.733456	0.0416242	1.7e-69	2.92e-68	TRUE
MetS	Free cholesterol to total lipids ratio in very large HDL	Inverse variance weighted	528	-0.0804223	0.0219821	0.000253666	0.000460314	TRUE
MetS	Total lipids in very large HDL	Inverse variance weighted	528	-0.781933	0.044624	9.61e-69	1.58e-67	TRUE
MetS	Concentration of very large HDL particles	Inverse variance weighted	528	-0.787038	0.0450581	2.55e-68	4.12e-67	TRUE
MetS	Phospholipids in very large HDL	Inverse variance weighted	528	-0.853136	0.0450758	6.87e-80	1.7e-78	TRUE
MetS	Phospholipids to total lipids ratio in very large HDL	Inverse variance weighted	528	-0.583494	0.030317	1.51e-82	4.4e-81	TRUE
MetS	Triglycerides in very large HDL	Inverse variance weighted	528	-0.0590828	0.0403491	0.143115	0.181622	FALSE
MetS	Triglycerides to total lipids ratio in very large HDL	Inverse variance weighted	528	0.557299	0.0314332	2.48e-70	4.31e-69	TRUE
MetS	Total cholesterol in very large VLDL	Inverse variance weighted	528	0.603344	0.0317845	2.39e-80	6.04e-79	TRUE
MetS	Total cholesterol to total lipids ratio in very large VLDL	Inverse variance weighted	528	-0.310651	0.0277966	5.35e-29	3.2e-28	TRUE
MetS	Cholesterol esters in very large VLDL	Inverse variance weighted	528	0.615703	0.0318878	4.56e-83	1.56e-81	TRUE
MetS	Cholesteryl esters to total lipids ratio in very large VLDL	Inverse variance weighted	528	-0.212537	0.0258511	2.01e-16	7.72e-16	TRUE
MetS	Free cholesterol in very large VLDL	Inverse variance weighted	528	0.580465	0.0315393	1.21e-75	2.56e-74	TRUE
MetS	Free cholesterol to total lipids ratio in very large VLDL	Inverse variance weighted	528	-0.272251	0.0254102	8.73e-27	4.86e-26	TRUE
MetS	Total lipids in very large VLDL	Inverse variance weighted	528	0.625155	0.0323497	3.32e-83	1.17e-81	TRUE
MetS	Concentration of very large VLDL particles	Inverse variance weighted	528	0.628251	0.0323676	6.37e-84	2.39e-82	TRUE
MetS	Phospholipids in very large VLDL	Inverse variance weighted	528	0.597408	0.032033	1.27e-77	2.92e-76	TRUE
MetS	Phospholipids to total lipids ratio in very large VLDL	Inverse variance weighted	528	-0.0607201	0.0255067	0.0172865	0.0255568	TRUE
MetS	Triglycerides in very large VLDL	Inverse variance weighted	528	0.63569	0.032632	1.6e-84	6.68e-83	TRUE
MetS	Triglycerides to total lipids ratio in very large VLDL	Inverse variance weighted	528	0.307196	0.0285856	6.15e-27	3.46e-26	TRUE
MetS	Total cholesterol in very small VLDL	Inverse variance weighted	528	0.194807	0.0323898	1.8e-09	4.77e-09	TRUE
MetS	Total cholesterol to total lipids ratio in very small VLDL	Inverse variance weighted	528	-0.404038	0.0322851	6.21e-36	4.23e-35	TRUE
MetS	Cholesterol esters in very small VLDL	Inverse variance weighted	528	0.197463	0.0314632	3.47e-10	9.57e-10	TRUE
MetS	Cholesteryl esters to total lipids ratio in very small VLDL	Inverse variance weighted	528	-0.280546	0.0305174	3.82e-20	1.74e-19	TRUE
MetS	Free cholesterol in very small VLDL	Inverse variance weighted	528	0.169625	0.0332656	3.41e-07	7.84e-07	TRUE
MetS	Free cholesterol to total lipids ratio in very small VLDL	Inverse variance weighted	528	-0.47377	0.0247889	2e-81	5.55e-80	TRUE
MetS	Total lipids in very small VLDL	Inverse variance weighted	528	0.334142	0.0346444	5.17e-22	2.5e-21	TRUE
MetS	Concentration of very small VLDL particles	Inverse variance weighted	528	0.375062	0.0352611	2.01e-26	1.09e-25	TRUE
MetS	Phospholipids in very small VLDL	Inverse variance weighted	528	0.185682	0.0339724	4.61e-08	1.14e-07	TRUE
MetS	Phospholipids to total lipids ratio in very small VLDL	Inverse variance weighted	528	-0.42245	0.0274809	2.5e-53	2.7e-52	TRUE
MetS	Triglycerides in very small VLDL	Inverse variance weighted	528	0.65615	0.039502	5.85e-62	8.21e-61	TRUE
MetS	Triglycerides to total lipids ratio in very small VLDL	Inverse variance weighted	528	0.583099	0.0377197	6.59e-54	7.17e-53	TRUE
MetS	Total cholesterol levels in chylomicrons and extremely large VLDL	Inverse variance weighted	528	0.553624	0.0315878	8.99e-69	1.5e-67	TRUE
MetS	Total cholesterol to total lipids ratio in chylomicrons and extremely large VLDL	Inverse variance weighted	528	0.0217247	0.0312597	0.487072	0.541966	FALSE
MetS	Cholesteryl ester levels in chylomicrons and extremely large VLDL	Inverse variance weighted	528	0.526874	0.0318266	1.48e-61	2.06e-60	TRUE
MetS	Cholesteryl esters to total lipids ratio in chylomicrons and extremely large VLDL	Inverse variance weighted	528	-0.113723	0.0322699	0.00042489	0.000752275	TRUE
MetS	Free cholesterol levels in chylomicrons and extremely large VLDL	Inverse variance weighted	528	0.56956	0.0311977	1.84e-74	3.63e-73	TRUE
MetS	Free cholesterol to total lipids ratio in chylomicrons and extremely large VLDL	Inverse variance weighted	528	0.305305	0.026536	1.24e-30	7.69e-30	TRUE
MetS	Total lipid levels in chylomicrons and extremely large VLDL	Inverse variance weighted	528	0.567182	0.0310988	2.57e-74	5e-73	TRUE
MetS	Concentration of chylomicrons and extremely large VLDL particles	Inverse variance weighted	528	0.568392	0.0310193	5.34e-75	1.07e-73	TRUE
MetS	Phospholipid levels in chylomicrons and extremely large VLDL	Inverse variance weighted	528	0.552115	0.0316996	6.12e-68	9.77e-67	TRUE
MetS	Phospholipids to total lipids ratio in chylomicrons and extremely large VLDL	Inverse variance weighted	528	0.171949	0.0275092	4.09e-10	1.12e-09	TRUE
MetS	Triglyceride levels in chylomicrons and extremely large VLDL	Inverse variance weighted	528	0.569314	0.0308724	6.17e-76	1.36e-74	TRUE
MetS	Triglycerides to total lipids ratio in chylomicrons and extremely large VLDL	Inverse variance weighted	528	-0.0610018	0.0321714	0.0579407	0.0780357	FALSE

## Sheet: WCstep1 result
Exposure	Mediation	method	nsnp	b	se	pval	FDR	FDR_significant
WC	Acetate levels	Inverse variance weighted	298	-0.0521587	0.0202325	0.00993822	0.0198594	TRUE
WC	Acetone levels	Inverse variance weighted	299	0.0286112	0.0193632	0.139514	0.200907	FALSE
WC	Alanine levels	Inverse variance weighted	299	0.0835184	0.0219773	0.000144568	0.000425308	TRUE
WC	Albumin levels	Inverse variance weighted	299	-0.0702189	0.0201834	0.000503215	0.00133846	TRUE
WC	Apolipoprotein A-I levels	Inverse variance weighted	299	-0.241124	0.0248549	2.98e-22	6.94e-21	TRUE
WC	Apolipoprotein B levels	Inverse variance weighted	299	0.111499	0.0444836	0.0121929	0.0235958	TRUE
WC	Ratio of apolipoprotein B to apolipoprotein A1 levels	Inverse variance weighted	299	0.246967	0.0446766	3.24e-08	1.7e-07	TRUE
WC	3-Hydroxybutyrate levels	Inverse variance weighted	299	-0.00390941	0.0273091	0.886169	0.911197	FALSE
WC	Citrate levels	Inverse variance weighted	298	-0.0675281	0.0248711	0.00662509	0.0140077	TRUE
WC	Conjugated linoleic acid	Inverse variance weighted	300	0.0808133	0.0277719	0.00361556	0.00822682	TRUE
WC	Ratio of conjugated linoleic acid to total fatty acids	Inverse variance weighted	300	0.0754423	0.0246072	0.00217042	0.00520275	TRUE
WC	Creatinine levels	Inverse variance weighted	299	0.023674	0.0229097	0.301434	0.380055	FALSE
WC	Diacylglycerol levels	Inverse variance weighted	300	0.124558	0.0307783	5.19e-05	0.000160786	TRUE
WC	Ratio of diacylglycerol to triglycerides	Inverse variance weighted	300	0.0450263	0.0249265	0.0708621	0.110514	FALSE
WC	Docosahexaenoic acid (22:6) levels	Inverse variance weighted	299	0.0200535	0.0248546	0.419763	0.502078	FALSE
WC	Ratio of 22:6 docosahexaenoic acid to total fatty acids	Inverse variance weighted	299	-0.0255806	0.0209418	0.221893	0.293422	FALSE
WC	Esterified cholesterol levels	Inverse variance weighted	299	-0.0614484	0.0399425	0.123945	0.18278	FALSE
WC	Estimated description of fatty acid chain length not actual carbon number	Inverse variance weighted	300	0.192915	0.030751	3.53e-10	2.25e-09	TRUE
WC	Omega-3 fatty acids levels	Inverse variance weighted	299	0.0227522	0.0275645	0.409135	0.490877	FALSE
WC	Ratio of omega-3 fatty acids to total fatty acids	Inverse variance weighted	299	-0.0333498	0.0202446	0.0994879	0.15072	FALSE
WC	Omega-6 fatty acids levels	Inverse variance weighted	299	-0.0376026	0.0378983	0.321101	0.401376	FALSE
WC	Ratio of omega-6 fatty acids to total fatty acids	Inverse variance weighted	299	-0.220252	0.0224359	9.52e-23	2.46e-21	TRUE
WC	Free cholesterol levels	Inverse variance weighted	299	-0.0518996	0.0373662	0.164849	0.230167	FALSE
WC	Glucose levels	Inverse variance weighted	299	0.128283	0.0240016	9.05e-08	4.41e-07	TRUE
WC	Glutamine levels	Inverse variance weighted	299	-0.126881	0.0210698	1.72e-09	1.04e-08	TRUE
WC	Glycerol levels	Inverse variance weighted	295	0.219116	0.0340952	1.3e-10	8.59e-10	TRUE
WC	Glycine levels	Inverse variance weighted	299	-0.0492028	0.0232651	0.0344409	0.0584892	FALSE
WC	Glycoprotein acetylation	Inverse variance weighted	299	0.29871	0.0249407	4.7e-33	3.65e-31	TRUE
WC	Total cholesterol in HDL2	Inverse variance weighted	299	-0.315473	0.0293	4.93e-27	1.85e-25	TRUE
WC	Total cholesterol in HDL3	Inverse variance weighted	299	-0.124515	0.0219351	1.37e-08	7.41e-08	TRUE
WC	Total cholesterol levels in HDL	Inverse variance weighted	299	-0.307165	0.0281889	1.2e-27	4.98e-26	TRUE
WC	Mean diameter of HDL particles	Inverse variance weighted	299	-0.329055	0.0271365	7.7e-34	6.9e-32	TRUE
WC	Triglyceride levels in HDL	Inverse variance weighted	299	0.116725	0.0241503	1.34e-06	5.4e-06	TRUE
WC	Histidine levels	Inverse variance weighted	299	0.000284723	0.0209228	0.989142	0.991696	FALSE
WC	Total Cholesterol in IDL	Inverse variance weighted	299	-0.0130328	0.0428729	0.761137	0.815004	FALSE
WC	Cholesteryl esters to total lipids ratio in IDL	Inverse variance weighted	299	-0.130954	0.0265202	7.9e-07	3.42e-06	TRUE
WC	Cholesterol esters in IDL	Inverse variance weighted	299	0.001748	0.0430616	0.96762	0.975127	FALSE
WC	Cholesteryl esters to total lipids ratio in IDL	Inverse variance weighted	299	-0.0156347	0.0238496	0.512113	0.589537	FALSE
WC	Free cholesterol in IDL	Inverse variance weighted	299	-0.0516449	0.0415001	0.213333	0.284038	FALSE
WC	Free cholesterol to total lipids ratio in IDL	Inverse variance weighted	299	-0.258551	0.0241425	9.2e-27	3.35e-25	TRUE
WC	Total lipids in IDL	Inverse variance weighted	299	0.00944343	0.0431855	0.826906	0.869445	FALSE
WC	Concentration of IDL particles	Inverse variance weighted	299	0.0209234	0.0431564	0.627799	0.700561	FALSE
WC	Phospholipids in IDL	Inverse variance weighted	299	-0.00774894	0.0430815	0.857257	0.889318	FALSE
WC	Phospholipids to total lipids ratio in IDL	Inverse variance weighted	299	-0.128238	0.0257577	6.4e-07	2.8e-06	TRUE
WC	Triglycerides in IDL	Inverse variance weighted	299	0.162033	0.0329228	8.58e-07	3.69e-06	TRUE
WC	Triglycerides to total lipids ratio in IDL	Inverse variance weighted	299	0.176301	0.0250403	1.91e-12	1.45e-11	TRUE
WC	Isoleucine levels	Inverse variance weighted	299	0.230008	0.0225273	1.79e-24	5.47e-23	TRUE
WC	Linoleic acid (18:2) levels	Inverse variance weighted	299	-0.0588374	0.0388785	0.130187	0.190777	FALSE
WC	Ratio of 18:2 linoleic acid to total fatty acids	Inverse variance weighted	299	-0.22227	0.0223391	2.53e-23	6.69e-22	TRUE
WC	Lactate levels	Inverse variance weighted	299	0.0690877	0.0208265	0.000908939	0.00232729	TRUE
WC	Total cholesterol levels in LDL	Inverse variance weighted	299	-0.01115	0.0463766	0.810003	0.855533	FALSE
WC	Mean diameter of LDL particles	Inverse variance weighted	299	0.0379686	0.0305304	0.213634	0.284114	FALSE
WC	Triglyceride levels in LDL	Inverse variance weighted	299	0.119785	0.0334756	0.000345844	0.000950254	TRUE
WC	Leucine levels	Inverse variance weighted	299	0.205155	0.0222443	2.89e-20	5.04e-19	TRUE
WC	Total cholesterol in large HDL	Inverse variance weighted	299	-0.327482	0.0312318	1.01e-25	3.55e-24	TRUE
WC	Total cholesterol to total lipids ratio in large HDL	Inverse variance weighted	299	-0.267267	0.0274963	2.48e-22	5.88e-21	TRUE
WC	Cholesterol esters in large HDL	Inverse variance weighted	299	-0.323394	0.0315367	1.13e-24	3.66e-23	TRUE
WC	Cholesteryl esters to total lipids ratio in large HDL	Inverse variance weighted	299	-0.200425	0.0276042	3.85e-13	3.05e-12	TRUE
WC	Free cholesterol in large HDL	Inverse variance weighted	299	-0.336241	0.0301038	5.76e-29	3.53e-27	TRUE
WC	Free cholesterol to total lipids ratio in large HDL	Inverse variance weighted	299	-0.299407	0.0236243	8.27e-37	2.78e-34	TRUE
WC	Total lipids in large HDL	Inverse variance weighted	299	-0.317309	0.0307708	6.22e-25	2.13e-23	TRUE
WC	Concentration of large HDL particles	Inverse variance weighted	299	-0.314301	0.0307293	1.49e-24	4.68e-23	TRUE
WC	Phospholipids in large HDL	Inverse variance weighted	299	-0.305975	0.0304942	1.08e-23	3.07e-22	TRUE
WC	Phospholipids to total lipids ratio in large HDL	Inverse variance weighted	299	0.240432	0.023989	1.21e-23	3.36e-22	TRUE
WC	Triglycerides in large HDL	Inverse variance weighted	299	-0.145016	0.0213489	1.1e-11	7.82e-11	TRUE
WC	Triglycerides to total lipids ratio in large HDL	Inverse variance weighted	299	0.178982	0.0259068	4.89e-12	3.63e-11	TRUE
WC	Total cholesterol in large LDL	Inverse variance weighted	299	-0.0118856	0.0457337	0.79495	0.84269	FALSE
WC	Total cholesterol to total lipids ratio in large LDL	Inverse variance weighted	299	-0.102058	0.0408271	0.0124278	0.0239313	TRUE
WC	Cholesterol esters in large LDL	Inverse variance weighted	299	-0.00187433	0.0461388	0.967596	0.975127	FALSE
WC	Cholesteryl esters to total lipids ratio in large LDL	Inverse variance weighted	299	-0.0119576	0.0444341	0.787846	0.838025	FALSE
WC	Free cholesterol in large LDL	Inverse variance weighted	299	-0.0449879	0.044138	0.308082	0.386956	FALSE
WC	Free cholesterol to total lipids ratio in large LDL	Inverse variance weighted	299	-0.224161	0.0323127	4e-12	2.99e-11	TRUE
WC	Total lipids in large LDL	Inverse variance weighted	299	0.00157056	0.0453801	0.972391	0.978269	FALSE
WC	Concentration of large LDL particles	Inverse variance weighted	299	0.00918889	0.0452699	0.839151	0.876781	FALSE
WC	Phospholipids in large LDL	Inverse variance weighted	299	-0.00391422	0.0445921	0.930053	0.948784	FALSE
WC	Phospholipids to total lipids ratio in large LDL	Inverse variance weighted	299	-0.0295808	0.0440799	0.502174	0.580389	FALSE
WC	Triglycerides in large LDL	Inverse variance weighted	299	0.117362	0.0328269	0.000349978	0.000959351	TRUE
WC	Triglycerides to total lipids ratio in large LDL	Inverse variance weighted	299	0.139643	0.0258918	6.92e-08	3.46e-07	TRUE
WC	Total Cholesterol in large VLDL	Inverse variance weighted	299	0.22914	0.0290365	2.99e-15	2.92e-14	TRUE
WC	Total cholesterol to total lipids ratio in large VLDL	Inverse variance weighted	299	-0.0399786	0.0201196	0.0469169	0.076875	FALSE
WC	Cholesterol esters in large VLDL	Inverse variance weighted	299	0.228679	0.0293668	6.86e-15	6.5e-14	TRUE
WC	Cholesteryl esters to total lipids ratio in large VLDL	Inverse variance weighted	299	-0.095498	0.0197561	1.34e-06	5.4e-06	TRUE
WC	Free cholesterol in large VLDL	Inverse variance weighted	299	0.22559	0.0284371	2.14e-15	2.13e-14	TRUE
WC	Free cholesterol to total lipids ratio in large VLDL	Inverse variance weighted	299	0.100082	0.0233013	1.75e-05	5.79e-05	TRUE
WC	Total lipids in large VLDL	Inverse variance weighted	299	0.23527	0.028484	1.46e-16	1.67e-15	TRUE
WC	Concentration of large VLDL particles	Inverse variance weighted	299	0.236629	0.0283484	6.99e-17	8.4e-16	TRUE
WC	Phospholipids in large VLDL	Inverse variance weighted	299	0.233737	0.0290802	9.16e-16	9.44e-15	TRUE
WC	Phospholipids to total lipids ratio in large VLDL	Inverse variance weighted	299	0.0238269	0.0269029	0.375799	0.458916	FALSE
WC	Triglycerides in large VLDL	Inverse variance weighted	299	0.237194	0.0279256	2e-17	2.48e-16	TRUE
WC	Triglycerides to total lipids ratio in large VLDL	Inverse variance weighted	299	0.0375626	0.0221734	0.0902583	0.138175	FALSE
WC	Total cholesterol levels in medium HDL	Inverse variance weighted	299	-0.186302	0.0294778	2.61e-10	1.68e-09	TRUE
WC	Total cholesterol to total lipids ratio in medium HDL	Inverse variance weighted	299	-0.228933	0.0278722	2.15e-16	2.43e-15	TRUE
WC	Cholesterol esters in medium HDL	Inverse variance weighted	299	-0.18824	0.0300886	3.94e-10	2.48e-09	TRUE
WC	Cholesteryl esters to total lipids ratio in medium HDL	Inverse variance weighted	299	-0.201256	0.0283879	1.35e-12	1.03e-11	TRUE
WC	Free cholesterol in medium HDL	Inverse variance weighted	299	-0.171131	0.0270191	2.39e-10	1.55e-09	TRUE
WC	Free cholesterol to total lipids ratio in medium HDL	Inverse variance weighted	299	-0.210341	0.0224816	8.27e-21	1.63e-19	TRUE
WC	Total lipids in medium HDL	Inverse variance weighted	299	-0.146293	0.0284707	2.77e-07	1.29e-06	TRUE
WC	Concentration of medium HDL particles	Inverse variance weighted	299	-0.134896	0.0281861	1.7e-06	6.68e-06	TRUE
WC	Phospholipids in medium HDL	Inverse variance weighted	299	-0.134356	0.0278143	1.36e-06	5.45e-06	TRUE
WC	Phospholipids to total lipids ratio in medium HDL	Inverse variance weighted	299	0.134702	0.0251053	8.07e-08	3.99e-07	TRUE
WC	Triglycerides in medium HDL	Inverse variance weighted	299	0.195674	0.0249497	4.41e-15	4.21e-14	TRUE
WC	Triglycerides to total lipids ratio in medium HDL	Inverse variance weighted	299	0.267711	0.0281467	1.88e-21	4.06e-20	TRUE
WC	Total cholesterol in medium LDL	Inverse variance weighted	299	-0.00838658	0.0466062	0.857195	0.889318	FALSE
WC	Total cholesterol to total lipids ratio in medium LDL	Inverse variance weighted	299	-0.0817055	0.038883	0.0356132	0.0601295	FALSE
WC	Cholesterol esters in medium LDL	Inverse variance weighted	299	-0.0058408	0.0464164	0.899863	0.924462	FALSE
WC	Cholesteryl esters to total lipids ratio in medium LDL	Inverse variance weighted	299	-0.037379	0.0413562	0.366085	0.448936	FALSE
WC	Free cholesterol in medium LDL	Inverse variance weighted	299	-0.0171655	0.0464153	0.711514	0.77324	FALSE
WC	Free cholesterol to total lipids ratio in medium LDL	Inverse variance weighted	299	-0.0781119	0.0407181	0.0550654	0.0883625	FALSE
WC	Total lipid levels in medium LDL	Inverse variance weighted	299	0.00936105	0.0466742	0.841042	0.877969	FALSE
WC	Concentration of medium LDL particles	Inverse variance weighted	299	0.0156187	0.0465213	0.737073	0.795083	FALSE
WC	Phospholipids in medium LDL	Inverse variance weighted	299	0.0322472	0.0461001	0.484238	0.565962	FALSE
WC	Phospholipids to total lipids ratio in medium LDL	Inverse variance weighted	299	0.0354082	0.0405383	0.382418	0.465536	FALSE
WC	Triglycerides in medium LDL	Inverse variance weighted	299	0.100184	0.0325523	0.0020864	0.00501167	TRUE
WC	Triglycerides to total lipids ratio in medium LDL	Inverse variance weighted	299	0.113395	0.0233383	1.18e-06	4.91e-06	TRUE
WC	Monounsaturated fatty acids (16:1, 18:1) levels	Inverse variance weighted	299	0.150973	0.031135	1.24e-06	5.11e-06	TRUE
WC	Ratio of monounsaturated fatty acids to total fatty acids	Inverse variance weighted	299	0.248816	0.0225532	2.67e-28	1.35e-26	TRUE
WC	Total cholesterol in medium VLDL	Inverse variance weighted	299	0.206831	0.0327615	2.73e-10	1.75e-09	TRUE
WC	Total cholesterol to total lipids ratio in medium VLDL	Inverse variance weighted	299	-0.109795	0.0228629	1.57e-06	6.17e-06	TRUE
WC	Cholesterol esters in medium VLDL	Inverse variance weighted	299	0.185389	0.0337886	4.09e-08	2.09e-07	TRUE
WC	Cholesteryl esters to total lipids ratio in medium VLDL	Inverse variance weighted	299	-0.135946	0.0226135	1.84e-09	1.1e-08	TRUE
WC	Free cholesterol in medium VLDL	Inverse variance weighted	299	0.223398	0.0307295	3.6e-13	2.87e-12	TRUE
WC	Free cholesterol to total lipids ratio in medium VLDL	Inverse variance weighted	299	0.0946283	0.0237575	6.8e-05	0.000206913	TRUE
WC	Total lipids in medium VLDL	Inverse variance weighted	299	0.232447	0.031072	7.38e-14	6.32e-13	TRUE
WC	Concentration of medium VLDL particles	Inverse variance weighted	299	0.2345	0.0308117	2.73e-14	2.44e-13	TRUE
WC	Phospholipids in medium VLDL	Inverse variance weighted	299	0.230458	0.0317887	4.18e-13	3.29e-12	TRUE
WC	Phospholipids to total lipids ratio in medium VLDL	Inverse variance weighted	299	-0.131201	0.0204231	1.33e-10	8.68e-10	TRUE
WC	Triglycerides in medium VLDL	Inverse variance weighted	299	0.241899	0.0294666	2.23e-16	2.49e-15	TRUE
WC	Triglycerides to total lipids ratio in medium VLDL	Inverse variance weighted	299	0.131862	0.0223608	3.7e-09	2.17e-08	TRUE
WC	Phosphatidylcholine and other choline levels	Inverse variance weighted	299	-0.0848586	0.0261184	0.00115814	0.00290782	TRUE
WC	Phenylalanine levels	Inverse variance weighted	299	0.251686	0.0206781	4.4e-34	4.27e-32	TRUE
WC	Polyunsaturated fatty acids	Inverse variance weighted	299	-0.0295202	0.0374117	0.430075	0.511887	FALSE
WC	Ratio of polyunsaturated fatty acids to total fatty acids	Inverse variance weighted	299	-0.210658	0.0216317	2.07e-22	5.02e-21	TRUE
WC	Pyruvate levels	Inverse variance weighted	299	0.104281	0.0212562	9.3e-07	3.97e-06	TRUE
WC	Remnant cholesterol (non-HDL, non-LDL -cholesterol)	Inverse variance weighted	299	0.116294	0.0411177	0.00467921	0.0104231	TRUE
WC	Serum total cholesterol levels	Inverse variance weighted	299	-0.0597868	0.0396686	0.13177	0.192301	FALSE
WC	Serum total triglyceride levels	Inverse variance weighted	299	0.230574	0.0311412	1.32e-13	1.11e-12	TRUE
WC	Saturated fatty acids	Inverse variance weighted	299	0.0589175	0.0313135	0.0598987	0.0953306	FALSE
WC	Ratio of saturated fatty acids to total fatty acids	Inverse variance weighted	299	0.00454289	0.0218952	0.835632	0.875465	FALSE
WC	Total cholesterol levels in small HDL	Inverse variance weighted	299	-0.0285624	0.0244451	0.242632	0.316535	FALSE
WC	Total cholesterol to total lipids ratio in small HDL	Inverse variance weighted	299	-0.0856832	0.0354725	0.0157143	0.0293854	TRUE
WC	Cholesterol esters in small HDL	Inverse variance weighted	299	-0.0226369	0.0274174	0.409008	0.490877	FALSE
WC	Cholesteryl esters to total lipids ratio in small HDL	Inverse variance weighted	299	-0.0602106	0.0366203	0.100137	0.151279	FALSE
WC	Free cholesterol in small HDL	Inverse variance weighted	299	-0.00934977	0.0261041	0.720214	0.780945	FALSE
WC	Free cholesterol to total lipids ratio in small HDL	Inverse variance weighted	299	-0.0949079	0.0324218	0.00341936	0.00785711	TRUE
WC	Total lipids in small HDL	Inverse variance weighted	299	0.0429998	0.0202528	0.033741	0.0576368	FALSE
WC	Concentration of small HDL particles	Inverse variance weighted	299	0.0601481	0.0204189	0.0032222	0.00749275	TRUE
WC	Phospholipids in small HDL	Inverse variance weighted	299	0.0381418	0.029173	0.191064	0.259127	FALSE
WC	Phospholipids to total lipids ratio in small HDL	Inverse variance weighted	299	0.00800681	0.0404301	0.843013	0.878453	FALSE
WC	Triglycerides in small HDL	Inverse variance weighted	299	0.27277	0.0273669	2.12e-23	5.75e-22	TRUE
WC	Triglycerides to total lipids ratio in small HDL	Inverse variance weighted	299	0.253254	0.0269455	5.52e-21	1.13e-19	TRUE
WC	Total Cholesterol in small LDL	Inverse variance weighted	299	-0.0204516	0.0466405	0.661028	0.72788	FALSE
WC	Total cholesterol to total lipids ratio in small LDL	Inverse variance weighted	299	-0.0781093	0.0398512	0.049993	0.0811168	FALSE
WC	Cholesterol esters in small LDL	Inverse variance weighted	299	-0.0183037	0.0465474	0.694152	0.758619	FALSE
WC	Cholesteryl esters to total lipids ratio in small LDL	Inverse variance weighted	299	-0.0414247	0.0417357	0.320931	0.401376	FALSE
WC	Free cholesterol in small LDL	Inverse variance weighted	299	-0.0293647	0.0451826	0.515749	0.592552	FALSE
WC	Free cholesterol to total lipids ratio in small LDL	Inverse variance weighted	299	-0.0750688	0.0415289	0.0706643	0.110354	FALSE
WC	Total lipids in small LDL	Inverse variance weighted	299	-0.00234781	0.0467127	0.959915	0.971487	FALSE
WC	Concentration of small LDL particles	Inverse variance weighted	299	0.00442626	0.046586	0.924305	0.944575	FALSE
WC	Phospholipids in small LDL	Inverse variance weighted	299	0.000389938	0.0443927	0.992992	0.994699	FALSE
WC	Phospholipids to total lipids ratio in small LDL	Inverse variance weighted	299	0.0021204	0.0429727	0.960646	0.971487	FALSE
WC	Triglycerides in small LDL	Inverse variance weighted	299	0.138799	0.0340359	4.54e-05	0.000142246	TRUE
WC	Triglycerides to total lipids ratio in small LDL	Inverse variance weighted	299	0.175329	0.0222299	3.09e-15	3e-14	TRUE
WC	Sphingomyelins levels	Inverse variance weighted	299	-0.046714	0.0285948	0.102332	0.153827	FALSE
WC	Total cholesterol in small VLDL	Inverse variance weighted	299	0.174909	0.0361168	1.28e-06	5.23e-06	TRUE
WC	Total cholesterol to total lipids ratio in small VLDL	Inverse variance weighted	299	-0.125768	0.0247822	3.88e-07	1.76e-06	TRUE
WC	Cholesterol esters in small VLDL	Inverse variance weighted	299	0.153767	0.0364054	2.4e-05	7.84e-05	TRUE
WC	Cholesteryl esters to total lipids ratio in small VLDL	Inverse variance weighted	299	-0.108652	0.0253621	1.84e-05	6.06e-05	TRUE
WC	Free cholesterol in small VLDL	Inverse variance weighted	299	0.196666	0.033696	5.33e-09	3.03e-08	TRUE
WC	Free cholesterol to total lipids ratio in small VLDL	Inverse variance weighted	299	-0.154922	0.0196033	2.73e-15	2.69e-14	TRUE
WC	Total lipids in small VLDL	Inverse variance weighted	299	0.221516	0.0340379	7.62e-11	5.07e-10	TRUE
WC	Concentration of small VLDL particles	Inverse variance weighted	299	0.226934	0.0334514	1.17e-11	8.25e-11	TRUE
WC	Phospholipids in small VLDL	Inverse variance weighted	299	0.217383	0.0327745	3.3e-11	2.23e-10	TRUE
WC	Phospholipids to total lipids ratio in small VLDL	Inverse variance weighted	299	-0.153177	0.0316681	1.32e-06	5.33e-06	TRUE
WC	Triglycerides in small VLDL	Inverse variance weighted	299	0.24399	0.0305929	1.52e-15	1.54e-14	TRUE
WC	Triglycerides to total lipids ratio in small VLDL	Inverse variance weighted	299	0.176135	0.0226851	8.21e-15	7.71e-14	TRUE
WC	Ratio of triglycerides to phosphoglycerides	Inverse variance weighted	299	0.287801	0.0280254	9.69e-25	3.23e-23	TRUE
WC	Total cholines levels	Inverse variance weighted	299	-0.0887085	0.0270173	0.00102565	0.00260891	TRUE
WC	Total fatty acids	Inverse variance weighted	299	0.0654725	0.0345913	0.0583917	0.0931867	FALSE
WC	Total phosphoglycerides levels	Inverse variance weighted	299	-0.0787657	0.0263028	0.00274833	0.00648139	TRUE
WC	Tyrosine levels	Inverse variance weighted	299	0.200685	0.0229299	2.09e-18	2.9e-17	TRUE
WC	Estimated degree of unsaturation	Inverse variance weighted	299	-0.106489	0.0212318	5.29e-07	2.34e-06	TRUE
WC	Valine levels	Inverse variance weighted	299	0.206202	0.0232802	8.19e-19	1.21e-17	TRUE
WC	Total cholesterol levels in VLDL	Inverse variance weighted	299	0.192588	0.0360828	9.43e-08	4.58e-07	TRUE
WC	Mean diameter of VLDL particles	Inverse variance weighted	299	0.231633	0.0245278	3.6e-21	7.62e-20	TRUE
WC	Triglyceride levels in VLDL	Inverse variance weighted	299	0.243876	0.0300759	5.12e-16	5.37e-15	TRUE
WC	Total cholesterol levels in very large HDL	Inverse variance weighted	299	-0.249474	0.0229885	1.95e-27	7.83e-26	TRUE
WC	Total cholesterol to total lipids ratio in very large HDL	Inverse variance weighted	299	0.174112	0.0294131	3.23e-09	1.91e-08	TRUE
WC	Cholesterol esters in very large HDL	Inverse variance weighted	299	-0.232942	0.0229144	2.82e-24	8.42e-23	TRUE
WC	Cholesteryl esters to total lipids ratio in very large HDL	Inverse variance weighted	299	0.204725	0.0280704	3.03e-13	2.45e-12	TRUE
WC	Free cholesterol in very large HDL	Inverse variance weighted	299	-0.284134	0.0230858	8.23e-35	1.6e-32	TRUE
WC	Free cholesterol to total lipids ratio in very large HDL	Inverse variance weighted	299	-0.084147	0.0222672	0.000157478	0.000457512	TRUE
WC	Total lipids in very large HDL	Inverse variance weighted	299	-0.290697	0.0237469	1.87e-34	2.03e-32	TRUE
WC	Concentration of very large HDL particles	Inverse variance weighted	299	-0.291706	0.0238197	1.76e-34	2.03e-32	TRUE
WC	Phospholipids in very large HDL	Inverse variance weighted	299	-0.311948	0.0254874	1.92e-34	2.03e-32	TRUE
WC	Phospholipids to total lipids ratio in very large HDL	Inverse variance weighted	299	-0.199607	0.0298195	2.17e-11	1.51e-10	TRUE
WC	Triglycerides in very large HDL	Inverse variance weighted	299	-0.0496397	0.0241876	0.0401422	0.066808	FALSE
WC	Triglycerides to total lipids ratio in very large HDL	Inverse variance weighted	299	0.186839	0.0265678	2.03e-12	1.52e-11	TRUE
WC	Total cholesterol in very large VLDL	Inverse variance weighted	299	0.215601	0.0285761	4.53e-14	3.94e-13	TRUE
WC	Total cholesterol to total lipids ratio in very large VLDL	Inverse variance weighted	299	-0.119185	0.0202823	4.2e-09	2.42e-08	TRUE
WC	Cholesterol esters in very large VLDL	Inverse variance weighted	299	0.217945	0.0284414	1.82e-14	1.67e-13	TRUE
WC	Cholesteryl esters to total lipids ratio in very large VLDL	Inverse variance weighted	299	-0.0979063	0.0203405	1.48e-06	5.86e-06	TRUE
WC	Free cholesterol in very large VLDL	Inverse variance weighted	299	0.209778	0.0285818	2.14e-13	1.75e-12	TRUE
WC	Free cholesterol to total lipids ratio in very large VLDL	Inverse variance weighted	299	-0.0869982	0.0207472	2.75e-05	8.73e-05	TRUE
WC	Total lipids in very large VLDL	Inverse variance weighted	299	0.222495	0.0277162	9.94e-16	1.02e-14	TRUE
WC	Concentration of very large VLDL particles	Inverse variance weighted	299	0.223978	0.0275454	4.25e-16	4.5e-15	TRUE
WC	Phospholipids in very large VLDL	Inverse variance weighted	299	0.214804	0.0283685	3.68e-14	3.22e-13	TRUE
WC	Phospholipids to total lipids ratio in very large VLDL	Inverse variance weighted	299	0.00294389	0.0249705	0.906151	0.930102	FALSE
WC	Triglycerides in very large VLDL	Inverse variance weighted	299	0.22448	0.0271059	1.22e-16	1.4e-15	TRUE
WC	Triglycerides to total lipids ratio in very large VLDL	Inverse variance weighted	299	0.110614	0.0217704	3.76e-07	1.71e-06	TRUE
WC	Total cholesterol in very small VLDL	Inverse variance weighted	299	0.0860031	0.0355827	0.0156495	0.0293113	TRUE
WC	Total cholesterol to total lipids ratio in very small VLDL	Inverse variance weighted	299	-0.113145	0.0200963	1.8e-08	9.67e-08	TRUE
WC	Cholesterol esters in very small VLDL	Inverse variance weighted	299	0.0962384	0.0347215	0.00557607	0.0120971	TRUE
WC	Cholesteryl esters to total lipids ratio in very small VLDL	Inverse variance weighted	299	-0.0524492	0.0195046	0.00716516	0.0150133	TRUE
WC	Free cholesterol in very small VLDL	Inverse variance weighted	299	0.0552853	0.0355347	0.119753	0.177272	FALSE
WC	Free cholesterol to total lipids ratio in very small VLDL	Inverse variance weighted	299	-0.217087	0.0196081	1.73e-28	9.15e-27	TRUE
WC	Total lipids in very small VLDL	Inverse variance weighted	299	0.122974	0.0385213	0.00141114	0.00349782	TRUE
WC	Concentration of very small VLDL particles	Inverse variance weighted	299	0.135659	0.0384766	0.000422285	0.00113617	TRUE
WC	Phospholipids in very small VLDL	Inverse variance weighted	299	0.0627592	0.0403317	0.11969	0.177272	FALSE
WC	Phospholipids to total lipids ratio in very small VLDL	Inverse variance weighted	299	-0.163467	0.0277788	3.99e-09	2.31e-08	TRUE
WC	Triglycerides in very small VLDL	Inverse variance weighted	299	0.22095	0.0329609	2.04e-11	1.42e-10	TRUE
WC	Triglycerides to total lipids ratio in very small VLDL	Inverse variance weighted	299	0.188923	0.0231608	3.43e-16	3.67e-15	TRUE
WC	Total cholesterol levels in chylomicrons and extremely large VLDL	Inverse variance weighted	299	0.19932	0.0295318	1.48e-11	1.04e-10	TRUE
WC	Total cholesterol to total lipids ratio in chylomicrons and extremely large VLDL	Inverse variance weighted	299	0.0298362	0.0181651	0.100486	0.151444	FALSE
WC	Cholesteryl ester levels in chylomicrons and extremely large VLDL	Inverse variance weighted	299	0.190938	0.0309208	6.61e-10	4.14e-09	TRUE
WC	Cholesteryl esters to total lipids ratio in chylomicrons and extremely large VLDL	Inverse variance weighted	299	-0.0214493	0.020104	0.28601	0.363361	FALSE
WC	Free cholesterol levels in chylomicrons and extremely large VLDL	Inverse variance weighted	299	0.205279	0.0271088	3.66e-14	3.22e-13	TRUE
WC	Free cholesterol to total lipids ratio in chylomicrons and extremely large VLDL	Inverse variance weighted	299	0.123227	0.0240523	3e-07	1.39e-06	TRUE
WC	Total lipid levels in chylomicrons and extremely large VLDL	Inverse variance weighted	299	0.200974	0.0294895	9.42e-12	6.79e-11	TRUE
WC	Concentration of chylomicrons and extremely large VLDL particles	Inverse variance weighted	299	0.201912	0.0296011	9.03e-12	6.58e-11	TRUE
WC	Phospholipid levels in chylomicrons and extremely large VLDL	Inverse variance weighted	299	0.191249	0.0285871	2.23e-11	1.53e-10	TRUE
WC	Phospholipids to total lipids ratio in chylomicrons and extremely large VLDL	Inverse variance weighted	299	0.0391537	0.0214351	0.0677574	0.106817	FALSE
WC	Triglyceride levels in chylomicrons and extremely large VLDL	Inverse variance weighted	299	0.201253	0.0295861	1.03e-11	7.36e-11	TRUE
WC	Triglycerides to total lipids ratio in chylomicrons and extremely large VLDL	Inverse variance weighted	299	-0.0194019	0.0198045	0.32725	0.406879	FALSE

## Sheet: TGstep1 result
Exposure	Mediation	method	nsnp	b	se	pval	FDR	FDR_significant
TG	Acetate levels	Inverse variance weighted	36	-0.0560109	0.0246378	0.023004	0.0345356	TRUE
TG	Acetone levels	Inverse variance weighted	36	0.0491778	0.0375255	0.190021	0.235005	FALSE
TG	Alanine levels	Inverse variance weighted	36	0.196905	0.0679962	0.00378159	0.00640341	TRUE
TG	Albumin levels	Inverse variance weighted	36	0.0804434	0.0350722	0.0218105	0.0328709	TRUE
TG	Apolipoprotein A-I levels	Inverse variance weighted	36	-0.183286	0.156949	0.242885	0.293833	FALSE
TG	Apolipoprotein B levels	Inverse variance weighted	36	0.578462	0.0751941	1.44e-14	5.49e-14	TRUE
TG	Ratio of apolipoprotein B to apolipoprotein A1 levels	Inverse variance weighted	36	0.66404	0.0913116	3.54e-13	1.24e-12	TRUE
TG	3-Hydroxybutyrate levels	Inverse variance weighted	36	-0.0645729	0.0479034	0.177664	0.220895	FALSE
TG	Citrate levels	Inverse variance weighted	36	-0.141305	0.0429778	0.00100956	0.00182064	TRUE
TG	Conjugated linoleic acid	Inverse variance weighted	36	0.348831	0.0522068	2.36e-11	7.04e-11	TRUE
TG	Ratio of conjugated linoleic acid to total fatty acids	Inverse variance weighted	36	0.210018	0.0458037	4.54e-06	1.01e-05	TRUE
TG	Creatinine levels	Inverse variance weighted	36	0.0609891	0.0347871	0.0795661	0.106791	FALSE
TG	Diacylglycerol levels	Inverse variance weighted	36	0.680278	0.0518658	2.66e-39	2.65e-38	TRUE
TG	Ratio of diacylglycerol to triglycerides	Inverse variance weighted	36	0.327129	0.0506653	1.07e-10	3.04e-10	TRUE
TG	Docosahexaenoic acid (22:6) levels	Inverse variance weighted	36	0.293928	0.156206	0.0598815	0.0823636	FALSE
TG	Ratio of 22:6 docosahexaenoic acid to total fatty acids	Inverse variance weighted	36	-0.103447	0.132118	0.433631	0.484818	FALSE
TG	Esterified cholesterol levels	Inverse variance weighted	36	0.162559	0.105506	0.123375	0.158295	FALSE
TG	Estimated description of fatty acid chain length not actual carbon number	Inverse variance weighted	36	0.418838	0.051042	2.29e-16	1e-15	TRUE
TG	Omega-3 fatty acids levels	Inverse variance weighted	36	0.34712	0.168381	0.0392533	0.0565267	FALSE
TG	Ratio of omega-3 fatty acids to total fatty acids	Inverse variance weighted	36	-0.159179	0.174574	0.361868	0.41331	FALSE
TG	Omega-6 fatty acids levels	Inverse variance weighted	36	0.419518	0.101527	3.59e-05	7.47e-05	TRUE
TG	Ratio of omega-6 fatty acids to total fatty acids	Inverse variance weighted	36	-0.570338	0.0490191	2.74e-31	2.24e-30	TRUE
TG	Free cholesterol levels	Inverse variance weighted	36	0.146898	0.120125	0.221375	0.269942	FALSE
TG	Glucose levels	Inverse variance weighted	36	-0.0117606	0.0279836	0.67429	0.723779	FALSE
TG	Glutamine levels	Inverse variance weighted	36	-0.167757	0.0499879	0.00079092	0.00144878	TRUE
TG	Glycerol levels	Inverse variance weighted	36	0.224124	0.0541537	3.49e-05	7.27e-05	TRUE
TG	Glycine levels	Inverse variance weighted	36	-0.10858	0.0495089	0.0282969	0.041729	TRUE
TG	Glycoprotein acetylation	Inverse variance weighted	36	0.557328	0.0466004	5.77e-33	4.87e-32	TRUE
TG	Total cholesterol in HDL2	Inverse variance weighted	36	-0.49779	0.151275	0.000999668	0.0018056	TRUE
TG	Total cholesterol in HDL3	Inverse variance weighted	36	-0.0320308	0.133586	0.810503	0.836289	FALSE
TG	Total cholesterol levels in HDL	Inverse variance weighted	36	-0.462763	0.156482	0.00310356	0.00530932	TRUE
TG	Mean diameter of HDL particles	Inverse variance weighted	36	-0.560985	0.199988	0.00503022	0.00835979	TRUE
TG	Triglyceride levels in HDL	Inverse variance weighted	36	0.785647	0.150296	1.72e-07	4.13e-07	TRUE
TG	Histidine levels	Inverse variance weighted	36	-0.0590544	0.0373304	0.113663	0.147952	FALSE
TG	Total Cholesterol in IDL	Inverse variance weighted	36	0.11137	0.0986176	0.258766	0.310147	FALSE
TG	Cholesteryl esters to total lipids ratio in IDL	Inverse variance weighted	36	-0.488766	0.109183	7.58e-06	1.66e-05	TRUE
TG	Cholesterol esters in IDL	Inverse variance weighted	36	0.147368	0.0936014	0.115389	0.149588	FALSE
TG	Cholesteryl esters to total lipids ratio in IDL	Inverse variance weighted	36	-0.207451	0.128388	0.106134	0.139872	FALSE
TG	Free cholesterol in IDL	Inverse variance weighted	36	0.0216782	0.109823	0.84352	0.865816	FALSE
TG	Free cholesterol to total lipids ratio in IDL	Inverse variance weighted	36	-0.689194	0.0791763	3.19e-18	1.53e-17	TRUE
TG	Total lipids in IDL	Inverse variance weighted	36	0.207026	0.110079	0.0600124	0.0824463	FALSE
TG	Concentration of IDL particles	Inverse variance weighted	36	0.249481	0.112967	0.0272129	0.0402834	TRUE
TG	Phospholipids in IDL	Inverse variance weighted	36	0.154008	0.104115	0.139082	0.176312	FALSE
TG	Phospholipids to total lipids ratio in IDL	Inverse variance weighted	36	-0.497374	0.100416	7.3e-07	1.69e-06	TRUE
TG	Triglycerides in IDL	Inverse variance weighted	36	0.763742	0.171316	8.27e-06	1.8e-05	TRUE
TG	Triglycerides to total lipids ratio in IDL	Inverse variance weighted	36	0.660547	0.120581	4.3e-08	1.06e-07	TRUE
TG	Isoleucine levels	Inverse variance weighted	36	0.436137	0.041965	2.67e-25	1.85e-24	TRUE
TG	Linoleic acid (18:2) levels	Inverse variance weighted	36	0.45877	0.0948954	1.33e-06	3.06e-06	TRUE
TG	Ratio of 18:2 linoleic acid to total fatty acids	Inverse variance weighted	36	-0.338493	0.119552	0.00463521	0.00773642	TRUE
TG	Lactate levels	Inverse variance weighted	36	0.0642707	0.0386163	0.0960448	0.128023	FALSE
TG	Total cholesterol levels in LDL	Inverse variance weighted	36	0.123023	0.0793818	0.121199	0.156019	FALSE
TG	Mean diameter of LDL particles	Inverse variance weighted	36	-0.087419	0.117475	0.456787	0.507299	FALSE
TG	Triglyceride levels in LDL	Inverse variance weighted	36	0.641133	0.166999	0.000123466	0.000246297	TRUE
TG	Leucine levels	Inverse variance weighted	36	0.273846	0.0439008	4.44e-10	1.22e-09	TRUE
TG	Total cholesterol in large HDL	Inverse variance weighted	36	-0.532027	0.181786	0.00342612	0.00583542	TRUE
TG	Total cholesterol to total lipids ratio in large HDL	Inverse variance weighted	36	-0.548872	0.116299	2.36e-06	5.4e-06	TRUE
TG	Cholesterol esters in large HDL	Inverse variance weighted	36	-0.522264	0.182309	0.00417381	0.00700647	TRUE
TG	Cholesteryl esters to total lipids ratio in large HDL	Inverse variance weighted	36	-0.423828	0.102651	3.65e-05	7.56e-05	TRUE
TG	Free cholesterol in large HDL	Inverse variance weighted	36	-0.559963	0.17891	0.00174886	0.00306379	TRUE
TG	Free cholesterol to total lipids ratio in large HDL	Inverse variance weighted	36	-0.583533	0.116121	5.03e-07	1.18e-06	TRUE
TG	Total lipids in large HDL	Inverse variance weighted	36	-0.494332	0.183955	0.00720427	0.011722	TRUE
TG	Concentration of large HDL particles	Inverse variance weighted	36	-0.481638	0.185282	0.00933624	0.0150231	TRUE
TG	Phospholipids in large HDL	Inverse variance weighted	36	-0.483321	0.175572	0.0059082	0.00969444	TRUE
TG	Phospholipids to total lipids ratio in large HDL	Inverse variance weighted	36	0.268402	0.16737	0.108792	0.142699	FALSE
TG	Triglycerides in large HDL	Inverse variance weighted	36	0.0839576	0.222593	0.70604	0.746403	FALSE
TG	Triglycerides to total lipids ratio in large HDL	Inverse variance weighted	36	0.653092	0.111942	5.4e-09	1.4e-08	TRUE
TG	Total cholesterol in large LDL	Inverse variance weighted	36	0.12758	0.0840089	0.128851	0.164235	FALSE
TG	Total cholesterol to total lipids ratio in large LDL	Inverse variance weighted	36	-0.324848	0.101899	0.00143288	0.00253309	TRUE
TG	Cholesterol esters in large LDL	Inverse variance weighted	36	0.161964	0.0816669	0.0473417	0.0666906	FALSE
TG	Cholesteryl esters to total lipids ratio in large LDL	Inverse variance weighted	36	0.0160054	0.0961949	0.867854	0.886108	FALSE
TG	Free cholesterol in large LDL	Inverse variance weighted	36	0.0211049	0.0909254	0.816451	0.840995	FALSE
TG	Free cholesterol to total lipids ratio in large LDL	Inverse variance weighted	36	-0.843663	0.0566193	3.27e-50	4.58e-49	TRUE
TG	Total lipids in large LDL	Inverse variance weighted	36	0.19038	0.0908488	0.0361204	0.0523386	FALSE
TG	Concentration of large LDL particles	Inverse variance weighted	36	0.219852	0.093076	0.0181733	0.0277119	TRUE
TG	Phospholipids in large LDL	Inverse variance weighted	36	0.181052	0.0862811	0.0358705	0.0521062	FALSE
TG	Phospholipids to total lipids ratio in large LDL	Inverse variance weighted	36	-0.212606	0.109658	0.0525245	0.0734586	FALSE
TG	Triglycerides in large LDL	Inverse variance weighted	36	0.612504	0.180141	0.000673532	0.00125146	TRUE
TG	Triglycerides to total lipids ratio in large LDL	Inverse variance weighted	36	0.539127	0.161676	0.000854192	0.00155977	TRUE
TG	Total Cholesterol in large VLDL	Inverse variance weighted	36	0.890899	0.0535809	4.43e-62	8.46e-61	TRUE
TG	Total cholesterol to total lipids ratio in large VLDL	Inverse variance weighted	36	0.0498425	0.121362	0.681298	0.727509	FALSE
TG	Cholesterol esters in large VLDL	Inverse variance weighted	36	0.887935	0.0599127	1.08e-49	1.48e-48	TRUE
TG	Cholesteryl esters to total lipids ratio in large VLDL	Inverse variance weighted	36	-0.241632	0.108271	0.0256327	0.0382358	TRUE
TG	Free cholesterol in large VLDL	Inverse variance weighted	36	0.874842	0.0491967	9.65e-71	2.29e-69	TRUE
TG	Free cholesterol to total lipids ratio in large VLDL	Inverse variance weighted	36	0.522311	0.0753252	4.09e-12	1.31e-11	TRUE
TG	Total lipids in large VLDL	Inverse variance weighted	36	0.877157	0.0587797	2.34e-50	3.33e-49	TRUE
TG	Concentration of large VLDL particles	Inverse variance weighted	36	0.874841	0.0600609	4.63e-48	6.06e-47	TRUE
TG	Phospholipids in large VLDL	Inverse variance weighted	36	0.878182	0.0552578	7.15e-57	1.28e-55	TRUE
TG	Phospholipids to total lipids ratio in large VLDL	Inverse variance weighted	36	0.116439	0.099399	0.241428	0.292373	FALSE
TG	Triglycerides in large VLDL	Inverse variance weighted	36	0.863326	0.0641141	2.5e-41	2.65e-40	TRUE
TG	Triglycerides to total lipids ratio in large VLDL	Inverse variance weighted	36	-0.10092	0.132517	0.44632	0.497961	FALSE
TG	Total cholesterol levels in medium HDL	Inverse variance weighted	36	-0.216128	0.105729	0.0409364	0.0587327	FALSE
TG	Total cholesterol to total lipids ratio in medium HDL	Inverse variance weighted	36	-0.656739	0.115611	1.34e-08	3.4e-08	TRUE
TG	Cholesterol esters in medium HDL	Inverse variance weighted	36	-0.237251	0.105389	0.0243731	0.0364501	TRUE
TG	Cholesteryl esters to total lipids ratio in medium HDL	Inverse variance weighted	36	-0.67156	0.135722	7.5e-07	1.73e-06	TRUE
TG	Free cholesterol in medium HDL	Inverse variance weighted	36	-0.128806	0.112893	0.253887	0.305241	FALSE
TG	Free cholesterol to total lipids ratio in medium HDL	Inverse variance weighted	36	-0.253383	0.115659	0.0284683	0.0418757	TRUE
TG	Total lipids in medium HDL	Inverse variance weighted	36	-0.0587583	0.107552	0.584842	0.638558	FALSE
TG	Concentration of medium HDL particles	Inverse variance weighted	36	-0.0223267	0.106818	0.834435	0.858761	FALSE
TG	Phospholipids in medium HDL	Inverse variance weighted	36	-0.0135517	0.114186	0.905528	0.920541	FALSE
TG	Phospholipids to total lipids ratio in medium HDL	Inverse variance weighted	36	0.287934	0.12171	0.0179943	0.0275109	TRUE
TG	Triglycerides in medium HDL	Inverse variance weighted	36	0.829361	0.0955401	3.93e-18	1.85e-17	TRUE
TG	Triglycerides to total lipids ratio in medium HDL	Inverse variance weighted	36	0.790936	0.101649	7.19e-15	2.79e-14	TRUE
TG	Total cholesterol in medium LDL	Inverse variance weighted	36	0.126434	0.0750949	0.0922485	0.123386	FALSE
TG	Total cholesterol to total lipids ratio in medium LDL	Inverse variance weighted	36	-0.289089	0.0778564	0.000204731	0.000398849	TRUE
TG	Cholesterol esters in medium LDL	Inverse variance weighted	36	0.121374	0.0749908	0.10555	0.139418	FALSE
TG	Cholesteryl esters to total lipids ratio in medium LDL	Inverse variance weighted	36	-0.0900464	0.0703553	0.200587	0.246762	FALSE
TG	Free cholesterol in medium LDL	Inverse variance weighted	36	0.147787	0.0734165	0.0441153	0.0628293	FALSE
TG	Free cholesterol to total lipids ratio in medium LDL	Inverse variance weighted	36	-0.350458	0.0840246	3.03e-05	6.38e-05	TRUE
TG	Total lipid levels in medium LDL	Inverse variance weighted	36	0.214192	0.0790253	0.0067198	0.0109644	TRUE
TG	Concentration of medium LDL particles	Inverse variance weighted	36	0.236824	0.0804899	0.00325803	0.00556541	TRUE
TG	Phospholipids in medium LDL	Inverse variance weighted	36	0.342977	0.0734202	2.99e-06	6.82e-06	TRUE
TG	Phospholipids to total lipids ratio in medium LDL	Inverse variance weighted	36	0.061411	0.0807757	0.447096	0.497961	FALSE
TG	Triglycerides in medium LDL	Inverse variance weighted	36	0.555981	0.165246	0.00076663	0.00140871	TRUE
TG	Triglycerides to total lipids ratio in medium LDL	Inverse variance weighted	36	0.464874	0.166216	0.00516091	0.00856476	TRUE
TG	Monounsaturated fatty acids (16:1, 18:1) levels	Inverse variance weighted	36	0.806253	0.076896	1.01e-25	7.32e-25	TRUE
TG	Ratio of monounsaturated fatty acids to total fatty acids	Inverse variance weighted	36	0.728762	0.081329	3.23e-19	1.62e-18	TRUE
TG	Total cholesterol in medium VLDL	Inverse variance weighted	36	0.889693	0.0606619	1.06e-48	1.4e-47	TRUE
TG	Total cholesterol to total lipids ratio in medium VLDL	Inverse variance weighted	36	-0.211856	0.145325	0.144893	0.18308	FALSE
TG	Cholesterol esters in medium VLDL	Inverse variance weighted	36	0.820536	0.0701011	1.2e-31	9.92e-31	TRUE
TG	Cholesteryl esters to total lipids ratio in medium VLDL	Inverse variance weighted	36	-0.413299	0.125837	0.00102203	0.00184028	TRUE
TG	Free cholesterol in medium VLDL	Inverse variance weighted	36	0.941374	0.054476	6.59e-67	1.4e-65	TRUE
TG	Free cholesterol to total lipids ratio in medium VLDL	Inverse variance weighted	36	0.716409	0.122721	5.29e-09	1.37e-08	TRUE
TG	Total lipids in medium VLDL	Inverse variance weighted	36	0.920779	0.0644944	3.05e-46	3.82e-45	TRUE
TG	Concentration of medium VLDL particles	Inverse variance weighted	36	0.919165	0.0666485	2.88e-43	3.22e-42	TRUE
TG	Phospholipids in medium VLDL	Inverse variance weighted	36	0.926553	0.0614762	2.49e-51	3.67e-50	TRUE
TG	Phospholipids to total lipids ratio in medium VLDL	Inverse variance weighted	36	-0.410161	0.11686	0.000448381	0.000850756	TRUE
TG	Triglycerides in medium VLDL	Inverse variance weighted	36	0.909306	0.0769484	3.19e-32	2.65e-31	TRUE
TG	Triglycerides to total lipids ratio in medium VLDL	Inverse variance weighted	36	0.249028	0.151059	0.0992396	0.131829	FALSE
TG	Phosphatidylcholine and other choline levels	Inverse variance weighted	36	0.271513	0.147097	0.0649207	0.0886666	FALSE
TG	Phenylalanine levels	Inverse variance weighted	36	0.0232583	0.0294391	0.429499	0.482513	FALSE
TG	Polyunsaturated fatty acids	Inverse variance weighted	36	0.430595	0.110979	0.000104471	0.000209482	TRUE
TG	Ratio of polyunsaturated fatty acids to total fatty acids	Inverse variance weighted	36	-0.557809	0.0568632	1.02e-22	6.02e-22	TRUE
TG	Pyruvate levels	Inverse variance weighted	36	0.14911	0.0412774	0.000303395	0.000585191	TRUE
TG	Remnant cholesterol (non-HDL, non-LDL -cholesterol)	Inverse variance weighted	36	0.561566	0.0868583	1.01e-10	2.89e-10	TRUE
TG	Serum total cholesterol levels	Inverse variance weighted	36	0.161559	0.110478	0.143641	0.181893	FALSE
TG	Serum total triglyceride levels	Inverse variance weighted	36	0.964727	0.0540979	3.92e-71	9.51e-70	TRUE
TG	Saturated fatty acids	Inverse variance weighted	36	0.581126	0.0975096	2.53e-09	6.66e-09	TRUE
TG	Ratio of saturated fatty acids to total fatty acids	Inverse variance weighted	36	-0.152812	0.049031	0.00182917	0.00319968	TRUE
TG	Total cholesterol levels in small HDL	Inverse variance weighted	36	-0.0149367	0.0787215	0.849512	0.869668	FALSE
TG	Total cholesterol to total lipids ratio in small HDL	Inverse variance weighted	36	-0.341447	0.0529351	1.12e-10	3.16e-10	TRUE
TG	Cholesterol esters in small HDL	Inverse variance weighted	36	-0.11041	0.0721935	0.126174	0.161176	FALSE
TG	Cholesteryl esters to total lipids ratio in small HDL	Inverse variance weighted	36	-0.327186	0.0538006	1.19e-09	3.17e-09	TRUE
TG	Free cholesterol in small HDL	Inverse variance weighted	36	0.278196	0.0971831	0.0042019	0.00704348	TRUE
TG	Free cholesterol to total lipids ratio in small HDL	Inverse variance weighted	36	0.130722	0.0827924	0.114356	0.148522	FALSE
TG	Total lipids in small HDL	Inverse variance weighted	36	0.250882	0.103227	0.0150821	0.0234588	TRUE
TG	Concentration of small HDL particles	Inverse variance weighted	36	0.290999	0.10468	0.00543777	0.00894775	TRUE
TG	Phospholipids in small HDL	Inverse variance weighted	36	0.268305	0.107407	0.0124892	0.0197153	TRUE
TG	Phospholipids to total lipids ratio in small HDL	Inverse variance weighted	36	0.0785702	0.0522184	0.132415	0.16841	FALSE
TG	Triglycerides in small HDL	Inverse variance weighted	36	0.909113	0.0926067	9.52e-23	5.63e-22	TRUE
TG	Triglycerides to total lipids ratio in small HDL	Inverse variance weighted	36	0.795786	0.101846	5.56e-15	2.18e-14	TRUE
TG	Total Cholesterol in small LDL	Inverse variance weighted	36	0.104993	0.075066	0.161911	0.203042	FALSE
TG	Total cholesterol to total lipids ratio in small LDL	Inverse variance weighted	36	-0.299099	0.0700695	1.97e-05	4.23e-05	TRUE
TG	Cholesterol esters in small LDL	Inverse variance weighted	36	0.0847235	0.0756652	0.262835	0.313733	FALSE
TG	Cholesteryl esters to total lipids ratio in small LDL	Inverse variance weighted	36	-0.154851	0.0703653	0.0277588	0.0409873	TRUE
TG	Free cholesterol in small LDL	Inverse variance weighted	36	0.183805	0.0689049	0.00764129	0.0123469	TRUE
TG	Free cholesterol to total lipids ratio in small LDL	Inverse variance weighted	36	-0.269522	0.0848921	0.00149903	0.00264201	TRUE
TG	Total lipids in small LDL	Inverse variance weighted	36	0.216114	0.0776518	0.00538397	0.00890631	TRUE
TG	Concentration of small LDL particles	Inverse variance weighted	36	0.243893	0.0786193	0.0019209	0.00335007	TRUE
TG	Phospholipids in small LDL	Inverse variance weighted	36	0.312012	0.074158	2.58e-05	5.47e-05	TRUE
TG	Phospholipids to total lipids ratio in small LDL	Inverse variance weighted	36	-0.0314346	0.075592	0.677523	0.724758	FALSE
TG	Triglycerides in small LDL	Inverse variance weighted	36	0.743003	0.120749	7.59e-10	2.05e-09	TRUE
TG	Triglycerides to total lipids ratio in small LDL	Inverse variance weighted	36	0.741215	0.123237	1.8e-09	4.79e-09	TRUE
TG	Sphingomyelins levels	Inverse variance weighted	36	-0.0425137	0.107489	0.692463	0.735387	FALSE
TG	Total cholesterol in small VLDL	Inverse variance weighted	36	0.738117	0.0824319	3.42e-19	1.71e-18	TRUE
TG	Total cholesterol to total lipids ratio in small VLDL	Inverse variance weighted	36	-0.551013	0.0841451	5.82e-11	1.69e-10	TRUE
TG	Cholesterol esters in small VLDL	Inverse variance weighted	36	0.601009	0.0853491	1.9e-12	6.18e-12	TRUE
TG	Cholesteryl esters to total lipids ratio in small VLDL	Inverse variance weighted	36	-0.575763	0.0759553	3.45e-14	1.28e-13	TRUE
TG	Free cholesterol in small VLDL	Inverse variance weighted	36	0.921824	0.0762691	1.25e-33	1.07e-32	TRUE
TG	Free cholesterol to total lipids ratio in small VLDL	Inverse variance weighted	36	-0.0721353	0.173614	0.677781	0.724758	FALSE
TG	Total lipids in small VLDL	Inverse variance weighted	36	0.943032	0.0679111	7.67e-44	8.85e-43	TRUE
TG	Concentration of small VLDL particles	Inverse variance weighted	36	0.95983	0.0654437	1.06e-48	1.4e-47	TRUE
TG	Phospholipids in small VLDL	Inverse variance weighted	36	0.959248	0.0749047	1.51e-37	1.47e-36	TRUE
TG	Phospholipids to total lipids ratio in small VLDL	Inverse variance weighted	36	-0.388125	0.102332	0.000148962	0.000294137	TRUE
TG	Triglycerides in small VLDL	Inverse variance weighted	36	1.00656	0.0600752	5.2e-63	1.03e-61	TRUE
TG	Triglycerides to total lipids ratio in small VLDL	Inverse variance weighted	36	0.631458	0.0978896	1.11e-10	3.16e-10	TRUE
TG	Ratio of triglycerides to phosphoglycerides	Inverse variance weighted	36	0.901777	0.0630917	2.42e-46	3.06e-45	TRUE
TG	Total cholines levels	Inverse variance weighted	36	0.195805	0.142779	0.170253	0.212588	FALSE
TG	Total fatty acids	Inverse variance weighted	36	0.653524	0.0973793	1.93e-11	5.83e-11	TRUE
TG	Total phosphoglycerides levels	Inverse variance weighted	36	0.299328	0.14171	0.0346652	0.0504811	FALSE
TG	Tyrosine levels	Inverse variance weighted	36	-0.0129667	0.0428103	0.761976	0.796145	FALSE
TG	Estimated degree of unsaturation	Inverse variance weighted	36	-0.482142	0.173198	0.00537312	0.00890425	TRUE
TG	Valine levels	Inverse variance weighted	36	-0.00804768	0.0391388	0.837089	0.859972	FALSE
TG	Total cholesterol levels in VLDL	Inverse variance weighted	36	0.792593	0.0746562	2.5e-26	1.9e-25	TRUE
TG	Mean diameter of VLDL particles	Inverse variance weighted	36	0.815404	0.103869	4.15e-15	1.64e-14	TRUE
TG	Triglyceride levels in VLDL	Inverse variance weighted	36	0.946119	0.0598637	2.89e-56	5.11e-55	TRUE
TG	Total cholesterol levels in very large HDL	Inverse variance weighted	36	-0.390313	0.159548	0.0144306	0.0225055	TRUE
TG	Total cholesterol to total lipids ratio in very large HDL	Inverse variance weighted	36	0.333423	0.138367	0.0159659	0.0246203	TRUE
TG	Cholesterol esters in very large HDL	Inverse variance weighted	36	-0.363443	0.152717	0.01732	0.0265149	TRUE
TG	Cholesteryl esters to total lipids ratio in very large HDL	Inverse variance weighted	36	0.355396	0.13941	0.0107941	0.0172262	TRUE
TG	Free cholesterol in very large HDL	Inverse variance weighted	36	-0.443365	0.171179	0.00959581	0.015377	TRUE
TG	Free cholesterol to total lipids ratio in very large HDL	Inverse variance weighted	36	-0.0224937	0.0564869	0.690474	0.733944	FALSE
TG	Total lipids in very large HDL	Inverse variance weighted	36	-0.478801	0.189715	0.0116096	0.0184266	TRUE
TG	Concentration of very large HDL particles	Inverse variance weighted	36	-0.478523	0.193409	0.0133551	0.0210253	TRUE
TG	Phospholipids in very large HDL	Inverse variance weighted	36	-0.570689	0.196879	0.00374732	0.00635462	TRUE
TG	Phospholipids to total lipids ratio in very large HDL	Inverse variance weighted	36	-0.497221	0.116632	2.02e-05	4.32e-05	TRUE
TG	Triglycerides in very large HDL	Inverse variance weighted	36	0.353588	0.176666	0.0453437	0.0642644	FALSE
TG	Triglycerides to total lipids ratio in very large HDL	Inverse variance weighted	36	0.718071	0.0668895	6.96e-27	5.4e-26	TRUE
TG	Total cholesterol in very large VLDL	Inverse variance weighted	36	0.801107	0.0509519	1.06e-55	1.78e-54	TRUE
TG	Total cholesterol to total lipids ratio in very large VLDL	Inverse variance weighted	36	-0.285796	0.0976348	0.0034204	0.00583421	TRUE
TG	Cholesterol esters in very large VLDL	Inverse variance weighted	36	0.810221	0.0543932	3.52e-50	4.88e-49	TRUE
TG	Cholesteryl esters to total lipids ratio in very large VLDL	Inverse variance weighted	36	-0.226753	0.0904124	0.0121423	0.0192198	TRUE
TG	Free cholesterol in very large VLDL	Inverse variance weighted	36	0.778779	0.0479134	2.1e-59	3.82e-58	TRUE
TG	Free cholesterol to total lipids ratio in very large VLDL	Inverse variance weighted	36	-0.190527	0.0684667	0.00538965	0.00890631	TRUE
TG	Total lipids in very large VLDL	Inverse variance weighted	36	0.810797	0.0539308	4.4e-51	6.4e-50	TRUE
TG	Concentration of very large VLDL particles	Inverse variance weighted	36	0.810266	0.0547316	1.37e-49	1.86e-48	TRUE
TG	Phospholipids in very large VLDL	Inverse variance weighted	36	0.790958	0.0506501	5.65e-55	9.28e-54	TRUE
TG	Phospholipids to total lipids ratio in very large VLDL	Inverse variance weighted	36	0.0531407	0.0545824	0.330261	0.381322	FALSE
TG	Triglycerides in very large VLDL	Inverse variance weighted	36	0.813316	0.0571489	5.84e-46	7.24e-45	TRUE
TG	Triglycerides to total lipids ratio in very large VLDL	Inverse variance weighted	36	0.237839	0.0970906	0.0142992	0.0223606	TRUE
TG	Total cholesterol in very small VLDL	Inverse variance weighted	36	0.32528	0.116978	0.00542433	0.00893825	TRUE
TG	Total cholesterol to total lipids ratio in very small VLDL	Inverse variance weighted	36	-0.627558	0.0757962	1.24e-16	5.46e-16	TRUE
TG	Cholesterol esters in very small VLDL	Inverse variance weighted	36	0.286157	0.110432	0.00956257	0.0153449	TRUE
TG	Cholesteryl esters to total lipids ratio in very small VLDL	Inverse variance weighted	36	-0.53322	0.0851529	3.8e-10	1.05e-09	TRUE
TG	Free cholesterol in very small VLDL	Inverse variance weighted	36	0.376446	0.127087	0.00305545	0.0052347	TRUE
TG	Free cholesterol to total lipids ratio in very small VLDL	Inverse variance weighted	36	-0.41061	0.0706995	6.33e-09	1.63e-08	TRUE
TG	Total lipids in very small VLDL	Inverse variance weighted	36	0.546941	0.121742	7.03e-06	1.55e-05	TRUE
TG	Concentration of very small VLDL particles	Inverse variance weighted	36	0.607401	0.121545	5.81e-07	1.36e-06	TRUE
TG	Phospholipids in very small VLDL	Inverse variance weighted	36	0.363801	0.126002	0.00388608	0.0065708	TRUE
TG	Phospholipids to total lipids ratio in very small VLDL	Inverse variance weighted	36	-0.490077	0.0885435	3.11e-08	7.74e-08	TRUE
TG	Triglycerides in very small VLDL	Inverse variance weighted	36	0.991804	0.0995437	2.2e-23	1.36e-22	TRUE
TG	Triglycerides to total lipids ratio in very small VLDL	Inverse variance weighted	36	0.821514	0.0781706	7.83e-26	5.77e-25	TRUE
TG	Total cholesterol levels in chylomicrons and extremely large VLDL	Inverse variance weighted	36	0.771379	0.0507801	4.08e-52	6.1e-51	TRUE
TG	Total cholesterol to total lipids ratio in chylomicrons and extremely large VLDL	Inverse variance weighted	36	0.220855	0.131732	0.0936302	0.125091	FALSE
TG	Cholesteryl ester levels in chylomicrons and extremely large VLDL	Inverse variance weighted	36	0.745974	0.0592152	2.17e-36	2.04e-35	TRUE
TG	Cholesteryl esters to total lipids ratio in chylomicrons and extremely large VLDL	Inverse variance weighted	36	-0.020981	0.123662	0.865274	0.88425	FALSE
TG	Free cholesterol levels in chylomicrons and extremely large VLDL	Inverse variance weighted	36	0.776923	0.0442021	3.72e-69	8.34e-68	TRUE
TG	Free cholesterol to total lipids ratio in chylomicrons and extremely large VLDL	Inverse variance weighted	36	0.521707	0.068785	3.34e-14	1.24e-13	TRUE
TG	Total lipid levels in chylomicrons and extremely large VLDL	Inverse variance weighted	36	0.748218	0.0533928	1.29e-44	1.57e-43	TRUE
TG	Concentration of chylomicrons and extremely large VLDL particles	Inverse variance weighted	36	0.743716	0.0543593	1.31e-42	1.45e-41	TRUE
TG	Phospholipid levels in chylomicrons and extremely large VLDL	Inverse variance weighted	36	0.765586	0.0494647	4.93e-54	7.98e-53	TRUE
TG	Phospholipids to total lipids ratio in chylomicrons and extremely large VLDL	Inverse variance weighted	36	0.449208	0.0584874	1.59e-14	6.04e-14	TRUE
TG	Triglyceride levels in chylomicrons and extremely large VLDL	Inverse variance weighted	36	0.732954	0.0572506	1.59e-37	1.51e-36	TRUE
TG	Triglycerides to total lipids ratio in chylomicrons and extremely large VLDL	Inverse variance weighted	36	-0.395691	0.120647	0.00103898	0.00186793	TRUE

## Sheet: HDL-Cstep1 result
Exposure	Mediation	method	nsnp	b	se	pval	FDR	FDR_significant
HDL-C	Acetate levels	Inverse variance weighted	322	0.0314931	0.0157686	0.0458023	0.0657949	FALSE
HDL-C	Acetone levels	Inverse variance weighted	322	-0.0702495	0.0166499	2.45e-05	4.88e-05	TRUE
HDL-C	Alanine levels	Inverse variance weighted	322	0.075761	0.0198263	0.000132779	0.000253171	TRUE
HDL-C	Albumin levels	Inverse variance weighted	322	0.0201637	0.0153209	0.188142	0.243	FALSE
HDL-C	Apolipoprotein A-I levels	Inverse variance weighted	322	0.757008	0.0207174	2.6e-292	1.44e-290	TRUE
HDL-C	Apolipoprotein B levels	Inverse variance weighted	322	-0.23942	0.0428921	2.38e-08	5.53e-08	TRUE
HDL-C	Ratio of apolipoprotein B to apolipoprotein A1 levels	Inverse variance weighted	322	-0.649773	0.0343379	7.39e-80	9.26e-79	TRUE
HDL-C	3-Hydroxybutyrate levels	Inverse variance weighted	322	-0.0107601	0.0232621	0.64368	0.695629	FALSE
HDL-C	Citrate levels	Inverse variance weighted	322	0.0441539	0.0178518	0.0133847	0.0205986	TRUE
HDL-C	Conjugated linoleic acid	Inverse variance weighted	321	-0.0254723	0.0263124	0.333008	0.397087	FALSE
HDL-C	Ratio of conjugated linoleic acid to total fatty acids	Inverse variance weighted	321	-0.00666639	0.0210542	0.751525	0.793049	FALSE
HDL-C	Creatinine levels	Inverse variance weighted	322	-0.0232352	0.0181725	0.201042	0.255972	FALSE
HDL-C	Diacylglycerol levels	Inverse variance weighted	321	-0.259321	0.0328466	2.9e-15	8.27e-15	TRUE
HDL-C	Ratio of diacylglycerol to triglycerides	Inverse variance weighted	321	-0.0727129	0.0226357	0.00131672	0.00232422	TRUE
HDL-C	Docosahexaenoic acid (22:6) levels	Inverse variance weighted	322	0.189253	0.040414	2.83e-06	5.91e-06	TRUE
HDL-C	Ratio of 22:6 docosahexaenoic acid to total fatty acids	Inverse variance weighted	322	0.239448	0.0327033	2.45e-13	6.64e-13	TRUE
HDL-C	Esterified cholesterol levels	Inverse variance weighted	322	0.228874	0.0418058	4.38e-08	1.01e-07	TRUE
HDL-C	Estimated description of fatty acid chain length not actual carbon number	Inverse variance weighted	320	-0.165182	0.0324139	3.47e-07	7.58e-07	TRUE
HDL-C	Omega-3 fatty acids levels	Inverse variance weighted	322	0.152276	0.0440742	0.000550318	0.00100019	TRUE
HDL-C	Ratio of omega-3 fatty acids to total fatty acids	Inverse variance weighted	322	0.238419	0.0422984	1.73e-08	4.07e-08	TRUE
HDL-C	Omega-6 fatty acids levels	Inverse variance weighted	322	0.131512	0.04193	0.00170998	0.00298222	TRUE
HDL-C	Ratio of omega-6 fatty acids to total fatty acids	Inverse variance weighted	322	0.312269	0.0253193	6e-35	3.36e-34	TRUE
HDL-C	Free cholesterol levels	Inverse variance weighted	322	0.241397	0.0418859	8.25e-09	1.97e-08	TRUE
HDL-C	Glucose levels	Inverse variance weighted	322	-0.0527888	0.0152366	0.000530993	0.000966573	TRUE
HDL-C	Glutamine levels	Inverse variance weighted	322	0.0300578	0.0179553	0.0941241	0.12931	FALSE
HDL-C	Glycerol levels	Inverse variance weighted	320	-0.153996	0.0207049	1.02e-13	2.83e-13	TRUE
HDL-C	Glycine levels	Inverse variance weighted	322	-0.0135157	0.0619503	0.827296	0.854433	FALSE
HDL-C	Glycoprotein acetylation	Inverse variance weighted	322	-0.282574	0.0238229	1.88e-32	9.43e-32	TRUE
HDL-C	Total cholesterol in HDL2	Inverse variance weighted	322	0.906281	0.0147843	0	0	TRUE
HDL-C	Total cholesterol in HDL3	Inverse variance weighted	322	0.470383	0.0249541	2.94e-79	3.61e-78	TRUE
HDL-C	Total cholesterol levels in HDL	Inverse variance weighted	322	0.900082	0.0150421	0	0	TRUE
HDL-C	Mean diameter of HDL particles	Inverse variance weighted	322	0.949867	0.0255849	1.07e-301	6.22e-300	TRUE
HDL-C	Triglyceride levels in HDL	Inverse variance weighted	322	-0.0664797	0.0486819	0.172066	0.224476	FALSE
HDL-C	Histidine levels	Inverse variance weighted	322	0.00297862	0.0166292	0.857843	0.878969	FALSE
HDL-C	Total Cholesterol in IDL	Inverse variance weighted	322	0.0850573	0.0437484	0.051867	0.0738692	FALSE
HDL-C	Cholesteryl esters to total lipids ratio in IDL	Inverse variance weighted	322	0.201537	0.0386509	1.85e-07	4.09e-07	TRUE
HDL-C	Cholesterol esters in IDL	Inverse variance weighted	322	0.0497292	0.0432018	0.249694	0.310277	FALSE
HDL-C	Cholesteryl esters to total lipids ratio in IDL	Inverse variance weighted	322	-0.0269607	0.033577	0.422003	0.489675	FALSE
HDL-C	Free cholesterol in IDL	Inverse variance weighted	322	0.167054	0.0441041	0.000152038	0.000288947	TRUE
HDL-C	Free cholesterol to total lipids ratio in IDL	Inverse variance weighted	322	0.53384	0.032285	2.05e-61	1.92e-60	TRUE
HDL-C	Total lipids in IDL	Inverse variance weighted	322	0.0544447	0.0448365	0.224635	0.282613	FALSE
HDL-C	Concentration of IDL particles	Inverse variance weighted	322	0.0350796	0.0451015	0.436691	0.502216	FALSE
HDL-C	Phospholipids in IDL	Inverse variance weighted	322	0.0733804	0.0443504	0.0980137	0.134179	FALSE
HDL-C	Phospholipids to total lipids ratio in IDL	Inverse variance weighted	322	0.14945	0.0326758	4.79e-06	9.83e-06	TRUE
HDL-C	Triglycerides in IDL	Inverse variance weighted	322	-0.168935	0.0506941	0.00086087	0.0015525	TRUE
HDL-C	Triglycerides to total lipids ratio in IDL	Inverse variance weighted	322	-0.246044	0.0431805	1.21e-08	2.88e-08	TRUE
HDL-C	Isoleucine levels	Inverse variance weighted	322	-0.244992	0.0206051	1.34e-32	6.77e-32	TRUE
HDL-C	Linoleic acid (18:2) levels	Inverse variance weighted	322	0.0477067	0.0431588	0.268996	0.33162	FALSE
HDL-C	Ratio of 18:2 linoleic acid to total fatty acids	Inverse variance weighted	322	0.124519	0.0342999	0.000283078	0.000523469	TRUE
HDL-C	Lactate levels	Inverse variance weighted	322	0.00766697	0.0128828	0.551756	0.611604	FALSE
HDL-C	Total cholesterol levels in LDL	Inverse variance weighted	322	0.0215663	0.0448519	0.630635	0.684069	FALSE
HDL-C	Mean diameter of LDL particles	Inverse variance weighted	322	0.0933011	0.0340643	0.00616312	0.00998614	TRUE
HDL-C	Triglyceride levels in LDL	Inverse variance weighted	322	-0.0461278	0.0484598	0.34116	0.406392	FALSE
HDL-C	Leucine levels	Inverse variance weighted	322	-0.134093	0.0178456	5.73e-14	1.59e-13	TRUE
HDL-C	Total cholesterol in large HDL	Inverse variance weighted	322	0.93768	0.0200497	0	0	TRUE
HDL-C	Total cholesterol to total lipids ratio in large HDL	Inverse variance weighted	322	0.600958	0.0226986	1.86e-154	5.55e-153	TRUE
HDL-C	Cholesterol esters in large HDL	Inverse variance weighted	322	0.937077	0.0201661	0	0	TRUE
HDL-C	Cholesteryl esters to total lipids ratio in large HDL	Inverse variance weighted	322	0.460972	0.0242807	2.27e-80	2.9e-79	TRUE
HDL-C	Free cholesterol in large HDL	Inverse variance weighted	322	0.931694	0.0198063	0	0	TRUE
HDL-C	Free cholesterol to total lipids ratio in large HDL	Inverse variance weighted	322	0.656997	0.01944	2.25e-250	1.09e-248	TRUE
HDL-C	Total lipids in large HDL	Inverse variance weighted	322	0.936417	0.0200629	0	0	TRUE
HDL-C	Concentration of large HDL particles	Inverse variance weighted	322	0.935105	0.0203473	0	0	TRUE
HDL-C	Phospholipids in large HDL	Inverse variance weighted	322	0.922202	0.0188938	0	0	TRUE
HDL-C	Phospholipids to total lipids ratio in large HDL	Inverse variance weighted	322	-0.516042	0.0307258	2.65e-63	2.55e-62	TRUE
HDL-C	Triglycerides in large HDL	Inverse variance weighted	322	0.584056	0.0408786	2.62e-46	1.95e-45	TRUE
HDL-C	Triglycerides to total lipids ratio in large HDL	Inverse variance weighted	322	-0.356648	0.0362308	7.29e-23	2.68e-22	TRUE
HDL-C	Total cholesterol in large LDL	Inverse variance weighted	322	0.0401306	0.0446872	0.369168	0.435305	FALSE
HDL-C	Total cholesterol to total lipids ratio in large LDL	Inverse variance weighted	322	0.0711713	0.0451429	0.114893	0.15513	FALSE
HDL-C	Cholesterol esters in large LDL	Inverse variance weighted	322	0.0117171	0.0446083	0.792808	0.825398	FALSE
HDL-C	Cholesteryl esters to total lipids ratio in large LDL	Inverse variance weighted	322	-0.0920911	0.0429798	0.0321406	0.0472179	TRUE
HDL-C	Free cholesterol in large LDL	Inverse variance weighted	322	0.125773	0.0444988	0.00470697	0.00781142	TRUE
HDL-C	Free cholesterol to total lipids ratio in large LDL	Inverse variance weighted	322	0.418228	0.0364554	1.82e-30	8.61e-30	TRUE
HDL-C	Total lipids in large LDL	Inverse variance weighted	322	0.032017	0.0447736	0.474556	0.53663	FALSE
HDL-C	Concentration of large LDL particles	Inverse variance weighted	322	0.0224231	0.0447821	0.616572	0.670687	FALSE
HDL-C	Phospholipids in large LDL	Inverse variance weighted	322	0.0433207	0.0438666	0.323371	0.387978	FALSE
HDL-C	Phospholipids to total lipids ratio in large LDL	Inverse variance weighted	322	0.0257739	0.0459131	0.57455	0.632657	FALSE
HDL-C	Triglycerides in large LDL	Inverse variance weighted	322	-0.0293455	0.0497429	0.555229	0.614284	FALSE
HDL-C	Triglycerides to total lipids ratio in large LDL	Inverse variance weighted	322	-0.0692159	0.0462014	0.134098	0.178543	FALSE
HDL-C	Total Cholesterol in large VLDL	Inverse variance weighted	322	-0.489521	0.0356633	7.08e-43	4.66e-42	TRUE
HDL-C	Total cholesterol to total lipids ratio in large VLDL	Inverse variance weighted	322	0.104788	0.0283749	0.00022165	0.000416488	TRUE
HDL-C	Cholesterol esters in large VLDL	Inverse variance weighted	322	-0.503994	0.0355124	1.03e-45	7.57e-45	TRUE
HDL-C	Cholesteryl esters to total lipids ratio in large VLDL	Inverse variance weighted	322	0.146506	0.0263555	2.72e-08	6.28e-08	TRUE
HDL-C	Free cholesterol in large VLDL	Inverse variance weighted	322	-0.458336	0.0353583	1.99e-38	1.22e-37	TRUE
HDL-C	Free cholesterol to total lipids ratio in large VLDL	Inverse variance weighted	322	-0.0618774	0.0294122	0.0353958	0.0516743	FALSE
HDL-C	Total lipids in large VLDL	Inverse variance weighted	322	-0.505073	0.0349149	1.99e-47	1.5e-46	TRUE
HDL-C	Concentration of large VLDL particles	Inverse variance weighted	322	-0.508678	0.0347856	2e-48	1.56e-47	TRUE
HDL-C	Phospholipids in large VLDL	Inverse variance weighted	322	-0.489278	0.0352818	9.94e-44	6.73e-43	TRUE
HDL-C	Phospholipids to total lipids ratio in large VLDL	Inverse variance weighted	322	0.169556	0.0300307	1.64e-08	3.86e-08	TRUE
HDL-C	Triglycerides in large VLDL	Inverse variance weighted	322	-0.513666	0.0344331	2.52e-50	2.04e-49	TRUE
HDL-C	Triglycerides to total lipids ratio in large VLDL	Inverse variance weighted	322	-0.125851	0.0319202	8.06e-05	0.0001562	TRUE
HDL-C	Total cholesterol levels in medium HDL	Inverse variance weighted	322	0.566355	0.0245808	1.83e-117	3.49e-116	TRUE
HDL-C	Total cholesterol to total lipids ratio in medium HDL	Inverse variance weighted	322	0.454529	0.0349036	9.12e-39	5.59e-38	TRUE
HDL-C	Cholesterol esters in medium HDL	Inverse variance weighted	322	0.559189	0.0254875	1.09e-106	1.83e-105	TRUE
HDL-C	Cholesteryl esters to total lipids ratio in medium HDL	Inverse variance weighted	322	0.361431	0.0402932	2.96e-19	9.67e-19	TRUE
HDL-C	Free cholesterol in medium HDL	Inverse variance weighted	322	0.568231	0.0232663	9.76e-132	2.47e-130	TRUE
HDL-C	Free cholesterol to total lipids ratio in medium HDL	Inverse variance weighted	322	0.56265	0.0190934	7.33e-191	2.75e-189	TRUE
HDL-C	Total lipids in medium HDL	Inverse variance weighted	322	0.525865	0.0258593	6.22e-92	9.06e-91	TRUE
HDL-C	Concentration of medium HDL particles	Inverse variance weighted	322	0.505981	0.0264342	1.15e-81	1.52e-80	TRUE
HDL-C	Phospholipids in medium HDL	Inverse variance weighted	322	0.529345	0.0263969	1.89e-89	2.65e-88	TRUE
HDL-C	Phospholipids to total lipids ratio in medium HDL	Inverse variance weighted	322	-0.170349	0.0322244	1.25e-07	2.79e-07	TRUE
HDL-C	Triglycerides in medium HDL	Inverse variance weighted	322	-0.279514	0.0414951	1.63e-11	4.22e-11	TRUE
HDL-C	Triglycerides to total lipids ratio in medium HDL	Inverse variance weighted	322	-0.57531	0.0332316	3.81e-67	3.86e-66	TRUE
HDL-C	Total cholesterol in medium LDL	Inverse variance weighted	322	-0.00547751	0.0445518	0.902149	0.916307	FALSE
HDL-C	Total cholesterol to total lipids ratio in medium LDL	Inverse variance weighted	322	0.0461912	0.0414043	0.264587	0.32653	FALSE
HDL-C	Cholesterol esters in medium LDL	Inverse variance weighted	322	-0.0133262	0.0443311	0.763715	0.803463	FALSE
HDL-C	Cholesteryl esters to total lipids ratio in medium LDL	Inverse variance weighted	322	-0.00577569	0.0404169	0.886367	0.904219	FALSE
HDL-C	Free cholesterol in medium LDL	Inverse variance weighted	322	0.0292098	0.0443609	0.510244	0.572122	FALSE
HDL-C	Free cholesterol to total lipids ratio in medium LDL	Inverse variance weighted	322	0.133058	0.0400786	0.00090037	0.00161872	TRUE
HDL-C	Total lipid levels in medium LDL	Inverse variance weighted	322	-0.0188707	0.04465	0.672561	0.719498	FALSE
HDL-C	Concentration of medium LDL particles	Inverse variance weighted	322	-0.0249731	0.044574	0.575301	0.632885	FALSE
HDL-C	Phospholipids in medium LDL	Inverse variance weighted	322	-0.0581147	0.043855	0.18512	0.239361	FALSE
HDL-C	Phospholipids to total lipids ratio in medium LDL	Inverse variance weighted	322	-0.0529755	0.0415117	0.201899	0.256782	FALSE
HDL-C	Triglycerides in medium LDL	Inverse variance weighted	322	0.00890327	0.0466085	0.848508	0.873974	FALSE
HDL-C	Triglycerides to total lipids ratio in medium LDL	Inverse variance weighted	322	0.0398577	0.0435063	0.359596	0.426608	FALSE
HDL-C	Monounsaturated fatty acids (16:1, 18:1) levels	Inverse variance weighted	322	-0.197472	0.039334	5.16e-07	1.12e-06	TRUE
HDL-C	Ratio of monounsaturated fatty acids to total fatty acids	Inverse variance weighted	322	-0.42285	0.0308389	8.65e-43	5.66e-42	TRUE
HDL-C	Total cholesterol in medium VLDL	Inverse variance weighted	322	-0.457707	0.038392	9.1e-33	4.63e-32	TRUE
HDL-C	Total cholesterol to total lipids ratio in medium VLDL	Inverse variance weighted	322	0.408573	0.0334878	3.08e-34	1.64e-33	TRUE
HDL-C	Cholesterol esters in medium VLDL	Inverse variance weighted	322	-0.398528	0.038592	5.34e-25	2.14e-24	TRUE
HDL-C	Cholesteryl esters to total lipids ratio in medium VLDL	Inverse variance weighted	322	0.452055	0.0321222	5.57e-45	3.98e-44	TRUE
HDL-C	Free cholesterol in medium VLDL	Inverse variance weighted	322	-0.517209	0.0379004	2.12e-42	1.37e-41	TRUE
HDL-C	Free cholesterol to total lipids ratio in medium VLDL	Inverse variance weighted	322	-0.119918	0.040353	0.00296124	0.00501431	TRUE
HDL-C	Total lipids in medium VLDL	Inverse variance weighted	322	-0.556411	0.0364208	1.08e-52	9.08e-52	TRUE
HDL-C	Concentration of medium VLDL particles	Inverse variance weighted	322	-0.565943	0.0361109	2.34e-55	2.02e-54	TRUE
HDL-C	Phospholipids in medium VLDL	Inverse variance weighted	322	-0.549054	0.0367931	2.34e-50	1.92e-49	TRUE
HDL-C	Phospholipids to total lipids ratio in medium VLDL	Inverse variance weighted	322	0.371524	0.0302591	1.19e-34	6.5e-34	TRUE
HDL-C	Triglycerides in medium VLDL	Inverse variance weighted	322	-0.598397	0.0352404	1.15e-64	1.12e-63	TRUE
HDL-C	Triglycerides to total lipids ratio in medium VLDL	Inverse variance weighted	322	-0.422095	0.0337574	7.12e-36	4.05e-35	TRUE
HDL-C	Phosphatidylcholine and other choline levels	Inverse variance weighted	322	0.409943	0.0357563	1.98e-30	9.34e-30	TRUE
HDL-C	Phenylalanine levels	Inverse variance weighted	322	-0.0138531	0.0146552	0.344523	0.409561	FALSE
HDL-C	Polyunsaturated fatty acids	Inverse variance weighted	322	0.140895	0.0425736	0.000934807	0.00167289	TRUE
HDL-C	Ratio of polyunsaturated fatty acids to total fatty acids	Inverse variance weighted	322	0.34435	0.025188	1.51e-42	9.82e-42	TRUE
HDL-C	Pyruvate levels	Inverse variance weighted	322	-0.00700586	0.0146168	0.631724	0.684573	FALSE
HDL-C	Remnant cholesterol (non-HDL, non-LDL -cholesterol)	Inverse variance weighted	322	-0.201852	0.041701	1.3e-06	2.78e-06	TRUE
HDL-C	Serum total cholesterol levels	Inverse variance weighted	322	0.235192	0.04213	2.37e-08	5.52e-08	TRUE
HDL-C	Serum total triglyceride levels	Inverse variance weighted	322	-0.478628	0.0397739	2.36e-33	1.23e-32	TRUE
HDL-C	Saturated fatty acids	Inverse variance weighted	322	-0.0038571	0.039158	0.921534	0.933554	FALSE
HDL-C	Ratio of saturated fatty acids to total fatty acids	Inverse variance weighted	322	0.0590675	0.0203101	0.00363421	0.00610946	TRUE
HDL-C	Total cholesterol levels in small HDL	Inverse variance weighted	322	0.116438	0.0284497	4.26e-05	8.36e-05	TRUE
HDL-C	Total cholesterol to total lipids ratio in small HDL	Inverse variance weighted	322	0.142591	0.0372051	0.000126809	0.000242583	TRUE
HDL-C	Cholesterol esters in small HDL	Inverse variance weighted	322	0.0930424	0.0303224	0.0021518	0.00370288	TRUE
HDL-C	Cholesteryl esters to total lipids ratio in small HDL	Inverse variance weighted	322	0.0987144	0.0375905	0.00863825	0.0137668	TRUE
HDL-C	Free cholesterol in small HDL	Inverse variance weighted	322	0.0967149	0.0323751	0.00281432	0.00477942	TRUE
HDL-C	Free cholesterol to total lipids ratio in small HDL	Inverse variance weighted	322	0.179698	0.0290647	6.3e-10	1.56e-09	TRUE
HDL-C	Total lipids in small HDL	Inverse variance weighted	322	0.0118158	0.0304414	0.697907	0.743425	FALSE
HDL-C	Concentration of small HDL particles	Inverse variance weighted	322	-0.0241522	0.0312182	0.439133	0.50403	FALSE
HDL-C	Phospholipids in small HDL	Inverse variance weighted	322	0.0257471	0.037012	0.486653	0.548839	FALSE
HDL-C	Phospholipids to total lipids ratio in small HDL	Inverse variance weighted	322	0.0413594	0.0385559	0.283401	0.346445	FALSE
HDL-C	Triglycerides in small HDL	Inverse variance weighted	322	-0.537228	0.0384677	2.52e-44	1.76e-43	TRUE
HDL-C	Triglycerides to total lipids ratio in small HDL	Inverse variance weighted	322	-0.537066	0.0365958	9.23e-49	7.37e-48	TRUE
HDL-C	Total Cholesterol in small LDL	Inverse variance weighted	322	0.0183079	0.0447034	0.682142	0.729079	FALSE
HDL-C	Total cholesterol to total lipids ratio in small LDL	Inverse variance weighted	322	0.0526021	0.0421047	0.211549	0.267015	FALSE
HDL-C	Cholesterol esters in small LDL	Inverse variance weighted	322	0.0133785	0.0446676	0.764549	0.803463	FALSE
HDL-C	Cholesteryl esters to total lipids ratio in small LDL	Inverse variance weighted	322	0.0215525	0.0414467	0.603059	0.657832	FALSE
HDL-C	Free cholesterol in small LDL	Inverse variance weighted	322	0.0380765	0.0430611	0.376565	0.44313	FALSE
HDL-C	Free cholesterol to total lipids ratio in small LDL	Inverse variance weighted	322	0.0980835	0.0398643	0.013877	0.0212719	TRUE
HDL-C	Total lipids in small LDL	Inverse variance weighted	322	0.00267937	0.0445585	0.952051	0.960294	FALSE
HDL-C	Concentration of small LDL particles	Inverse variance weighted	322	-0.00425278	0.0445002	0.923864	0.935101	FALSE
HDL-C	Phospholipids in small LDL	Inverse variance weighted	322	0.0266762	0.0427661	0.532779	0.594528	FALSE
HDL-C	Phospholipids to total lipids ratio in small LDL	Inverse variance weighted	322	0.0541994	0.0420038	0.196931	0.251562	FALSE
HDL-C	Triglycerides in small LDL	Inverse variance weighted	322	-0.146478	0.0445873	0.00101909	0.00181534	TRUE
HDL-C	Triglycerides to total lipids ratio in small LDL	Inverse variance weighted	322	-0.176877	0.0433675	4.53e-05	8.86e-05	TRUE
HDL-C	Sphingomyelins levels	Inverse variance weighted	322	0.393316	0.0315633	1.22e-35	6.88e-35	TRUE
HDL-C	Total cholesterol in small VLDL	Inverse variance weighted	322	-0.340715	0.0392937	4.28e-18	1.34e-17	TRUE
HDL-C	Total cholesterol to total lipids ratio in small VLDL	Inverse variance weighted	322	0.422426	0.0344283	1.32e-34	7.17e-34	TRUE
HDL-C	Cholesterol esters in small VLDL	Inverse variance weighted	322	-0.276121	0.0377529	2.6e-13	7.03e-13	TRUE
HDL-C	Cholesteryl esters to total lipids ratio in small VLDL	Inverse variance weighted	322	0.379606	0.0354647	9.77e-27	4.11e-26	TRUE
HDL-C	Free cholesterol in small VLDL	Inverse variance weighted	322	-0.427293	0.0416023	9.53e-25	3.79e-24	TRUE
HDL-C	Free cholesterol to total lipids ratio in small VLDL	Inverse variance weighted	322	0.451939	0.0307921	9.03e-49	7.26e-48	TRUE
HDL-C	Total lipids in small VLDL	Inverse variance weighted	322	-0.501745	0.0398701	2.57e-36	1.47e-35	TRUE
HDL-C	Concentration of small VLDL particles	Inverse variance weighted	322	-0.522501	0.0396044	9.62e-40	6.03e-39	TRUE
HDL-C	Phospholipids in small VLDL	Inverse variance weighted	322	-0.484557	0.0408059	1.6e-32	8.08e-32	TRUE
HDL-C	Phospholipids to total lipids ratio in small VLDL	Inverse variance weighted	322	0.36797	0.0317156	4.02e-31	1.94e-30	TRUE
HDL-C	Triglycerides in small VLDL	Inverse variance weighted	322	-0.593708	0.0388392	9.44e-53	7.97e-52	TRUE
HDL-C	Triglycerides to total lipids ratio in small VLDL	Inverse variance weighted	322	-0.508305	0.0351348	1.95e-47	1.48e-46	TRUE
HDL-C	Ratio of triglycerides to phosphoglycerides	Inverse variance weighted	322	-0.670229	0.0316637	1.92e-99	3.02e-98	TRUE
HDL-C	Total cholines levels	Inverse variance weighted	322	0.426523	0.034725	1.12e-34	6.18e-34	TRUE
HDL-C	Total fatty acids	Inverse variance weighted	322	-0.0254582	0.042067	0.545058	0.605331	FALSE
HDL-C	Total phosphoglycerides levels	Inverse variance weighted	322	0.370221	0.0360763	1.04e-24	4.13e-24	TRUE
HDL-C	Tyrosine levels	Inverse variance weighted	322	-0.0267976	0.0207509	0.196566	0.251372	FALSE
HDL-C	Estimated degree of unsaturation	Inverse variance weighted	322	0.420408	0.0441878	1.83e-21	6.41e-21	TRUE
HDL-C	Valine levels	Inverse variance weighted	322	-0.022261	0.0173259	0.198849	0.253734	FALSE
HDL-C	Total cholesterol levels in VLDL	Inverse variance weighted	322	-0.377353	0.03916	5.62e-22	2e-21	TRUE
HDL-C	Mean diameter of VLDL particles	Inverse variance weighted	322	-0.575226	0.0349339	6.42e-61	5.99e-60	TRUE
HDL-C	Triglyceride levels in VLDL	Inverse variance weighted	322	-0.568143	0.0364521	9.06e-55	7.76e-54	TRUE
HDL-C	Total cholesterol levels in very large HDL	Inverse variance weighted	322	0.733425	0.0253617	6.97e-184	2.32e-182	TRUE
HDL-C	Total cholesterol to total lipids ratio in very large HDL	Inverse variance weighted	322	-0.551867	0.0262902	7.87e-98	1.21e-96	TRUE
HDL-C	Cholesterol esters in very large HDL	Inverse variance weighted	322	0.697024	0.0251507	4.75e-169	1.46e-167	TRUE
HDL-C	Cholesteryl esters to total lipids ratio in very large HDL	Inverse variance weighted	322	-0.587217	0.0241839	3.09e-130	7.5e-129	TRUE
HDL-C	Free cholesterol in very large HDL	Inverse variance weighted	322	0.796836	0.0252974	9.04e-218	3.76e-216	TRUE
HDL-C	Free cholesterol to total lipids ratio in very large HDL	Inverse variance weighted	322	0.0279914	0.0223508	0.210436	0.266186	FALSE
HDL-C	Total lipids in very large HDL	Inverse variance weighted	322	0.866068	0.026635	6.29e-232	2.82e-230	TRUE
HDL-C	Concentration of very large HDL particles	Inverse variance weighted	322	0.874551	0.0269846	2.03e-230	8.78e-229	TRUE
HDL-C	Phospholipids in very large HDL	Inverse variance weighted	322	0.931628	0.0259628	5.58e-282	2.83e-280	TRUE
HDL-C	Phospholipids to total lipids ratio in very large HDL	Inverse variance weighted	322	0.612002	0.0232603	1.43e-152	4.18e-151	TRUE
HDL-C	Triglycerides in very large HDL	Inverse variance weighted	322	0.25448	0.042841	2.85e-09	6.94e-09	TRUE
HDL-C	Triglycerides to total lipids ratio in very large HDL	Inverse variance weighted	322	-0.449511	0.0319257	5.05e-45	3.63e-44	TRUE
HDL-C	Total cholesterol in very large VLDL	Inverse variance weighted	322	-0.423305	0.0327195	2.77e-38	1.66e-37	TRUE
HDL-C	Total cholesterol to total lipids ratio in very large VLDL	Inverse variance weighted	322	0.217672	0.0250727	3.9e-18	1.23e-17	TRUE
HDL-C	Cholesterol esters in very large VLDL	Inverse variance weighted	322	-0.453819	0.0326752	7.41e-44	5.08e-43	TRUE
HDL-C	Cholesteryl esters to total lipids ratio in very large VLDL	Inverse variance weighted	322	0.0703781	0.0227101	0.00194194	0.00336379	TRUE
HDL-C	Free cholesterol in very large VLDL	Inverse variance weighted	322	-0.38339	0.0325752	5.61e-32	2.75e-31	TRUE
HDL-C	Free cholesterol to total lipids ratio in very large VLDL	Inverse variance weighted	322	0.294761	0.0210049	9.8e-45	6.92e-44	TRUE
HDL-C	Total lipids in very large VLDL	Inverse variance weighted	322	-0.440562	0.0328044	4.04e-41	2.54e-40	TRUE
HDL-C	Concentration of very large VLDL particles	Inverse variance weighted	322	-0.4448	0.032722	4.39e-42	2.82e-41	TRUE
HDL-C	Phospholipids in very large VLDL	Inverse variance weighted	322	-0.400581	0.0328615	3.51e-34	1.85e-33	TRUE
HDL-C	Phospholipids to total lipids ratio in very large VLDL	Inverse variance weighted	322	0.199742	0.0236981	3.5e-17	1.05e-16	TRUE
HDL-C	Triglycerides in very large VLDL	Inverse variance weighted	322	-0.45416	0.0327084	7.8e-44	5.31e-43	TRUE
HDL-C	Triglycerides to total lipids ratio in very large VLDL	Inverse variance weighted	322	-0.264582	0.0265917	2.53e-23	9.47e-23	TRUE
HDL-C	Total cholesterol in very small VLDL	Inverse variance weighted	322	-0.0624515	0.0396291	0.115049	0.15513	FALSE
HDL-C	Total cholesterol to total lipids ratio in very small VLDL	Inverse variance weighted	322	0.27858	0.0324546	9.19e-18	2.82e-17	TRUE
HDL-C	Cholesterol esters in very small VLDL	Inverse variance weighted	322	-0.0706319	0.0377159	0.0611051	0.0866027	FALSE
HDL-C	Cholesteryl esters to total lipids ratio in very small VLDL	Inverse variance weighted	322	0.180589	0.0310757	6.2e-09	1.49e-08	TRUE
HDL-C	Free cholesterol in very small VLDL	Inverse variance weighted	322	-0.0379669	0.0418467	0.364255	0.430383	FALSE
HDL-C	Free cholesterol to total lipids ratio in very small VLDL	Inverse variance weighted	322	0.364267	0.0218787	3.06e-62	2.9e-61	TRUE
HDL-C	Total lipids in very small VLDL	Inverse variance weighted	322	-0.159406	0.0435218	0.000249597	0.000465994	TRUE
HDL-C	Concentration of very small VLDL particles	Inverse variance weighted	322	-0.18907	0.0439997	1.73e-05	3.47e-05	TRUE
HDL-C	Phospholipids in very small VLDL	Inverse variance weighted	322	-0.0323149	0.0446622	0.469348	0.532668	FALSE
HDL-C	Phospholipids to total lipids ratio in very small VLDL	Inverse variance weighted	322	0.417253	0.0330585	1.6e-36	9.25e-36	TRUE
HDL-C	Triglycerides in very small VLDL	Inverse variance weighted	322	-0.443226	0.045077	8.15e-23	2.98e-22	TRUE
HDL-C	Triglycerides to total lipids ratio in very small VLDL	Inverse variance weighted	322	-0.46016	0.0403677	4.22e-30	1.97e-29	TRUE
HDL-C	Total cholesterol levels in chylomicrons and extremely large VLDL	Inverse variance weighted	322	-0.363276	0.0335458	2.5e-27	1.07e-26	TRUE
HDL-C	Total cholesterol to total lipids ratio in chylomicrons and extremely large VLDL	Inverse variance weighted	322	0.0689015	0.0321025	0.0318494	0.0469084	TRUE
HDL-C	Cholesteryl ester levels in chylomicrons and extremely large VLDL	Inverse variance weighted	322	-0.351098	0.03429	1.32e-24	5.21e-24	TRUE
HDL-C	Cholesteryl esters to total lipids ratio in chylomicrons and extremely large VLDL	Inverse variance weighted	322	0.116974	0.0299952	9.63e-05	0.000185729	TRUE
HDL-C	Free cholesterol levels in chylomicrons and extremely large VLDL	Inverse variance weighted	322	-0.364526	0.0323468	1.86e-29	8.47e-29	TRUE
HDL-C	Free cholesterol to total lipids ratio in chylomicrons and extremely large VLDL	Inverse variance weighted	322	-0.087305	0.0308781	0.00469266	0.00779879	TRUE
HDL-C	Total lipid levels in chylomicrons and extremely large VLDL	Inverse variance weighted	322	-0.38683	0.0317086	3.13e-34	1.66e-33	TRUE
HDL-C	Concentration of chylomicrons and extremely large VLDL particles	Inverse variance weighted	322	-0.39063	0.0315407	3.15e-35	1.77e-34	TRUE
HDL-C	Phospholipid levels in chylomicrons and extremely large VLDL	Inverse variance weighted	322	-0.362177	0.0325443	9.09e-29	4.03e-28	TRUE
HDL-C	Phospholipids to total lipids ratio in chylomicrons and extremely large VLDL	Inverse variance weighted	322	-0.0282325	0.0269998	0.29572	0.359243	FALSE
HDL-C	Triglyceride levels in chylomicrons and extremely large VLDL	Inverse variance weighted	322	-0.396704	0.0310819	2.63e-37	1.54e-36	TRUE
HDL-C	Triglycerides to total lipids ratio in chylomicrons and extremely large VLDL	Inverse variance weighted	322	-0.052597	0.0334159	0.115485	0.155537	FALSE

## Sheet: DBPstep1 result
Exposure	Mediation	method	nsnp	b	se	pval	FDR	FDR_significant
DBP	Acetate levels	Inverse variance weighted	19	-0.00342761	0.00219139	0.117788	0.99988	FALSE
DBP	Acetone levels	Inverse variance weighted	19	-0.00370584	0.00198936	0.0624866	0.99988	FALSE
DBP	Alanine levels	Inverse variance weighted	19	-0.00280149	0.00313999	0.372287	0.99988	FALSE
DBP	Albumin levels	Inverse variance weighted	19	0.000562338	0.00191793	0.769368	0.99988	FALSE
DBP	Apolipoprotein A-I levels	Inverse variance weighted	19	-0.00109166	0.00223474	0.625198	0.99988	FALSE
DBP	Apolipoprotein B levels	Inverse variance weighted	19	-0.00340777	0.00307712	0.268097	0.99988	FALSE
DBP	Ratio of apolipoprotein B to apolipoprotein A1 levels	Inverse variance weighted	19	-0.00288892	0.00364474	0.427994	0.99988	FALSE
DBP	3-Hydroxybutyrate levels	Inverse variance weighted	19	-0.00198906	0.00293893	0.498534	0.99988	FALSE
DBP	Citrate levels	Inverse variance weighted	19	-0.00306615	0.00256769	0.232428	0.99988	FALSE
DBP	Conjugated linoleic acid	Inverse variance weighted	19	-0.000906671	0.00315943	0.774133	0.99988	FALSE
DBP	Ratio of conjugated linoleic acid to total fatty acids	Inverse variance weighted	19	-0.000424874	0.00279925	0.879359	0.99988	FALSE
DBP	Creatinine levels	Inverse variance weighted	19	-2.07e-05	0.00258614	0.993617	0.99988	FALSE
DBP	Diacylglycerol levels	Inverse variance weighted	19	-0.00284262	0.00370831	0.443348	0.99988	FALSE
DBP	Ratio of diacylglycerol to triglycerides	Inverse variance weighted	19	-0.001542	0.00270553	0.568715	0.99988	FALSE
DBP	Docosahexaenoic acid (22:6) levels	Inverse variance weighted	19	-0.00211646	0.0022449	0.345791	0.99988	FALSE
DBP	Ratio of 22:6 docosahexaenoic acid to total fatty acids	Inverse variance weighted	19	0.00049834	0.00189715	0.792799	0.99988	FALSE
DBP	Esterified cholesterol levels	Inverse variance weighted	19	-0.00272496	0.00208283	0.190773	0.99988	FALSE
DBP	Estimated description of fatty acid chain length not actual carbon number	Inverse variance weighted	19	0.000329638	0.00259141	0.898779	0.99988	FALSE
DBP	Omega-3 fatty acids levels	Inverse variance weighted	19	-0.00180054	0.00245309	0.462957	0.99988	FALSE
DBP	Ratio of omega-3 fatty acids to total fatty acids	Inverse variance weighted	19	0.00167675	0.0018495	0.364621	0.99988	FALSE
DBP	Omega-6 fatty acids levels	Inverse variance weighted	19	-0.00259276	0.00227453	0.254323	0.99988	FALSE
DBP	Ratio of omega-6 fatty acids to total fatty acids	Inverse variance weighted	19	0.00325932	0.00299864	0.277067	0.99988	FALSE
DBP	Free cholesterol levels	Inverse variance weighted	19	-0.00182993	0.00184628	0.321615	0.99988	FALSE
DBP	Glucose levels	Inverse variance weighted	19	0.00129371	0.00204369	0.526715	0.99988	FALSE
DBP	Glutamine levels	Inverse variance weighted	19	0.00099242	0.00199088	0.618143	0.99988	FALSE
DBP	Glycerol levels	Inverse variance weighted	19	-0.00398956	0.00389848	0.306136	0.99988	FALSE
DBP	Glycine levels	Inverse variance weighted	19	0.00327523	0.0026866	0.222808	0.99988	FALSE
DBP	Glycoprotein acetylation	Inverse variance weighted	19	-0.00159001	0.00288963	0.582149	0.99988	FALSE
DBP	Total cholesterol in HDL2	Inverse variance weighted	19	0.00094179	0.00305605	0.757951	0.99988	FALSE
DBP	Total cholesterol in HDL3	Inverse variance weighted	19	-0.000345738	0.0020761	0.867738	0.99988	FALSE
DBP	Total cholesterol levels in HDL	Inverse variance weighted	19	0.000659027	0.00292783	0.821909	0.99988	FALSE
DBP	Mean diameter of HDL particles	Inverse variance weighted	19	0.00183968	0.00335021	0.582921	0.99988	FALSE
DBP	Triglyceride levels in HDL	Inverse variance weighted	19	-0.0018791	0.00265438	0.478993	0.99988	FALSE
DBP	Histidine levels	Inverse variance weighted	19	-0.00422281	0.00186683	0.0236961	0.99988	FALSE
DBP	Total Cholesterol in IDL	Inverse variance weighted	19	-0.00199494	0.00209502	0.34098	0.99988	FALSE
DBP	Cholesteryl esters to total lipids ratio in IDL	Inverse variance weighted	19	-0.000145831	0.00187356	0.937958	0.99988	FALSE
DBP	Cholesterol esters in IDL	Inverse variance weighted	19	-0.0021329	0.00218764	0.329571	0.99988	FALSE
DBP	Cholesteryl esters to total lipids ratio in IDL	Inverse variance weighted	19	-0.000680327	0.00190266	0.720667	0.99988	FALSE
DBP	Free cholesterol in IDL	Inverse variance weighted	19	-0.00164584	0.00184829	0.373214	0.99988	FALSE
DBP	Free cholesterol to total lipids ratio in IDL	Inverse variance weighted	19	0.000489309	0.00233	0.833665	0.99988	FALSE
DBP	Total lipids in IDL	Inverse variance weighted	19	-0.0023377	0.0022798	0.305176	0.99988	FALSE
DBP	Concentration of IDL particles	Inverse variance weighted	19	-0.00248768	0.00239033	0.298002	0.99988	FALSE
DBP	Phospholipids in IDL	Inverse variance weighted	19	-0.0022743	0.00220818	0.303037	0.99988	FALSE
DBP	Phospholipids to total lipids ratio in IDL	Inverse variance weighted	19	0.000246057	0.00235357	0.916736	0.99988	FALSE
DBP	Triglycerides in IDL	Inverse variance weighted	19	-0.0022952	0.00335908	0.494428	0.99988	FALSE
DBP	Triglycerides to total lipids ratio in IDL	Inverse variance weighted	19	-0.00130795	0.00222892	0.557334	0.99988	FALSE
DBP	Isoleucine levels	Inverse variance weighted	19	-0.00243461	0.00255706	0.341041	0.99988	FALSE
DBP	Linoleic acid (18:2) levels	Inverse variance weighted	19	-0.00210895	0.00204805	0.303134	0.99988	FALSE
DBP	Ratio of 18:2 linoleic acid to total fatty acids	Inverse variance weighted	19	0.00363398	0.00277128	0.189756	0.99988	FALSE
DBP	Lactate levels	Inverse variance weighted	19	-0.000479249	0.00294665	0.870801	0.99988	FALSE
DBP	Total cholesterol levels in LDL	Inverse variance weighted	19	-0.00216371	0.0022545	0.337192	0.99988	FALSE
DBP	Mean diameter of LDL particles	Inverse variance weighted	19	0.00136954	0.00206092	0.506353	0.99988	FALSE
DBP	Triglyceride levels in LDL	Inverse variance weighted	19	-0.00230837	0.00319643	0.47019	0.99988	FALSE
DBP	Leucine levels	Inverse variance weighted	19	-0.00432747	0.0024673	0.0794431	0.99988	FALSE
DBP	Total cholesterol in large HDL	Inverse variance weighted	19	0.00257138	0.00331435	0.437847	0.99988	FALSE
DBP	Total cholesterol to total lipids ratio in large HDL	Inverse variance weighted	19	0.00355396	0.0030174	0.238868	0.99988	FALSE
DBP	Cholesterol esters in large HDL	Inverse variance weighted	19	0.0025048	0.00329509	0.447159	0.99988	FALSE
DBP	Cholesteryl esters to total lipids ratio in large HDL	Inverse variance weighted	19	0.00310124	0.00274804	0.259096	0.99988	FALSE
DBP	Free cholesterol in large HDL	Inverse variance weighted	19	0.00269681	0.0033612	0.422359	0.99988	FALSE
DBP	Free cholesterol to total lipids ratio in large HDL	Inverse variance weighted	19	0.00260132	0.00280925	0.354455	0.99988	FALSE
DBP	Total lipids in large HDL	Inverse variance weighted	19	0.00218888	0.00319294	0.493004	0.99988	FALSE
DBP	Concentration of large HDL particles	Inverse variance weighted	19	0.00209441	0.00316811	0.508554	0.99988	FALSE
DBP	Phospholipids in large HDL	Inverse variance weighted	19	0.00158277	0.00309813	0.609437	0.99988	FALSE
DBP	Phospholipids to total lipids ratio in large HDL	Inverse variance weighted	19	-0.00403696	0.00255511	0.114118	0.99988	FALSE
DBP	Triglycerides in large HDL	Inverse variance weighted	19	0.00153449	0.00211114	0.467314	0.99988	FALSE
DBP	Triglycerides to total lipids ratio in large HDL	Inverse variance weighted	19	-0.0015016	0.00226371	0.507115	0.99988	FALSE
DBP	Total cholesterol in large LDL	Inverse variance weighted	19	-0.00222784	0.00224093	0.320145	0.99988	FALSE
DBP	Total cholesterol to total lipids ratio in large LDL	Inverse variance weighted	19	-0.000769632	0.00185417	0.678082	0.99988	FALSE
DBP	Cholesterol esters in large LDL	Inverse variance weighted	19	-0.00244801	0.00234989	0.297525	0.99988	FALSE
DBP	Cholesteryl esters to total lipids ratio in large LDL	Inverse variance weighted	19	-0.0019851	0.00214203	0.354063	0.99988	FALSE
DBP	Free cholesterol in large LDL	Inverse variance weighted	19	-0.00163218	0.00189599	0.389317	0.99988	FALSE
DBP	Free cholesterol to total lipids ratio in large LDL	Inverse variance weighted	19	0.00395585	0.0032988	0.230458	0.99988	FALSE
DBP	Total lipids in large LDL	Inverse variance weighted	19	-0.00245505	0.0023352	0.29311	0.99988	FALSE
DBP	Concentration of large LDL particles	Inverse variance weighted	19	-0.00257472	0.00240751	0.284865	0.99988	FALSE
DBP	Phospholipids in large LDL	Inverse variance weighted	19	-0.00255233	0.00227589	0.262091	0.99988	FALSE
DBP	Phospholipids to total lipids ratio in large LDL	Inverse variance weighted	19	0.00133037	0.0023701	0.574584	0.99988	FALSE
DBP	Triglycerides in large LDL	Inverse variance weighted	19	-0.00185302	0.00311007	0.5513	0.99988	FALSE
DBP	Triglycerides to total lipids ratio in large LDL	Inverse variance weighted	19	0.000641485	0.00217039	0.767565	0.99988	FALSE
DBP	Total Cholesterol in large VLDL	Inverse variance weighted	19	-0.00273587	0.00334242	0.413056	0.99988	FALSE
DBP	Total cholesterol to total lipids ratio in large VLDL	Inverse variance weighted	19	2.26e-05	0.00193329	0.990666	0.99988	FALSE
DBP	Cholesterol esters in large VLDL	Inverse variance weighted	19	-0.00261365	0.00333634	0.433399	0.99988	FALSE
DBP	Cholesteryl esters to total lipids ratio in large VLDL	Inverse variance weighted	19	-0.000406898	0.00205113	0.84275	0.99988	FALSE
DBP	Free cholesterol in large VLDL	Inverse variance weighted	19	-0.0028143	0.00325109	0.386684	0.99988	FALSE
DBP	Free cholesterol to total lipids ratio in large VLDL	Inverse variance weighted	19	-0.00179048	0.00257681	0.487153	0.99988	FALSE
DBP	Total lipids in large VLDL	Inverse variance weighted	19	-0.00299691	0.00332983	0.36811	0.99988	FALSE
DBP	Concentration of large VLDL particles	Inverse variance weighted	19	-0.00300456	0.00331588	0.364877	0.99988	FALSE
DBP	Phospholipids in large VLDL	Inverse variance weighted	19	-0.00306527	0.00330438	0.353595	0.99988	FALSE
DBP	Phospholipids to total lipids ratio in large VLDL	Inverse variance weighted	19	-0.00212054	0.00223169	0.342014	0.99988	FALSE
DBP	Triglycerides in large VLDL	Inverse variance weighted	19	-0.00298889	0.0033002	0.365112	0.99988	FALSE
DBP	Triglycerides to total lipids ratio in large VLDL	Inverse variance weighted	19	-0.000147685	0.00192862	0.938961	0.99988	FALSE
DBP	Total cholesterol levels in medium HDL	Inverse variance weighted	19	-0.00142905	0.00212732	0.501736	0.99988	FALSE
DBP	Total cholesterol to total lipids ratio in medium HDL	Inverse variance weighted	19	-8.61e-05	0.00277946	0.975299	0.99988	FALSE
DBP	Cholesterol esters in medium HDL	Inverse variance weighted	19	-0.00135013	0.00215765	0.531483	0.99988	FALSE
DBP	Cholesteryl esters to total lipids ratio in medium HDL	Inverse variance weighted	19	0.000166622	0.0027803	0.952212	0.99988	FALSE
DBP	Free cholesterol in medium HDL	Inverse variance weighted	19	-0.00120112	0.00207316	0.562342	0.99988	FALSE
DBP	Free cholesterol to total lipids ratio in medium HDL	Inverse variance weighted	19	-0.000966199	0.00220914	0.661848	0.99988	FALSE
DBP	Total lipids in medium HDL	Inverse variance weighted	19	-0.00186234	0.001984	0.347896	0.99988	FALSE
DBP	Concentration of medium HDL particles	Inverse variance weighted	19	-0.0018985	0.00195275	0.330942	0.99988	FALSE
DBP	Phospholipids in medium HDL	Inverse variance weighted	19	-0.00162798	0.00203968	0.424781	0.99988	FALSE
DBP	Phospholipids to total lipids ratio in medium HDL	Inverse variance weighted	19	0.00134182	0.00200006	0.50229	0.99988	FALSE
DBP	Triglycerides in medium HDL	Inverse variance weighted	19	-0.00293754	0.00319521	0.357909	0.99988	FALSE
DBP	Triglycerides to total lipids ratio in medium HDL	Inverse variance weighted	19	-0.00212826	0.00312647	0.496046	0.99988	FALSE
DBP	Total cholesterol in medium LDL	Inverse variance weighted	19	-0.00205	0.00233855	0.380699	0.99988	FALSE
DBP	Total cholesterol to total lipids ratio in medium LDL	Inverse variance weighted	19	-0.000418152	0.00184372	0.820581	0.99988	FALSE
DBP	Cholesterol esters in medium LDL	Inverse variance weighted	19	-0.0020382	0.00234653	0.385064	0.99988	FALSE
DBP	Cholesteryl esters to total lipids ratio in medium LDL	Inverse variance weighted	19	-0.000691229	0.00184381	0.707741	0.99988	FALSE
DBP	Free cholesterol in medium LDL	Inverse variance weighted	19	-0.0021678	0.00231764	0.349608	0.99988	FALSE
DBP	Free cholesterol to total lipids ratio in medium LDL	Inverse variance weighted	19	0.00218401	0.00278527	0.432965	0.99988	FALSE
DBP	Total lipid levels in medium LDL	Inverse variance weighted	19	-0.00246482	0.00250795	0.325705	0.99988	FALSE
DBP	Concentration of medium LDL particles	Inverse variance weighted	19	-0.00252792	0.00255297	0.322082	0.99988	FALSE
DBP	Phospholipids in medium LDL	Inverse variance weighted	19	-0.00323835	0.00269007	0.228661	0.99988	FALSE
DBP	Phospholipids to total lipids ratio in medium LDL	Inverse variance weighted	19	0.000396321	0.00201628	0.844172	0.99988	FALSE
DBP	Triglycerides in medium LDL	Inverse variance weighted	19	-0.00199059	0.00304142	0.512793	0.99988	FALSE
DBP	Triglycerides to total lipids ratio in medium LDL	Inverse variance weighted	19	0.000251941	0.00225897	0.911197	0.99988	FALSE
DBP	Monounsaturated fatty acids (16:1, 18:1) levels	Inverse variance weighted	19	-0.00484832	0.00311515	0.119621	0.99988	FALSE
DBP	Ratio of monounsaturated fatty acids to total fatty acids	Inverse variance weighted	19	-0.00304693	0.0023462	0.194059	0.99988	FALSE
DBP	Total cholesterol in medium VLDL	Inverse variance weighted	19	-0.00265989	0.00328584	0.418228	0.99988	FALSE
DBP	Total cholesterol to total lipids ratio in medium VLDL	Inverse variance weighted	19	-0.000641232	0.00228784	0.779264	0.99988	FALSE
DBP	Cholesterol esters in medium VLDL	Inverse variance weighted	19	-0.00268573	0.00304083	0.377115	0.99988	FALSE
DBP	Cholesteryl esters to total lipids ratio in medium VLDL	Inverse variance weighted	19	-0.00032306	0.00258522	0.900552	0.99988	FALSE
DBP	Free cholesterol in medium VLDL	Inverse variance weighted	19	-0.00258238	0.00348079	0.458151	0.99988	FALSE
DBP	Free cholesterol to total lipids ratio in medium VLDL	Inverse variance weighted	19	-0.00182622	0.00275294	0.507095	0.99988	FALSE
DBP	Total lipids in medium VLDL	Inverse variance weighted	19	-0.00267814	0.00354145	0.449514	0.99988	FALSE
DBP	Concentration of medium VLDL particles	Inverse variance weighted	19	-0.00269582	0.00356436	0.449454	0.99988	FALSE
DBP	Phospholipids in medium VLDL	Inverse variance weighted	19	-0.00265791	0.00357201	0.456819	0.99988	FALSE
DBP	Phospholipids to total lipids ratio in medium VLDL	Inverse variance weighted	19	0.00142326	0.00258779	0.582327	0.99988	FALSE
DBP	Triglycerides in medium VLDL	Inverse variance weighted	19	-0.0025865	0.00357149	0.468939	0.99988	FALSE
DBP	Triglycerides to total lipids ratio in medium VLDL	Inverse variance weighted	19	-0.000315976	0.00218586	0.885063	0.99988	FALSE
DBP	Phosphatidylcholine and other choline levels	Inverse variance weighted	19	-0.00332693	0.00193427	0.0854346	0.99988	FALSE
DBP	Phenylalanine levels	Inverse variance weighted	19	-0.00356428	0.00198614	0.072722	0.99988	FALSE
DBP	Polyunsaturated fatty acids	Inverse variance weighted	19	-0.00274551	0.00236831	0.246347	0.99988	FALSE
DBP	Ratio of polyunsaturated fatty acids to total fatty acids	Inverse variance weighted	19	0.00327407	0.00274513	0.232994	0.99988	FALSE
DBP	Pyruvate levels	Inverse variance weighted	19	0.00271024	0.00280877	0.334586	0.99988	FALSE
DBP	Remnant cholesterol (non-HDL, non-LDL -cholesterol)	Inverse variance weighted	19	-0.00308962	0.00285455	0.279097	0.99988	FALSE
DBP	Serum total cholesterol levels	Inverse variance weighted	19	-0.00251285	0.00199885	0.2087	0.99988	FALSE
DBP	Serum total triglyceride levels	Inverse variance weighted	19	-0.00294974	0.00363522	0.417117	0.99988	FALSE
DBP	Saturated fatty acids	Inverse variance weighted	19	-0.00482808	0.00315413	0.12584	0.99988	FALSE
DBP	Ratio of saturated fatty acids to total fatty acids	Inverse variance weighted	19	-0.00237358	0.00183488	0.195808	0.99988	FALSE
DBP	Total cholesterol levels in small HDL	Inverse variance weighted	19	0.000438384	0.00203073	0.829086	0.99988	FALSE
DBP	Total cholesterol to total lipids ratio in small HDL	Inverse variance weighted	19	-1.87e-05	0.0018475	0.991917	0.99988	FALSE
DBP	Cholesterol esters in small HDL	Inverse variance weighted	19	-9.04e-06	0.00200701	0.996406	0.99988	FALSE
DBP	Cholesteryl esters to total lipids ratio in small HDL	Inverse variance weighted	19	-0.000310047	0.00184816	0.866772	0.99988	FALSE
DBP	Free cholesterol in small HDL	Inverse variance weighted	19	9.44e-06	0.00213424	0.996471	0.99988	FALSE
DBP	Free cholesterol to total lipids ratio in small HDL	Inverse variance weighted	19	0.00162184	0.00228057	0.47699	0.99988	FALSE
DBP	Total lipids in small HDL	Inverse variance weighted	19	-0.00163771	0.00227795	0.472178	0.99988	FALSE
DBP	Concentration of small HDL particles	Inverse variance weighted	19	-0.00191554	0.00239133	0.423112	0.99988	FALSE
DBP	Phospholipids in small HDL	Inverse variance weighted	19	-0.00155975	0.00203978	0.444471	0.99988	FALSE
DBP	Phospholipids to total lipids ratio in small HDL	Inverse variance weighted	19	-0.000152246	0.00188094	0.935488	0.99988	FALSE
DBP	Triglycerides in small HDL	Inverse variance weighted	19	-0.00142735	0.0035973	0.691528	0.99988	FALSE
DBP	Triglycerides to total lipids ratio in small HDL	Inverse variance weighted	19	-0.00142441	0.00300621	0.635626	0.99988	FALSE
DBP	Total Cholesterol in small LDL	Inverse variance weighted	19	-0.00180958	0.00228916	0.429235	0.99988	FALSE
DBP	Total cholesterol to total lipids ratio in small LDL	Inverse variance weighted	19	-0.000645086	0.00184413	0.726485	0.99988	FALSE
DBP	Cholesterol esters in small LDL	Inverse variance weighted	19	-0.00168931	0.00227115	0.456992	0.99988	FALSE
DBP	Cholesteryl esters to total lipids ratio in small LDL	Inverse variance weighted	19	-0.00063779	0.00184274	0.72926	0.99988	FALSE
DBP	Free cholesterol in small LDL	Inverse variance weighted	19	-0.0022016	0.00237621	0.354176	0.99988	FALSE
DBP	Free cholesterol to total lipids ratio in small LDL	Inverse variance weighted	19	0.00236807	0.00268516	0.377824	0.99988	FALSE
DBP	Total lipids in small LDL	Inverse variance weighted	19	-0.00239796	0.00253193	0.343594	0.99988	FALSE
DBP	Concentration of small LDL particles	Inverse variance weighted	19	-0.00248505	0.00262057	0.342984	0.99988	FALSE
DBP	Phospholipids in small LDL	Inverse variance weighted	19	-0.00332044	0.00268642	0.216455	0.99988	FALSE
DBP	Phospholipids to total lipids ratio in small LDL	Inverse variance weighted	19	0.000784363	0.00208212	0.706387	0.99988	FALSE
DBP	Triglycerides in small LDL	Inverse variance weighted	19	-0.00257555	0.00330667	0.436043	0.99988	FALSE
DBP	Triglycerides to total lipids ratio in small LDL	Inverse variance weighted	19	-0.000942717	0.00252056	0.708397	0.99988	FALSE
DBP	Sphingomyelins levels	Inverse variance weighted	19	-0.00137608	0.00189896	0.468668	0.99988	FALSE
DBP	Total cholesterol in small VLDL	Inverse variance weighted	19	-0.00174175	0.00298913	0.560098	0.99988	FALSE
DBP	Total cholesterol to total lipids ratio in small VLDL	Inverse variance weighted	19	0.000820589	0.00226688	0.717359	0.99988	FALSE
DBP	Cholesterol esters in small VLDL	Inverse variance weighted	19	-0.00123126	0.00268475	0.646512	0.99988	FALSE
DBP	Cholesteryl esters to total lipids ratio in small VLDL	Inverse variance weighted	19	0.000719592	0.0021807	0.741413	0.99988	FALSE
DBP	Free cholesterol in small VLDL	Inverse variance weighted	19	-0.00213141	0.00334897	0.524492	0.99988	FALSE
DBP	Free cholesterol to total lipids ratio in small VLDL	Inverse variance weighted	19	0.00116045	0.00262513	0.658451	0.99988	FALSE
DBP	Total lipids in small VLDL	Inverse variance weighted	19	-0.00225764	0.00350045	0.518954	0.99988	FALSE
DBP	Concentration of small VLDL particles	Inverse variance weighted	19	-0.00214187	0.00357262	0.548824	0.99988	FALSE
DBP	Phospholipids in small VLDL	Inverse variance weighted	19	-0.00235217	0.00353946	0.506335	0.99988	FALSE
DBP	Phospholipids to total lipids ratio in small VLDL	Inverse variance weighted	19	0.00201601	0.00282123	0.474866	0.99988	FALSE
DBP	Triglycerides in small VLDL	Inverse variance weighted	19	-0.00210141	0.00368345	0.568338	0.99988	FALSE
DBP	Triglycerides to total lipids ratio in small VLDL	Inverse variance weighted	19	-0.000925127	0.002719	0.733672	0.99988	FALSE
DBP	Ratio of triglycerides to phosphoglycerides	Inverse variance weighted	19	-0.00331109	0.00327935	0.312649	0.99988	FALSE
DBP	Total cholines levels	Inverse variance weighted	19	-0.00318608	0.00201001	0.112942	0.99988	FALSE
DBP	Total fatty acids	Inverse variance weighted	19	-0.00459588	0.00304143	0.130765	0.99988	FALSE
DBP	Total phosphoglycerides levels	Inverse variance weighted	19	-0.00341289	0.00219722	0.120358	0.99988	FALSE
DBP	Tyrosine levels	Inverse variance weighted	19	-0.000671483	0.00212068	0.75152	0.99988	FALSE
DBP	Estimated degree of unsaturation	Inverse variance weighted	19	0.00358759	0.00206337	0.0820863	0.99988	FALSE
DBP	Valine levels	Inverse variance weighted	19	-0.00169294	0.00221962	0.445633	0.99988	FALSE
DBP	Total cholesterol levels in VLDL	Inverse variance weighted	19	-0.00270645	0.00319668	0.397194	0.99988	FALSE
DBP	Mean diameter of VLDL particles	Inverse variance weighted	19	-0.00189695	0.00313424	0.545023	0.99988	FALSE
DBP	Triglyceride levels in VLDL	Inverse variance weighted	19	-0.00261528	0.00361149	0.468971	0.99988	FALSE
DBP	Total cholesterol levels in very large HDL	Inverse variance weighted	19	0.00143192	0.00235883	0.543818	0.99988	FALSE
DBP	Total cholesterol to total lipids ratio in very large HDL	Inverse variance weighted	19	-0.00132334	0.00300339	0.65949	0.99988	FALSE
DBP	Cholesterol esters in very large HDL	Inverse variance weighted	19	0.00135326	0.00220885	0.540104	0.99988	FALSE
DBP	Cholesteryl esters to total lipids ratio in very large HDL	Inverse variance weighted	19	-0.00168157	0.00297278	0.571628	0.99988	FALSE
DBP	Free cholesterol in very large HDL	Inverse variance weighted	19	0.00186527	0.00263141	0.478418	0.99988	FALSE
DBP	Free cholesterol to total lipids ratio in very large HDL	Inverse variance weighted	19	0.000308262	0.00250944	0.902233	0.99988	FALSE
DBP	Total lipids in very large HDL	Inverse variance weighted	19	0.00190656	0.00290586	0.511755	0.99988	FALSE
DBP	Concentration of very large HDL particles	Inverse variance weighted	19	0.00197924	0.00294682	0.501806	0.99988	FALSE
DBP	Phospholipids in very large HDL	Inverse variance weighted	19	0.00238364	0.00338447	0.481254	0.99988	FALSE
DBP	Phospholipids to total lipids ratio in very large HDL	Inverse variance weighted	19	0.00144743	0.00324609	0.65567	0.99988	FALSE
DBP	Triglycerides in very large HDL	Inverse variance weighted	19	-0.000930295	0.00188612	0.621848	0.99988	FALSE
DBP	Triglycerides to total lipids ratio in very large HDL	Inverse variance weighted	19	-0.00332578	0.00251683	0.186363	0.99988	FALSE
DBP	Total cholesterol in very large VLDL	Inverse variance weighted	19	-0.0025262	0.00313416	0.420231	0.99988	FALSE
DBP	Total cholesterol to total lipids ratio in very large VLDL	Inverse variance weighted	19	0.000564744	0.00233667	0.809023	0.99988	FALSE
DBP	Cholesterol esters in very large VLDL	Inverse variance weighted	19	-0.00236738	0.00312926	0.449332	0.99988	FALSE
DBP	Cholesteryl esters to total lipids ratio in very large VLDL	Inverse variance weighted	19	0.000456364	0.00203609	0.82265	0.99988	FALSE
DBP	Free cholesterol in very large VLDL	Inverse variance weighted	19	-0.00275896	0.00312001	0.376547	0.99988	FALSE
DBP	Free cholesterol to total lipids ratio in very large VLDL	Inverse variance weighted	19	-0.00152507	0.00253617	0.547622	0.99988	FALSE
DBP	Total lipids in very large VLDL	Inverse variance weighted	19	-0.0029977	0.0031924	0.347725	0.99988	FALSE
DBP	Concentration of very large VLDL particles	Inverse variance weighted	19	-0.00309976	0.0031899	0.331179	0.99988	FALSE
DBP	Phospholipids in very large VLDL	Inverse variance weighted	19	-0.00322138	0.00317044	0.309597	0.99988	FALSE
DBP	Phospholipids to total lipids ratio in very large VLDL	Inverse variance weighted	19	-0.0042902	0.00218381	0.0494667	0.99988	FALSE
DBP	Triglycerides in very large VLDL	Inverse variance weighted	19	-0.00312763	0.00320845	0.329655	0.99988	FALSE
DBP	Triglycerides to total lipids ratio in very large VLDL	Inverse variance weighted	19	-0.000239228	0.00217716	0.912504	0.99988	FALSE
DBP	Total cholesterol in very small VLDL	Inverse variance weighted	19	-0.00154787	0.00231593	0.503905	0.99988	FALSE
DBP	Total cholesterol to total lipids ratio in very small VLDL	Inverse variance weighted	19	0.00212181	0.00265111	0.423509	0.99988	FALSE
DBP	Cholesterol esters in very small VLDL	Inverse variance weighted	19	-0.00158217	0.00223525	0.479053	0.99988	FALSE
DBP	Cholesteryl esters to total lipids ratio in very small VLDL	Inverse variance weighted	19	0.0015765	0.00247171	0.523592	0.99988	FALSE
DBP	Free cholesterol in very small VLDL	Inverse variance weighted	19	-0.00157666	0.00247553	0.524192	0.99988	FALSE
DBP	Free cholesterol to total lipids ratio in very small VLDL	Inverse variance weighted	19	0.00220844	0.00199206	0.267594	0.99988	FALSE
DBP	Total lipids in very small VLDL	Inverse variance weighted	19	-0.00232307	0.00287582	0.41921	0.99988	FALSE
DBP	Concentration of very small VLDL particles	Inverse variance weighted	19	-0.00231835	0.00298573	0.437467	0.99988	FALSE
DBP	Phospholipids in very small VLDL	Inverse variance weighted	19	-0.00245936	0.00265545	0.354366	0.99988	FALSE
DBP	Phospholipids to total lipids ratio in very small VLDL	Inverse variance weighted	19	-0.000958923	0.00196381	0.625339	0.99988	FALSE
DBP	Triglycerides in very small VLDL	Inverse variance weighted	19	-0.00249235	0.00371607	0.502415	0.99988	FALSE
DBP	Triglycerides to total lipids ratio in very small VLDL	Inverse variance weighted	19	-0.000994312	0.00270406	0.713089	0.99988	FALSE
DBP	Total cholesterol levels in chylomicrons and extremely large VLDL	Inverse variance weighted	19	-0.002932	0.00306718	0.33911	0.99988	FALSE
DBP	Total cholesterol to total lipids ratio in chylomicrons and extremely large VLDL	Inverse variance weighted	19	0.00114251	0.00191738	0.551262	0.99988	FALSE
DBP	Cholesteryl ester levels in chylomicrons and extremely large VLDL	Inverse variance weighted	19	-0.0026188	0.00293953	0.372987	0.99988	FALSE
DBP	Cholesteryl esters to total lipids ratio in chylomicrons and extremely large VLDL	Inverse variance weighted	19	0.000298236	0.00239509	0.900904	0.99988	FALSE
DBP	Free cholesterol levels in chylomicrons and extremely large VLDL	Inverse variance weighted	19	-0.00335682	0.00313246	0.28389	0.99988	FALSE
DBP	Free cholesterol to total lipids ratio in chylomicrons and extremely large VLDL	Inverse variance weighted	19	-0.000934111	0.00282696	0.741076	0.99988	FALSE
DBP	Total lipid levels in chylomicrons and extremely large VLDL	Inverse variance weighted	19	-0.00344074	0.00310267	0.267448	0.99988	FALSE
DBP	Concentration of chylomicrons and extremely large VLDL particles	Inverse variance weighted	19	-0.00344619	0.00308234	0.263548	0.99988	FALSE
DBP	Phospholipid levels in chylomicrons and extremely large VLDL	Inverse variance weighted	19	-0.00369041	0.00316738	0.243966	0.99988	FALSE
DBP	Phospholipids to total lipids ratio in chylomicrons and extremely large VLDL	Inverse variance weighted	19	-0.00235921	0.00249379	0.344132	0.99988	FALSE
DBP	Triglyceride levels in chylomicrons and extremely large VLDL	Inverse variance weighted	19	-0.00352569	0.0030883	0.253608	0.99988	FALSE
DBP	Triglycerides to total lipids ratio in chylomicrons and extremely large VLDL	Inverse variance weighted	19	-0.00100278	0.00210215	0.633342	0.99988	FALSE

## Sheet: SBPstep1 result
Exposure	Mediation	method	nsnp	b	se	pval	FDR	FDR_significant
SBP	Acetate levels	Inverse variance weighted	19	-0.00342761	0.00219139	0.117788	0.99988	FALSE
SBP	Acetone levels	Inverse variance weighted	19	-0.00370584	0.00198936	0.0624866	0.99988	FALSE
SBP	Alanine levels	Inverse variance weighted	19	-0.00280149	0.00313999	0.372287	0.99988	FALSE
SBP	Albumin levels	Inverse variance weighted	19	0.000562338	0.00191793	0.769368	0.99988	FALSE
SBP	Apolipoprotein A-I levels	Inverse variance weighted	19	-0.00109166	0.00223474	0.625198	0.99988	FALSE
SBP	Apolipoprotein B levels	Inverse variance weighted	19	-0.00340777	0.00307712	0.268097	0.99988	FALSE
SBP	Ratio of apolipoprotein B to apolipoprotein A1 levels	Inverse variance weighted	19	-0.00288892	0.00364474	0.427994	0.99988	FALSE
SBP	3-Hydroxybutyrate levels	Inverse variance weighted	19	-0.00198906	0.00293893	0.498534	0.99988	FALSE
SBP	Citrate levels	Inverse variance weighted	19	-0.00306615	0.00256769	0.232428	0.99988	FALSE
SBP	Conjugated linoleic acid	Inverse variance weighted	19	-0.000906671	0.00315943	0.774133	0.99988	FALSE
SBP	Ratio of conjugated linoleic acid to total fatty acids	Inverse variance weighted	19	-0.000424874	0.00279925	0.879359	0.99988	FALSE
SBP	Creatinine levels	Inverse variance weighted	19	-2.07e-05	0.00258614	0.993617	0.99988	FALSE
SBP	Diacylglycerol levels	Inverse variance weighted	19	-0.00284262	0.00370831	0.443348	0.99988	FALSE
SBP	Ratio of diacylglycerol to triglycerides	Inverse variance weighted	19	-0.001542	0.00270553	0.568715	0.99988	FALSE
SBP	Docosahexaenoic acid (22:6) levels	Inverse variance weighted	19	-0.00211646	0.0022449	0.345791	0.99988	FALSE
SBP	Ratio of 22:6 docosahexaenoic acid to total fatty acids	Inverse variance weighted	19	0.00049834	0.00189715	0.792799	0.99988	FALSE
SBP	Esterified cholesterol levels	Inverse variance weighted	19	-0.00272496	0.00208283	0.190773	0.99988	FALSE
SBP	Estimated description of fatty acid chain length not actual carbon number	Inverse variance weighted	19	0.000329638	0.00259141	0.898779	0.99988	FALSE
SBP	Omega-3 fatty acids levels	Inverse variance weighted	19	-0.00180054	0.00245309	0.462957	0.99988	FALSE
SBP	Ratio of omega-3 fatty acids to total fatty acids	Inverse variance weighted	19	0.00167675	0.0018495	0.364621	0.99988	FALSE
SBP	Omega-6 fatty acids levels	Inverse variance weighted	19	-0.00259276	0.00227453	0.254323	0.99988	FALSE
SBP	Ratio of omega-6 fatty acids to total fatty acids	Inverse variance weighted	19	0.00325932	0.00299864	0.277067	0.99988	FALSE
SBP	Free cholesterol levels	Inverse variance weighted	19	-0.00182993	0.00184628	0.321615	0.99988	FALSE
SBP	Glucose levels	Inverse variance weighted	19	0.00129371	0.00204369	0.526715	0.99988	FALSE
SBP	Glutamine levels	Inverse variance weighted	19	0.00099242	0.00199088	0.618143	0.99988	FALSE
SBP	Glycerol levels	Inverse variance weighted	19	-0.00398956	0.00389848	0.306136	0.99988	FALSE
SBP	Glycine levels	Inverse variance weighted	19	0.00327523	0.0026866	0.222808	0.99988	FALSE
SBP	Glycoprotein acetylation	Inverse variance weighted	19	-0.00159001	0.00288963	0.582149	0.99988	FALSE
SBP	Total cholesterol in HDL2	Inverse variance weighted	19	0.00094179	0.00305605	0.757951	0.99988	FALSE
SBP	Total cholesterol in HDL3	Inverse variance weighted	19	-0.000345738	0.0020761	0.867738	0.99988	FALSE
SBP	Total cholesterol levels in HDL	Inverse variance weighted	19	0.000659027	0.00292783	0.821909	0.99988	FALSE
SBP	Mean diameter of HDL particles	Inverse variance weighted	19	0.00183968	0.00335021	0.582921	0.99988	FALSE
SBP	Triglyceride levels in HDL	Inverse variance weighted	19	-0.0018791	0.00265438	0.478993	0.99988	FALSE
SBP	Histidine levels	Inverse variance weighted	19	-0.00422281	0.00186683	0.0236961	0.99988	FALSE
SBP	Total Cholesterol in IDL	Inverse variance weighted	19	-0.00199494	0.00209502	0.34098	0.99988	FALSE
SBP	Cholesteryl esters to total lipids ratio in IDL	Inverse variance weighted	19	-0.000145831	0.00187356	0.937958	0.99988	FALSE
SBP	Cholesterol esters in IDL	Inverse variance weighted	19	-0.0021329	0.00218764	0.329571	0.99988	FALSE
SBP	Cholesteryl esters to total lipids ratio in IDL	Inverse variance weighted	19	-0.000680327	0.00190266	0.720667	0.99988	FALSE
SBP	Free cholesterol in IDL	Inverse variance weighted	19	-0.00164584	0.00184829	0.373214	0.99988	FALSE
SBP	Free cholesterol to total lipids ratio in IDL	Inverse variance weighted	19	0.000489309	0.00233	0.833665	0.99988	FALSE
SBP	Total lipids in IDL	Inverse variance weighted	19	-0.0023377	0.0022798	0.305176	0.99988	FALSE
SBP	Concentration of IDL particles	Inverse variance weighted	19	-0.00248768	0.00239033	0.298002	0.99988	FALSE
SBP	Phospholipids in IDL	Inverse variance weighted	19	-0.0022743	0.00220818	0.303037	0.99988	FALSE
SBP	Phospholipids to total lipids ratio in IDL	Inverse variance weighted	19	0.000246057	0.00235357	0.916736	0.99988	FALSE
SBP	Triglycerides in IDL	Inverse variance weighted	19	-0.0022952	0.00335908	0.494428	0.99988	FALSE
SBP	Triglycerides to total lipids ratio in IDL	Inverse variance weighted	19	-0.00130795	0.00222892	0.557334	0.99988	FALSE
SBP	Isoleucine levels	Inverse variance weighted	19	-0.00243461	0.00255706	0.341041	0.99988	FALSE
SBP	Linoleic acid (18:2) levels	Inverse variance weighted	19	-0.00210895	0.00204805	0.303134	0.99988	FALSE
SBP	Ratio of 18:2 linoleic acid to total fatty acids	Inverse variance weighted	19	0.00363398	0.00277128	0.189756	0.99988	FALSE
SBP	Lactate levels	Inverse variance weighted	19	-0.000479249	0.00294665	0.870801	0.99988	FALSE
SBP	Total cholesterol levels in LDL	Inverse variance weighted	19	-0.00216371	0.0022545	0.337192	0.99988	FALSE
SBP	Mean diameter of LDL particles	Inverse variance weighted	19	0.00136954	0.00206092	0.506353	0.99988	FALSE
SBP	Triglyceride levels in LDL	Inverse variance weighted	19	-0.00230837	0.00319643	0.47019	0.99988	FALSE
SBP	Leucine levels	Inverse variance weighted	19	-0.00432747	0.0024673	0.0794431	0.99988	FALSE
SBP	Total cholesterol in large HDL	Inverse variance weighted	19	0.00257138	0.00331435	0.437847	0.99988	FALSE
SBP	Total cholesterol to total lipids ratio in large HDL	Inverse variance weighted	19	0.00355396	0.0030174	0.238868	0.99988	FALSE
SBP	Cholesterol esters in large HDL	Inverse variance weighted	19	0.0025048	0.00329509	0.447159	0.99988	FALSE
SBP	Cholesteryl esters to total lipids ratio in large HDL	Inverse variance weighted	19	0.00310124	0.00274804	0.259096	0.99988	FALSE
SBP	Free cholesterol in large HDL	Inverse variance weighted	19	0.00269681	0.0033612	0.422359	0.99988	FALSE
SBP	Free cholesterol to total lipids ratio in large HDL	Inverse variance weighted	19	0.00260132	0.00280925	0.354455	0.99988	FALSE
SBP	Total lipids in large HDL	Inverse variance weighted	19	0.00218888	0.00319294	0.493004	0.99988	FALSE
SBP	Concentration of large HDL particles	Inverse variance weighted	19	0.00209441	0.00316811	0.508554	0.99988	FALSE
SBP	Phospholipids in large HDL	Inverse variance weighted	19	0.00158277	0.00309813	0.609437	0.99988	FALSE
SBP	Phospholipids to total lipids ratio in large HDL	Inverse variance weighted	19	-0.00403696	0.00255511	0.114118	0.99988	FALSE
SBP	Triglycerides in large HDL	Inverse variance weighted	19	0.00153449	0.00211114	0.467314	0.99988	FALSE
SBP	Triglycerides to total lipids ratio in large HDL	Inverse variance weighted	19	-0.0015016	0.00226371	0.507115	0.99988	FALSE
SBP	Total cholesterol in large LDL	Inverse variance weighted	19	-0.00222784	0.00224093	0.320145	0.99988	FALSE
SBP	Total cholesterol to total lipids ratio in large LDL	Inverse variance weighted	19	-0.000769632	0.00185417	0.678082	0.99988	FALSE
SBP	Cholesterol esters in large LDL	Inverse variance weighted	19	-0.00244801	0.00234989	0.297525	0.99988	FALSE
SBP	Cholesteryl esters to total lipids ratio in large LDL	Inverse variance weighted	19	-0.0019851	0.00214203	0.354063	0.99988	FALSE
SBP	Free cholesterol in large LDL	Inverse variance weighted	19	-0.00163218	0.00189599	0.389317	0.99988	FALSE
SBP	Free cholesterol to total lipids ratio in large LDL	Inverse variance weighted	19	0.00395585	0.0032988	0.230458	0.99988	FALSE
SBP	Total lipids in large LDL	Inverse variance weighted	19	-0.00245505	0.0023352	0.29311	0.99988	FALSE
SBP	Concentration of large LDL particles	Inverse variance weighted	19	-0.00257472	0.00240751	0.284865	0.99988	FALSE
SBP	Phospholipids in large LDL	Inverse variance weighted	19	-0.00255233	0.00227589	0.262091	0.99988	FALSE
SBP	Phospholipids to total lipids ratio in large LDL	Inverse variance weighted	19	0.00133037	0.0023701	0.574584	0.99988	FALSE
SBP	Triglycerides in large LDL	Inverse variance weighted	19	-0.00185302	0.00311007	0.5513	0.99988	FALSE
SBP	Triglycerides to total lipids ratio in large LDL	Inverse variance weighted	19	0.000641485	0.00217039	0.767565	0.99988	FALSE
SBP	Total Cholesterol in large VLDL	Inverse variance weighted	19	-0.00273587	0.00334242	0.413056	0.99988	FALSE
SBP	Total cholesterol to total lipids ratio in large VLDL	Inverse variance weighted	19	2.26e-05	0.00193329	0.990666	0.99988	FALSE
SBP	Cholesterol esters in large VLDL	Inverse variance weighted	19	-0.00261365	0.00333634	0.433399	0.99988	FALSE
SBP	Cholesteryl esters to total lipids ratio in large VLDL	Inverse variance weighted	19	-0.000406898	0.00205113	0.84275	0.99988	FALSE
SBP	Free cholesterol in large VLDL	Inverse variance weighted	19	-0.0028143	0.00325109	0.386684	0.99988	FALSE
SBP	Free cholesterol to total lipids ratio in large VLDL	Inverse variance weighted	19	-0.00179048	0.00257681	0.487153	0.99988	FALSE
SBP	Total lipids in large VLDL	Inverse variance weighted	19	-0.00299691	0.00332983	0.36811	0.99988	FALSE
SBP	Concentration of large VLDL particles	Inverse variance weighted	19	-0.00300456	0.00331588	0.364877	0.99988	FALSE
SBP	Phospholipids in large VLDL	Inverse variance weighted	19	-0.00306527	0.00330438	0.353595	0.99988	FALSE
SBP	Phospholipids to total lipids ratio in large VLDL	Inverse variance weighted	19	-0.00212054	0.00223169	0.342014	0.99988	FALSE
SBP	Triglycerides in large VLDL	Inverse variance weighted	19	-0.00298889	0.0033002	0.365112	0.99988	FALSE
SBP	Triglycerides to total lipids ratio in large VLDL	Inverse variance weighted	19	-0.000147685	0.00192862	0.938961	0.99988	FALSE
SBP	Total cholesterol levels in medium HDL	Inverse variance weighted	19	-0.00142905	0.00212732	0.501736	0.99988	FALSE
SBP	Total cholesterol to total lipids ratio in medium HDL	Inverse variance weighted	19	-8.61e-05	0.00277946	0.975299	0.99988	FALSE
SBP	Cholesterol esters in medium HDL	Inverse variance weighted	19	-0.00135013	0.00215765	0.531483	0.99988	FALSE
SBP	Cholesteryl esters to total lipids ratio in medium HDL	Inverse variance weighted	19	0.000166622	0.0027803	0.952212	0.99988	FALSE
SBP	Free cholesterol in medium HDL	Inverse variance weighted	19	-0.00120112	0.00207316	0.562342	0.99988	FALSE
SBP	Free cholesterol to total lipids ratio in medium HDL	Inverse variance weighted	19	-0.000966199	0.00220914	0.661848	0.99988	FALSE
SBP	Total lipids in medium HDL	Inverse variance weighted	19	-0.00186234	0.001984	0.347896	0.99988	FALSE
SBP	Concentration of medium HDL particles	Inverse variance weighted	19	-0.0018985	0.00195275	0.330942	0.99988	FALSE
SBP	Phospholipids in medium HDL	Inverse variance weighted	19	-0.00162798	0.00203968	0.424781	0.99988	FALSE
SBP	Phospholipids to total lipids ratio in medium HDL	Inverse variance weighted	19	0.00134182	0.00200006	0.50229	0.99988	FALSE
SBP	Triglycerides in medium HDL	Inverse variance weighted	19	-0.00293754	0.00319521	0.357909	0.99988	FALSE
SBP	Triglycerides to total lipids ratio in medium HDL	Inverse variance weighted	19	-0.00212826	0.00312647	0.496046	0.99988	FALSE
SBP	Total cholesterol in medium LDL	Inverse variance weighted	19	-0.00205	0.00233855	0.380699	0.99988	FALSE
SBP	Total cholesterol to total lipids ratio in medium LDL	Inverse variance weighted	19	-0.000418152	0.00184372	0.820581	0.99988	FALSE
SBP	Cholesterol esters in medium LDL	Inverse variance weighted	19	-0.0020382	0.00234653	0.385064	0.99988	FALSE
SBP	Cholesteryl esters to total lipids ratio in medium LDL	Inverse variance weighted	19	-0.000691229	0.00184381	0.707741	0.99988	FALSE
SBP	Free cholesterol in medium LDL	Inverse variance weighted	19	-0.0021678	0.00231764	0.349608	0.99988	FALSE
SBP	Free cholesterol to total lipids ratio in medium LDL	Inverse variance weighted	19	0.00218401	0.00278527	0.432965	0.99988	FALSE
SBP	Total lipid levels in medium LDL	Inverse variance weighted	19	-0.00246482	0.00250795	0.325705	0.99988	FALSE
SBP	Concentration of medium LDL particles	Inverse variance weighted	19	-0.00252792	0.00255297	0.322082	0.99988	FALSE
SBP	Phospholipids in medium LDL	Inverse variance weighted	19	-0.00323835	0.00269007	0.228661	0.99988	FALSE
SBP	Phospholipids to total lipids ratio in medium LDL	Inverse variance weighted	19	0.000396321	0.00201628	0.844172	0.99988	FALSE
SBP	Triglycerides in medium LDL	Inverse variance weighted	19	-0.00199059	0.00304142	0.512793	0.99988	FALSE
SBP	Triglycerides to total lipids ratio in medium LDL	Inverse variance weighted	19	0.000251941	0.00225897	0.911197	0.99988	FALSE
SBP	Monounsaturated fatty acids (16:1, 18:1) levels	Inverse variance weighted	19	-0.00484832	0.00311515	0.119621	0.99988	FALSE
SBP	Ratio of monounsaturated fatty acids to total fatty acids	Inverse variance weighted	19	-0.00304693	0.0023462	0.194059	0.99988	FALSE
SBP	Total cholesterol in medium VLDL	Inverse variance weighted	19	-0.00265989	0.00328584	0.418228	0.99988	FALSE
SBP	Total cholesterol to total lipids ratio in medium VLDL	Inverse variance weighted	19	-0.000641232	0.00228784	0.779264	0.99988	FALSE
SBP	Cholesterol esters in medium VLDL	Inverse variance weighted	19	-0.00268573	0.00304083	0.377115	0.99988	FALSE
SBP	Cholesteryl esters to total lipids ratio in medium VLDL	Inverse variance weighted	19	-0.00032306	0.00258522	0.900552	0.99988	FALSE
SBP	Free cholesterol in medium VLDL	Inverse variance weighted	19	-0.00258238	0.00348079	0.458151	0.99988	FALSE
SBP	Free cholesterol to total lipids ratio in medium VLDL	Inverse variance weighted	19	-0.00182622	0.00275294	0.507095	0.99988	FALSE
SBP	Total lipids in medium VLDL	Inverse variance weighted	19	-0.00267814	0.00354145	0.449514	0.99988	FALSE
SBP	Concentration of medium VLDL particles	Inverse variance weighted	19	-0.00269582	0.00356436	0.449454	0.99988	FALSE
SBP	Phospholipids in medium VLDL	Inverse variance weighted	19	-0.00265791	0.00357201	0.456819	0.99988	FALSE
SBP	Phospholipids to total lipids ratio in medium VLDL	Inverse variance weighted	19	0.00142326	0.00258779	0.582327	0.99988	FALSE
SBP	Triglycerides in medium VLDL	Inverse variance weighted	19	-0.0025865	0.00357149	0.468939	0.99988	FALSE
SBP	Triglycerides to total lipids ratio in medium VLDL	Inverse variance weighted	19	-0.000315976	0.00218586	0.885063	0.99988	FALSE
SBP	Phosphatidylcholine and other choline levels	Inverse variance weighted	19	-0.00332693	0.00193427	0.0854346	0.99988	FALSE
SBP	Phenylalanine levels	Inverse variance weighted	19	-0.00356428	0.00198614	0.072722	0.99988	FALSE
SBP	Polyunsaturated fatty acids	Inverse variance weighted	19	-0.00274551	0.00236831	0.246347	0.99988	FALSE
SBP	Ratio of polyunsaturated fatty acids to total fatty acids	Inverse variance weighted	19	0.00327407	0.00274513	0.232994	0.99988	FALSE
SBP	Pyruvate levels	Inverse variance weighted	19	0.00271024	0.00280877	0.334586	0.99988	FALSE
SBP	Remnant cholesterol (non-HDL, non-LDL -cholesterol)	Inverse variance weighted	19	-0.00308962	0.00285455	0.279097	0.99988	FALSE
SBP	Serum total cholesterol levels	Inverse variance weighted	19	-0.00251285	0.00199885	0.2087	0.99988	FALSE
SBP	Serum total triglyceride levels	Inverse variance weighted	19	-0.00294974	0.00363522	0.417117	0.99988	FALSE
SBP	Saturated fatty acids	Inverse variance weighted	19	-0.00482808	0.00315413	0.12584	0.99988	FALSE
SBP	Ratio of saturated fatty acids to total fatty acids	Inverse variance weighted	19	-0.00237358	0.00183488	0.195808	0.99988	FALSE
SBP	Total cholesterol levels in small HDL	Inverse variance weighted	19	0.000438384	0.00203073	0.829086	0.99988	FALSE
SBP	Total cholesterol to total lipids ratio in small HDL	Inverse variance weighted	19	-1.87e-05	0.0018475	0.991917	0.99988	FALSE
SBP	Cholesterol esters in small HDL	Inverse variance weighted	19	-9.04e-06	0.00200701	0.996406	0.99988	FALSE
SBP	Cholesteryl esters to total lipids ratio in small HDL	Inverse variance weighted	19	-0.000310047	0.00184816	0.866772	0.99988	FALSE
SBP	Free cholesterol in small HDL	Inverse variance weighted	19	9.44e-06	0.00213424	0.996471	0.99988	FALSE
SBP	Free cholesterol to total lipids ratio in small HDL	Inverse variance weighted	19	0.00162184	0.00228057	0.47699	0.99988	FALSE
SBP	Total lipids in small HDL	Inverse variance weighted	19	-0.00163771	0.00227795	0.472178	0.99988	FALSE
SBP	Concentration of small HDL particles	Inverse variance weighted	19	-0.00191554	0.00239133	0.423112	0.99988	FALSE
SBP	Phospholipids in small HDL	Inverse variance weighted	19	-0.00155975	0.00203978	0.444471	0.99988	FALSE
SBP	Phospholipids to total lipids ratio in small HDL	Inverse variance weighted	19	-0.000152246	0.00188094	0.935488	0.99988	FALSE
SBP	Triglycerides in small HDL	Inverse variance weighted	19	-0.00142735	0.0035973	0.691528	0.99988	FALSE
SBP	Triglycerides to total lipids ratio in small HDL	Inverse variance weighted	19	-0.00142441	0.00300621	0.635626	0.99988	FALSE
SBP	Total Cholesterol in small LDL	Inverse variance weighted	19	-0.00180958	0.00228916	0.429235	0.99988	FALSE
SBP	Total cholesterol to total lipids ratio in small LDL	Inverse variance weighted	19	-0.000645086	0.00184413	0.726485	0.99988	FALSE
SBP	Cholesterol esters in small LDL	Inverse variance weighted	19	-0.00168931	0.00227115	0.456992	0.99988	FALSE
SBP	Cholesteryl esters to total lipids ratio in small LDL	Inverse variance weighted	19	-0.00063779	0.00184274	0.72926	0.99988	FALSE
SBP	Free cholesterol in small LDL	Inverse variance weighted	19	-0.0022016	0.00237621	0.354176	0.99988	FALSE
SBP	Free cholesterol to total lipids ratio in small LDL	Inverse variance weighted	19	0.00236807	0.00268516	0.377824	0.99988	FALSE
SBP	Total lipids in small LDL	Inverse variance weighted	19	-0.00239796	0.00253193	0.343594	0.99988	FALSE
SBP	Concentration of small LDL particles	Inverse variance weighted	19	-0.00248505	0.00262057	0.342984	0.99988	FALSE
SBP	Phospholipids in small LDL	Inverse variance weighted	19	-0.00332044	0.00268642	0.216455	0.99988	FALSE
SBP	Phospholipids to total lipids ratio in small LDL	Inverse variance weighted	19	0.000784363	0.00208212	0.706387	0.99988	FALSE
SBP	Triglycerides in small LDL	Inverse variance weighted	19	-0.00257555	0.00330667	0.436043	0.99988	FALSE
SBP	Triglycerides to total lipids ratio in small LDL	Inverse variance weighted	19	-0.000942717	0.00252056	0.708397	0.99988	FALSE
SBP	Sphingomyelins levels	Inverse variance weighted	19	-0.00137608	0.00189896	0.468668	0.99988	FALSE
SBP	Total cholesterol in small VLDL	Inverse variance weighted	19	-0.00174175	0.00298913	0.560098	0.99988	FALSE
SBP	Total cholesterol to total lipids ratio in small VLDL	Inverse variance weighted	19	0.000820589	0.00226688	0.717359	0.99988	FALSE
SBP	Cholesterol esters in small VLDL	Inverse variance weighted	19	-0.00123126	0.00268475	0.646512	0.99988	FALSE
SBP	Cholesteryl esters to total lipids ratio in small VLDL	Inverse variance weighted	19	0.000719592	0.0021807	0.741413	0.99988	FALSE
SBP	Free cholesterol in small VLDL	Inverse variance weighted	19	-0.00213141	0.00334897	0.524492	0.99988	FALSE
SBP	Free cholesterol to total lipids ratio in small VLDL	Inverse variance weighted	19	0.00116045	0.00262513	0.658451	0.99988	FALSE
SBP	Total lipids in small VLDL	Inverse variance weighted	19	-0.00225764	0.00350045	0.518954	0.99988	FALSE
SBP	Concentration of small VLDL particles	Inverse variance weighted	19	-0.00214187	0.00357262	0.548824	0.99988	FALSE
SBP	Phospholipids in small VLDL	Inverse variance weighted	19	-0.00235217	0.00353946	0.506335	0.99988	FALSE
SBP	Phospholipids to total lipids ratio in small VLDL	Inverse variance weighted	19	0.00201601	0.00282123	0.474866	0.99988	FALSE
SBP	Triglycerides in small VLDL	Inverse variance weighted	19	-0.00210141	0.00368345	0.568338	0.99988	FALSE
SBP	Triglycerides to total lipids ratio in small VLDL	Inverse variance weighted	19	-0.000925127	0.002719	0.733672	0.99988	FALSE
SBP	Ratio of triglycerides to phosphoglycerides	Inverse variance weighted	19	-0.00331109	0.00327935	0.312649	0.99988	FALSE
SBP	Total cholines levels	Inverse variance weighted	19	-0.00318608	0.00201001	0.112942	0.99988	FALSE
SBP	Total fatty acids	Inverse variance weighted	19	-0.00459588	0.00304143	0.130765	0.99988	FALSE
SBP	Total phosphoglycerides levels	Inverse variance weighted	19	-0.00341289	0.00219722	0.120358	0.99988	FALSE
SBP	Tyrosine levels	Inverse variance weighted	19	-0.000671483	0.00212068	0.75152	0.99988	FALSE
SBP	Estimated degree of unsaturation	Inverse variance weighted	19	0.00358759	0.00206337	0.0820863	0.99988	FALSE
SBP	Valine levels	Inverse variance weighted	19	-0.00169294	0.00221962	0.445633	0.99988	FALSE
SBP	Total cholesterol levels in VLDL	Inverse variance weighted	19	-0.00270645	0.00319668	0.397194	0.99988	FALSE
SBP	Mean diameter of VLDL particles	Inverse variance weighted	19	-0.00189695	0.00313424	0.545023	0.99988	FALSE
SBP	Triglyceride levels in VLDL	Inverse variance weighted	19	-0.00261528	0.00361149	0.468971	0.99988	FALSE
SBP	Total cholesterol levels in very large HDL	Inverse variance weighted	19	0.00143192	0.00235883	0.543818	0.99988	FALSE
SBP	Total cholesterol to total lipids ratio in very large HDL	Inverse variance weighted	19	-0.00132334	0.00300339	0.65949	0.99988	FALSE
SBP	Cholesterol esters in very large HDL	Inverse variance weighted	19	0.00135326	0.00220885	0.540104	0.99988	FALSE
SBP	Cholesteryl esters to total lipids ratio in very large HDL	Inverse variance weighted	19	-0.00168157	0.00297278	0.571628	0.99988	FALSE
SBP	Free cholesterol in very large HDL	Inverse variance weighted	19	0.00186527	0.00263141	0.478418	0.99988	FALSE
SBP	Free cholesterol to total lipids ratio in very large HDL	Inverse variance weighted	19	0.000308262	0.00250944	0.902233	0.99988	FALSE
SBP	Total lipids in very large HDL	Inverse variance weighted	19	0.00190656	0.00290586	0.511755	0.99988	FALSE
SBP	Concentration of very large HDL particles	Inverse variance weighted	19	0.00197924	0.00294682	0.501806	0.99988	FALSE
SBP	Phospholipids in very large HDL	Inverse variance weighted	19	0.00238364	0.00338447	0.481254	0.99988	FALSE
SBP	Phospholipids to total lipids ratio in very large HDL	Inverse variance weighted	19	0.00144743	0.00324609	0.65567	0.99988	FALSE
SBP	Triglycerides in very large HDL	Inverse variance weighted	19	-0.000930295	0.00188612	0.621848	0.99988	FALSE
SBP	Triglycerides to total lipids ratio in very large HDL	Inverse variance weighted	19	-0.00332578	0.00251683	0.186363	0.99988	FALSE
SBP	Total cholesterol in very large VLDL	Inverse variance weighted	19	-0.0025262	0.00313416	0.420231	0.99988	FALSE
SBP	Total cholesterol to total lipids ratio in very large VLDL	Inverse variance weighted	19	0.000564744	0.00233667	0.809023	0.99988	FALSE
SBP	Cholesterol esters in very large VLDL	Inverse variance weighted	19	-0.00236738	0.00312926	0.449332	0.99988	FALSE
SBP	Cholesteryl esters to total lipids ratio in very large VLDL	Inverse variance weighted	19	0.000456364	0.00203609	0.82265	0.99988	FALSE
SBP	Free cholesterol in very large VLDL	Inverse variance weighted	19	-0.00275896	0.00312001	0.376547	0.99988	FALSE
SBP	Free cholesterol to total lipids ratio in very large VLDL	Inverse variance weighted	19	-0.00152507	0.00253617	0.547622	0.99988	FALSE
SBP	Total lipids in very large VLDL	Inverse variance weighted	19	-0.0029977	0.0031924	0.347725	0.99988	FALSE
SBP	Concentration of very large VLDL particles	Inverse variance weighted	19	-0.00309976	0.0031899	0.331179	0.99988	FALSE
SBP	Phospholipids in very large VLDL	Inverse variance weighted	19	-0.00322138	0.00317044	0.309597	0.99988	FALSE
SBP	Phospholipids to total lipids ratio in very large VLDL	Inverse variance weighted	19	-0.0042902	0.00218381	0.0494667	0.99988	FALSE
SBP	Triglycerides in very large VLDL	Inverse variance weighted	19	-0.00312763	0.00320845	0.329655	0.99988	FALSE
SBP	Triglycerides to total lipids ratio in very large VLDL	Inverse variance weighted	19	-0.000239228	0.00217716	0.912504	0.99988	FALSE
SBP	Total cholesterol in very small VLDL	Inverse variance weighted	19	-0.00154787	0.00231593	0.503905	0.99988	FALSE
SBP	Total cholesterol to total lipids ratio in very small VLDL	Inverse variance weighted	19	0.00212181	0.00265111	0.423509	0.99988	FALSE
SBP	Cholesterol esters in very small VLDL	Inverse variance weighted	19	-0.00158217	0.00223525	0.479053	0.99988	FALSE
SBP	Cholesteryl esters to total lipids ratio in very small VLDL	Inverse variance weighted	19	0.0015765	0.00247171	0.523592	0.99988	FALSE
SBP	Free cholesterol in very small VLDL	Inverse variance weighted	19	-0.00157666	0.00247553	0.524192	0.99988	FALSE
SBP	Free cholesterol to total lipids ratio in very small VLDL	Inverse variance weighted	19	0.00220844	0.00199206	0.267594	0.99988	FALSE
SBP	Total lipids in very small VLDL	Inverse variance weighted	19	-0.00232307	0.00287582	0.41921	0.99988	FALSE
SBP	Concentration of very small VLDL particles	Inverse variance weighted	19	-0.00231835	0.00298573	0.437467	0.99988	FALSE
SBP	Phospholipids in very small VLDL	Inverse variance weighted	19	-0.00245936	0.00265545	0.354366	0.99988	FALSE
SBP	Phospholipids to total lipids ratio in very small VLDL	Inverse variance weighted	19	-0.000958923	0.00196381	0.625339	0.99988	FALSE
SBP	Triglycerides in very small VLDL	Inverse variance weighted	19	-0.00249235	0.00371607	0.502415	0.99988	FALSE
SBP	Triglycerides to total lipids ratio in very small VLDL	Inverse variance weighted	19	-0.000994312	0.00270406	0.713089	0.99988	FALSE
SBP	Total cholesterol levels in chylomicrons and extremely large VLDL	Inverse variance weighted	19	-0.002932	0.00306718	0.33911	0.99988	FALSE
SBP	Total cholesterol to total lipids ratio in chylomicrons and extremely large VLDL	Inverse variance weighted	19	0.00114251	0.00191738	0.551262	0.99988	FALSE
SBP	Cholesteryl ester levels in chylomicrons and extremely large VLDL	Inverse variance weighted	19	-0.0026188	0.00293953	0.372987	0.99988	FALSE
SBP	Cholesteryl esters to total lipids ratio in chylomicrons and extremely large VLDL	Inverse variance weighted	19	0.000298236	0.00239509	0.900904	0.99988	FALSE
SBP	Free cholesterol levels in chylomicrons and extremely large VLDL	Inverse variance weighted	19	-0.00335682	0.00313246	0.28389	0.99988	FALSE
SBP	Free cholesterol to total lipids ratio in chylomicrons and extremely large VLDL	Inverse variance weighted	19	-0.000934111	0.00282696	0.741076	0.99988	FALSE
SBP	Total lipid levels in chylomicrons and extremely large VLDL	Inverse variance weighted	19	-0.00344074	0.00310267	0.267448	0.99988	FALSE
SBP	Concentration of chylomicrons and extremely large VLDL particles	Inverse variance weighted	19	-0.00344619	0.00308234	0.263548	0.99988	FALSE
SBP	Phospholipid levels in chylomicrons and extremely large VLDL	Inverse variance weighted	19	-0.00369041	0.00316738	0.243966	0.99988	FALSE
SBP	Phospholipids to total lipids ratio in chylomicrons and extremely large VLDL	Inverse variance weighted	19	-0.00235921	0.00249379	0.344132	0.99988	FALSE
SBP	Triglyceride levels in chylomicrons and extremely large VLDL	Inverse variance weighted	19	-0.00352569	0.0030883	0.253608	0.99988	FALSE
SBP	Triglycerides to total lipids ratio in chylomicrons and extremely large VLDL	Inverse variance weighted	19	-0.00100278	0.00210215	0.633342	0.99988	FALSE
