# Supplementary material for: Causal Inference of Metabolic Syndrome on Calcific Aortic Valve Stenosis: Linkage Disequilibrium Score Regression and Two-Sample, Two-Step Mendelian Randomization Analysis
Source: Research Square preprint supplement (doi:10.21203/rs.3.rs-7141693/v1), 2025-08-22
Supplement: Supplementary file 2 [file 937a421e9bb98f8f4c8342fc.xlsx]

## Sheet: Mets result
Exposure	Outcome	Mediation	β1	pval1	β2	pval2
Mets	CAVS	Apolipoprotein B levels	0.384797	1.63e-29	0.337865	4.42e-13
Mets	CAVS	Ratio of diacylglycerol to triglycerides	0.216595	1.88e-14	0.548684	8.55e-05
Mets	CAVS	Ratio of 22:6 docosahexaenoic acid to total fatty acids	-0.195716	9.06e-06	0.3607	3.87e-10
Mets	CAVS	Estimated description of fatty acid chain length not actual carbon number	0.327843	3.6e-30	-0.318365	0.0496
Mets	CAVS	Ratio of omega-3 fatty acids to total fatty acids	-0.216559	0.000156	0.245942	3e-06
Mets	CAVS	Triglyceride levels in HDL	0.345649	6.86e-18	0.232973	0.00339
Mets	CAVS	Concentration of IDL particles	0.0961804	0.00485	0.345257	3.56e-17
Mets	CAVS	Phospholipids to total lipids ratio in IDL	-0.326494	3.44e-24	-0.39031	0.00131
Mets	CAVS	Triglycerides in IDL	0.437534	1.24e-27	0.300871	2.21e-09
Mets	CAVS	Triglyceride levels in LDL	0.321503	2.51e-17	0.31712	1.01e-10
Mets	CAVS	Total cholesterol to total lipids ratio in large HDL	-0.671788	9.92e-98	-0.261682	0.000139
Mets	CAVS	Cholesteryl esters to total lipids ratio in large HDL	-0.51467	7.61e-66	-0.313981	6.66e-05
Mets	CAVS	Triglycerides in large HDL	-0.365397	1.28e-17	0.156297	0.00329
Mets	CAVS	Total cholesterol to total lipids ratio in large LDL	-0.179935	1.6e-08	0.212993	0.00451
Mets	CAVS	Free cholesterol to total lipids ratio in large LDL	-0.617085	2.02e-70	-0.220867	0.0153
Mets	CAVS	Phospholipids to total lipids ratio in large LDL	-0.121396	0.000135	-0.3453	5.87e-09
Mets	CAVS	Triglycerides in large LDL	0.305685	2.82e-15	0.359368	9.81e-14
Mets	CAVS	Triglycerides in medium HDL	0.516801	7.12e-44	0.226729	0.00441
Mets	CAVS	Free cholesterol to total lipids ratio in medium LDL	-0.241875	1.26e-15	-0.374684	6.4e-09
Mets	CAVS	Phospholipids in medium LDL	0.182924	1.28e-08	0.333937	2.38e-12
Mets	CAVS	Triglycerides in medium LDL	0.260973	6.04e-13	0.338767	7.56e-11
Mets	CAVS	Monounsaturated fatty acids (16:1, 18:1) levels	0.453593	4.38e-37	0.258583	0.00677
Mets	CAVS	Total cholesterol in medium VLDL	0.628938	8.7e-68	0.185895	0.0277
Mets	CAVS	Total cholesterol to total lipids ratio in medium VLDL	-0.36175	2.93e-25	0.401538	0.000108
Mets	CAVS	Cholesterol esters in medium VLDL	0.56059	5.16e-56	0.236906	0.00509
Mets	CAVS	Cholesteryl esters to total lipids ratio in medium VLDL	-0.461348	4.76e-39	0.335795	0.000821
Mets	CAVS	Free cholesterol to total lipids ratio in medium VLDL	0.341539	1.05e-23	0.259222	0.0111
Mets	CAVS	Phospholipids to total lipids ratio in medium VLDL	-0.401313	1.56e-43	0.319297	0.0218
Mets	CAVS	Triglycerides to total lipids ratio in medium VLDL	0.390636	4.37e-29	-0.418925	8.14e-06
Mets	CAVS	Phosphatidylcholine and other choline levels	-0.168443	1.43e-05	0.356107	5.33e-11
Mets	CAVS	Remnant cholesterol (non-HDL, non-LDL -cholesterol)	0.359466	7.75e-26	0.3883	4.76e-17
Mets	CAVS	Serum total triglyceride levels	0.689492	2.92e-76	0.172999	0.042
Mets	CAVS	Saturated fatty acids	0.248841	5.25e-12	0.400034	1.04e-05
Mets	CAVS	Total cholesterol to total lipids ratio in small HDL	-0.210517	3.01e-15	0.350206	5.7e-05
Mets	CAVS	Cholesteryl esters to total lipids ratio in small HDL	-0.164362	6.6e-10	0.341002	5.87e-05
Mets	CAVS	Free cholesterol to total lipids ratio in small LDL	-0.215634	6.68e-13	-0.373617	4.45e-09
Mets	CAVS	Phospholipids in small LDL	0.107915	0.00136	0.331418	8.2e-11
Mets	CAVS	Triglycerides in small LDL	0.411288	1.12e-29	0.307969	3.26e-05
Mets	CAVS	Sphingomyelins levels	-0.216866	5.85e-11	0.377651	4.22e-13
Mets	CAVS	Total cholesterol in small VLDL	0.503552	8.31e-48	0.368595	1.09e-11
Mets	CAVS	Total cholesterol to total lipids ratio in small VLDL	-0.442512	5.8e-40	0.270927	0.00582
Mets	CAVS	Cholesterol esters in small VLDL	0.418613	4.38e-37	0.42221	1.35e-18
Mets	CAVS	Cholesteryl esters to total lipids ratio in small VLDL	-0.417479	1.56e-34	0.23489	0.0118
Mets	CAVS	Free cholesterol to total lipids ratio in small VLDL	-0.35071	2.52e-31	0.35217	0.00112
Mets	CAVS	Total cholines levels	-0.196152	2.16e-07	0.342831	3.71e-10
Mets	CAVS	Total fatty acids	0.272977	3.07e-13	0.366522	6.63e-06
Mets	CAVS	Total phosphoglycerides levels	-0.125638	0.00112	0.355236	3.26e-10
Mets	CAVS	Total cholesterol levels in VLDL	0.554807	4.9e-56	0.278374	0.000234
Mets	CAVS	Total cholesterol to total lipids ratio in very large VLDL	-0.310651	3.2e-28	0.420366	0.0417
Mets	CAVS	Free cholesterol to total lipids ratio in very large VLDL	-0.272251	4.86e-26	0.586885	7.67e-06
Mets	CAVS	Triglycerides to total lipids ratio in very large VLDL	0.307196	3.46e-26	-0.554964	0.00265
Mets	CAVS	Total cholesterol in very small VLDL	0.194807	4.77e-09	0.404312	6.92e-17
Mets	CAVS	Cholesterol esters in very small VLDL	0.197463	9.57e-10	0.434245	1.06e-17
Mets	CAVS	Free cholesterol in very small VLDL	0.169625	7.84e-07	0.412581	3.48e-23
Mets	CAVS	Total lipids in very small VLDL	0.334142	2.5e-21	0.393194	7.05e-22
Mets	CAVS	Concentration of very small VLDL particles	0.375062	1.09e-25	0.394369	7.15e-23

## Sheet: WC result
Exposure	Outcome	Mediation	β1	pval1	β2	pval2
WC	CAVS	Alanine levels	0.0835184	0.000425308	0.325402	3.94e-08
WC	CAVS	Apolipoprotein B levels	0.111499	0.0235958	0.337865	4.42e-13
WC	CAVS	Ratio of apolipoprotein B to apolipoprotein A1 levels	0.246967	1.7e-07	0.272179	1.34e-09
WC	CAVS	Estimated description of fatty acid chain length not actual carbon number	0.192915	2.25e-09	-0.318365	0.0495732
WC	CAVS	Total cholesterol in HDL3	-0.124515	7.41e-08	0.237515	0.00336108
WC	CAVS	Phospholipids to total lipids ratio in IDL	-0.128238	2.8e-06	-0.39031	0.00131214
WC	CAVS	Triglycerides in IDL	0.162033	3.69e-06	0.300871	2.21e-09
WC	CAVS	Triglyceride levels in LDL	0.119785	0.000950254	0.31712	1.01e-10
WC	CAVS	Total cholesterol to total lipids ratio in large HDL	-0.267267	5.88e-21	-0.261682	0.000138641
WC	CAVS	Triglycerides in large HDL	-0.145016	7.82e-11	0.156297	0.00329414
WC	CAVS	Triglycerides to total lipids ratio in large HDL	0.178982	3.63e-11	0.323228	4.59e-08
WC	CAVS	Free cholesterol to total lipids ratio in large LDL	-0.224161	2.99e-11	-0.220867	0.015265
WC	CAVS	Total cholesterol to total lipids ratio in medium HDL	-0.228933	2.43e-15	-0.339637	2.68e-08
WC	CAVS	Cholesteryl esters to total lipids ratio in medium HDL	-0.201256	1.03e-11	-0.316446	3e-09
WC	CAVS	Phospholipids to total lipids ratio in medium HDL	0.134702	3.99e-07	0.35919	1e-05
WC	CAVS	Triglycerides in medium HDL	0.195674	4.21e-14	0.226729	0.0044095
WC	CAVS	Triglycerides in medium LDL	0.100184	0.00501167	0.338767	7.56e-11
WC	CAVS	Monounsaturated fatty acids (16:1, 18:1) levels	0.150973	5.11e-06	0.258583	0.00676775
WC	CAVS	Total cholesterol in medium VLDL	0.206831	1.75e-09	0.185895	0.0276953
WC	CAVS	Total cholesterol to total lipids ratio in medium VLDL	-0.109795	6.17e-06	0.401538	0.000107821
WC	CAVS	Cholesterol esters in medium VLDL	0.185389	2.09e-07	0.236906	0.00508714
WC	CAVS	Cholesteryl esters to total lipids ratio in medium VLDL	-0.135946	1.1e-08	0.335795	0.000820803
WC	CAVS	Free cholesterol to total lipids ratio in medium VLDL	0.0946283	0.000206913	0.259222	0.0110516
WC	CAVS	Triglycerides to total lipids ratio in medium VLDL	0.131862	2.17e-08	-0.418925	8.14e-06
WC	CAVS	Phosphatidylcholine and other choline levels	-0.0848586	0.00290782	0.356107	5.33e-11
WC	CAVS	Pyruvate levels	0.104281	3.97e-06	0.329318	0.0332311
WC	CAVS	Remnant cholesterol (non-HDL, non-LDL -cholesterol)	0.116294	0.0104231	0.3883	4.76e-17
WC	CAVS	Serum total triglyceride levels	0.230574	1.11e-12	0.172999	0.0420079
WC	CAVS	Triglycerides in small HDL	0.27277	5.75e-22	0.171128	0.0333704
WC	CAVS	Triglycerides in small LDL	0.138799	0.000142246	0.307969	3.26e-05
WC	CAVS	Total cholesterol in small VLDL	0.174909	5.23e-06	0.368595	1.09e-11
WC	CAVS	Total cholesterol to total lipids ratio in small VLDL	-0.125768	1.76e-06	0.270927	0.0058244
WC	CAVS	Cholesterol esters in small VLDL	0.153767	7.84e-05	0.42221	1.35e-18
WC	CAVS	Cholesteryl esters to total lipids ratio in small VLDL	-0.108652	6.06e-05	0.23489	0.0117952
WC	CAVS	Free cholesterol in small VLDL	0.196666	3.03e-08	0.312761	4.41e-10
WC	CAVS	Total lipids in small VLDL	0.221516	5.07e-10	0.236274	0.00238732
WC	CAVS	Concentration of small VLDL particles	0.226934	8.25e-11	0.203945	0.00937507
WC	CAVS	Phospholipids in small VLDL	0.217383	2.23e-10	0.204523	0.00616963
WC	CAVS	Total cholines levels	-0.0887085	0.00260891	0.342831	3.71e-10
WC	CAVS	Total phosphoglycerides levels	-0.0787657	0.00648139	0.355236	3.26e-10
WC	CAVS	Total cholesterol levels in VLDL	0.192588	4.58e-07	0.278374	0.00023375
WC	CAVS	Total cholesterol to total lipids ratio in very large VLDL	-0.119185	2.42e-08	0.420366	0.0417108
WC	CAVS	Triglycerides to total lipids ratio in very large VLDL	0.110614	1.71e-06	-0.554964	0.0026544
WC	CAVS	Total cholesterol in very small VLDL	0.0860031	0.0293113	0.404312	6.92e-17
WC	CAVS	Cholesterol esters in very small VLDL	0.0962384	0.0120971	0.434245	1.06e-17
WC	CAVS	Total lipids in very small VLDL	0.122974	0.00349782	0.393194	7.05e-22
WC	CAVS	Concentration of very small VLDL particles	0.135659	0.00113617	0.394369	7.15e-23
WC	CAVS	Triglycerides in very small VLDL	0.22095	1.42e-10	0.238887	0.000370134

## Sheet: TG result
Exposure	Outcome	Mediation	β1	pval1	β2	pval2
TG	CAVS	Apolipoprotein B levels	0.578462	5.49e-14	0.337865	4.42e-13
TG	CAVS	Ratio of apolipoprotein B to apolipoprotein A1 levels	0.66404	1.24e-12	0.272179	1.34e-09
TG	CAVS	Ratio of diacylglycerol to triglycerides	0.327129	3.04e-10	0.548684	8.55e-05
TG	CAVS	Estimated description of fatty acid chain length not actual carbon number	0.418838	1e-15	-0.318365	0.0495732
TG	CAVS	Triglyceride levels in HDL	0.785647	4.13e-07	0.232973	0.00339096
TG	CAVS	Concentration of IDL particles	0.249481	0.0402834	0.345257	3.56e-17
TG	CAVS	Phospholipids to total lipids ratio in IDL	-0.497374	1.69e-06	-0.39031	0.00131214
TG	CAVS	Triglycerides in IDL	0.763742	1.8e-05	0.300871	2.21e-09
TG	CAVS	Linoleic acid (18:2) levels	0.45877	3.06e-06	0.267048	6.33e-07
TG	CAVS	Triglyceride levels in LDL	0.641133	0.000246297	0.31712	1.01e-10
TG	CAVS	Total cholesterol to total lipids ratio in large HDL	-0.548872	5.4e-06	-0.261682	0.000138641
TG	CAVS	Cholesteryl esters to total lipids ratio in large HDL	-0.423828	7.56e-05	-0.313981	6.66e-05
TG	CAVS	Triglycerides to total lipids ratio in large HDL	0.653092	1.4e-08	0.323228	4.59e-08
TG	CAVS	Total cholesterol to total lipids ratio in large LDL	-0.324848	0.00253309	0.212993	0.00451224
TG	CAVS	Free cholesterol to total lipids ratio in large LDL	-0.843663	4.58e-49	-0.220867	0.015265
TG	CAVS	Concentration of large LDL particles	0.219852	0.0277119	0.313902	1.28e-12
TG	CAVS	Triglycerides in large LDL	0.612504	0.00125146	0.359368	9.81e-14
TG	CAVS	Total cholesterol to total lipids ratio in medium HDL	-0.656739	3.4e-08	-0.339637	2.68e-08
TG	CAVS	Cholesteryl esters to total lipids ratio in medium HDL	-0.67156	1.73e-06	-0.316446	3e-09
TG	CAVS	Phospholipids to total lipids ratio in medium HDL	0.287934	0.0275109	0.35919	1e-05
TG	CAVS	Triglycerides in medium HDL	0.829361	1.85e-17	0.226729	0.0044095
TG	CAVS	Total cholesterol to total lipids ratio in medium LDL	-0.289089	0.000398849	0.277436	0.000497728
TG	CAVS	Free cholesterol to total lipids ratio in medium LDL	-0.350458	6.38e-05	-0.374684	6.4e-09
TG	CAVS	Phospholipids in medium LDL	0.342977	6.82e-06	0.333937	2.38e-12
TG	CAVS	Triglycerides in medium LDL	0.555981	0.00140871	0.338767	7.56e-11
TG	CAVS	Monounsaturated fatty acids (16:1, 18:1) levels	0.806253	7.32e-25	0.258583	0.00676775
TG	CAVS	Total cholesterol in medium VLDL	0.889693	1.4e-47	0.185895	0.0276953
TG	CAVS	Cholesterol esters in medium VLDL	0.820536	9.92e-31	0.236906	0.00508714
TG	CAVS	Cholesteryl esters to total lipids ratio in medium VLDL	-0.413299	0.00184028	0.335795	0.000820803
TG	CAVS	Free cholesterol to total lipids ratio in medium VLDL	0.716409	1.37e-08	0.259222	0.0110516
TG	CAVS	Pyruvate levels	0.14911	0.000585191	0.329318	0.0332311
TG	CAVS	Remnant cholesterol (non-HDL, non-LDL -cholesterol)	0.561566	2.89e-10	0.3883	4.76e-17
TG	CAVS	Serum total triglyceride levels	0.964727	9.51e-70	0.172999	0.0420079
TG	CAVS	Saturated fatty acids	0.581126	6.66e-09	0.400034	1.04e-05
TG	CAVS	Total cholesterol to total lipids ratio in small HDL	-0.341447	3.16e-10	0.350206	5.7e-05
TG	CAVS	Cholesteryl esters to total lipids ratio in small HDL	-0.327186	3.17e-09	0.341002	5.87e-05
TG	CAVS	Triglycerides in small HDL	0.909113	5.63e-22	0.171128	0.0333704
TG	CAVS	Total cholesterol to total lipids ratio in small LDL	-0.299099	4.23e-05	0.306008	7.43e-05
TG	CAVS	Cholesteryl esters to total lipids ratio in small LDL	-0.154851	0.0409873	0.354488	8.03e-07
TG	CAVS	Free cholesterol to total lipids ratio in small LDL	-0.269522	0.00264201	-0.373617	4.45e-09
TG	CAVS	Phospholipids in small LDL	0.312012	5.47e-05	0.331418	8.2e-11
TG	CAVS	Triglycerides in small LDL	0.743003	2.05e-09	0.307969	3.26e-05
TG	CAVS	Total cholesterol in small VLDL	0.738117	1.71e-18	0.368595	1.09e-11
TG	CAVS	Total cholesterol to total lipids ratio in small VLDL	-0.551013	1.69e-10	0.270927	0.0058244
TG	CAVS	Cholesterol esters in small VLDL	0.601009	6.18e-12	0.42221	1.35e-18
TG	CAVS	Cholesteryl esters to total lipids ratio in small VLDL	-0.575763	1.28e-13	0.23489	0.0117952
TG	CAVS	Free cholesterol in small VLDL	0.921824	1.07e-32	0.312761	4.41e-10
TG	CAVS	Total lipids in small VLDL	0.943032	8.85e-43	0.236274	0.00238732
TG	CAVS	Concentration of small VLDL particles	0.95983	1.4e-47	0.203945	0.00937507
TG	CAVS	Phospholipids in small VLDL	0.959248	1.47e-36	0.204523	0.00616963
TG	CAVS	Total fatty acids	0.653524	5.83e-11	0.366522	6.63e-06
TG	CAVS	Total cholesterol levels in VLDL	0.792593	1.9e-25	0.278374	0.00023375
TG	CAVS	Total cholesterol to total lipids ratio in very large VLDL	-0.285796	0.00583421	0.420366	0.0417108
TG	CAVS	Free cholesterol to total lipids ratio in very large VLDL	-0.190527	0.00890631	0.586885	7.67e-06
TG	CAVS	Triglycerides to total lipids ratio in very large VLDL	0.237839	0.0223606	-0.554964	0.0026544
TG	CAVS	Total cholesterol in very small VLDL	0.32528	0.00893825	0.404312	6.92e-17
TG	CAVS	Cholesterol esters in very small VLDL	0.286157	0.0153449	0.434245	1.06e-17
TG	CAVS	Free cholesterol in very small VLDL	0.376446	0.0052347	0.412581	3.48e-23
TG	CAVS	Total lipids in very small VLDL	0.546941	1.55e-05	0.393194	7.05e-22
TG	CAVS	Concentration of very small VLDL particles	0.607401	1.36e-06	0.394369	7.15e-23
TG	CAVS	Triglycerides in very small VLDL	0.991804	1.36e-22	0.238887	0.000370134
TG	CAVS	Triglycerides to total lipids ratio in chylomicrons and extremely large VLDL	-0.395691	0.00186793	-0.440252	1.51e-06

## Sheet: HDL-C result
Exposure	Outcome	Mediation	β1	pval1	β2	pval2
HDL-C	CAVS	Alanine levels	0.075761	0.000253171	0.325402	3.94e-08
HDL-C	CAVS	Apolipoprotein B levels	-0.23942	5.53e-08	0.337865	4.42e-13
HDL-C	CAVS	Docosahexaenoic acid (22:6) levels	0.189253	5.91e-06	0.425697	2.47e-14
HDL-C	CAVS	Ratio of 22:6 docosahexaenoic acid to total fatty acids	0.239448	6.64e-13	0.3607	3.87e-10
HDL-C	CAVS	Esterified cholesterol levels	0.228874	1.01e-07	0.343046	2.56e-15
HDL-C	CAVS	Estimated description of fatty acid chain length not actual carbon number	-0.165182	7.58e-07	-0.318365	0.0495732
HDL-C	CAVS	Ratio of omega-3 fatty acids to total fatty acids	0.238419	4.07e-08	0.245942	3e-06
HDL-C	CAVS	Free cholesterol levels	0.241397	1.97e-08	0.352382	1.1e-17
HDL-C	CAVS	Free cholesterol in IDL	0.167054	0.000288947	0.370601	2.26e-11
HDL-C	CAVS	Phospholipids to total lipids ratio in IDL	0.14945	9.83e-06	-0.39031	0.00131214
HDL-C	CAVS	Triglycerides in IDL	-0.168935	0.0015525	0.300871	2.21e-09
HDL-C	CAVS	Triglycerides to total lipids ratio in large HDL	-0.356648	2.68e-22	0.323228	4.59e-08
HDL-C	CAVS	Free cholesterol in large LDL	0.125773	0.00781142	0.342998	1.6e-09
HDL-C	CAVS	Total cholesterol to total lipids ratio in large VLDL	0.104788	0.000416488	0.381246	0.00029751
HDL-C	CAVS	Phospholipids to total lipids ratio in large VLDL	0.169556	3.86e-08	0.496485	1.79e-13
HDL-C	CAVS	Total cholesterol to total lipids ratio in medium HDL	0.454529	5.59e-38	-0.339637	2.68e-08
HDL-C	CAVS	Cholesteryl esters to total lipids ratio in medium HDL	0.361431	9.67e-19	-0.316446	3e-09
HDL-C	CAVS	Phospholipids to total lipids ratio in medium HDL	-0.170349	2.79e-07	0.35919	1e-05
HDL-C	CAVS	Triglycerides in medium HDL	-0.279514	4.22e-11	0.226729	0.0044095
HDL-C	CAVS	Free cholesterol to total lipids ratio in medium LDL	0.133058	0.00161872	-0.374684	6.4e-09
HDL-C	CAVS	Monounsaturated fatty acids (16:1, 18:1) levels	-0.197472	1.12e-06	0.258583	0.00676775
HDL-C	CAVS	Free cholesterol to total lipids ratio in medium VLDL	-0.119918	0.00501431	0.259222	0.0110516
HDL-C	CAVS	Phosphatidylcholine and other choline levels	0.409943	9.34e-30	0.356107	5.33e-11
HDL-C	CAVS	Remnant cholesterol (non-HDL, non-LDL -cholesterol)	-0.201852	2.78e-06	0.3883	4.76e-17
HDL-C	CAVS	Serum total cholesterol levels	0.235192	5.52e-08	0.337604	1.69e-14
HDL-C	CAVS	Total cholesterol levels in small HDL	0.116438	8.36e-05	0.481144	0.00137169
HDL-C	CAVS	Total cholesterol to total lipids ratio in small HDL	0.142591	0.000242583	0.350206	5.7e-05
HDL-C	CAVS	Cholesterol esters in small HDL	0.0930424	0.00370288	0.39041	0.00200559
HDL-C	CAVS	Cholesteryl esters to total lipids ratio in small HDL	0.0987144	0.0137668	0.341002	5.87e-05
HDL-C	CAVS	Triglycerides in small HDL	-0.537228	1.76e-43	0.171128	0.0333704
HDL-C	CAVS	Free cholesterol to total lipids ratio in small LDL	0.0980835	0.0212719	-0.373617	4.45e-09
HDL-C	CAVS	Triglycerides in small LDL	-0.146478	0.00181534	0.307969	3.26e-05
HDL-C	CAVS	Sphingomyelins levels	0.393316	6.88e-35	0.377651	4.22e-13
HDL-C	CAVS	Total cholesterol to total lipids ratio in small VLDL	0.422426	7.17e-34	0.270927	0.0058244
HDL-C	CAVS	Cholesteryl esters to total lipids ratio in small VLDL	0.379606	4.11e-26	0.23489	0.0117952
HDL-C	CAVS	Total cholines levels	0.426523	6.18e-34	0.342831	3.71e-10
HDL-C	CAVS	Total phosphoglycerides levels	0.370221	4.13e-24	0.355236	3.26e-10
HDL-C	CAVS	Triglycerides in very large HDL	0.25448	6.94e-09	0.198523	0.0451451
HDL-C	CAVS	Total cholesterol to total lipids ratio in very large VLDL	0.217672	1.23e-17	0.420366	0.0417108
HDL-C	CAVS	Free cholesterol to total lipids ratio in very large VLDL	0.294761	6.92e-44	0.586885	7.67e-06
HDL-C	CAVS	Phospholipids to total lipids ratio in very large VLDL	0.199742	1.05e-16	0.532846	2.32e-06
HDL-C	CAVS	Triglycerides to total lipids ratio in very large VLDL	-0.264582	9.47e-23	-0.554964	0.0026544
HDL-C	CAVS	Total lipids in very small VLDL	-0.159406	0.000465994	0.393194	7.05e-22
HDL-C	CAVS	Concentration of very small VLDL particles	-0.18907	3.47e-05	0.394369	7.15e-23
HDL-C	CAVS	Triglycerides in very small VLDL	-0.443226	2.98e-22	0.238887	0.000370134
HDL-C	CAVS	Total cholesterol to total lipids ratio in chylomicrons and extremely large VLDL	0.0689015	0.0469084	0.523182	0.000135513
