# Supplementary material for: Causal Inference of Metabolic Syndrome on Calcific Aortic Valve Stenosis: Linkage Disequilibrium Score Regression and Two-Sample, Two-Step Mendelian Randomization Analysis
Source: Research Square preprint supplement (doi:10.21203/rs.3.rs-7141693/v1), 2025-08-22
Supplement: Supplementary file 3 [file af5c5a5f14e4e0eb8518de08.xlsx]

## Sheet: STEP2 sensitivity
Mediation	Outcome	Q.MRegger.	Q_df.MRegger.	Q_pval.MRegger.	Q.IVW.	Q_df.IVW.	Q_pval.IVW.	egger_intercept	egger_intercept_p
Alanine levels	CAVS	78.6703	59	0.0444415	76.5284	58	0.0520168	-0.00622656	0.207713
Apolipoprotein B levels	CAVS	303.976	108	1.52e-20	297.937	107	6.45e-20	0.00572314	0.143763
Ratio of apolipoprotein B to apolipoprotein A1 levels	CAVS	289.962	113	1.65e-17	285.33	112	4.3e-17	-0.0050271	0.180243
Ratio of diacylglycerol to triglycerides	CAVS	33.934	15	0.00347882	30.0276	14	0.00756534	-0.0244943	0.198581
Docosahexaenoic acid (22:6) levels	CAVS	142.642	58	4.39e-09	139.819	57	6.54e-09	0.00546067	0.287884
Ratio of 22:6 docosahexaenoic acid to total fatty acids	CAVS	56.2046	34	0.00967058	54.039	33	0.0118782	-0.00547152	0.258414
Esterified cholesterol levels	CAVS	258.766	109	3.36e-14	255.18	108	6.24e-14	0.00443393	0.220656
Estimated description of fatty acid chain length not actual carbon number	CAVS	501.923	32	8.18e-86	494.307	31	7.28e-85	0.0119643	0.494618
Omega-3 fatty acids levels	CAVS	136.61	60	6.62e-08	135.52	59	5.9e-08	0.00320422	0.493678
Ratio of omega-3 fatty acids to total fatty acids	CAVS	60.435	29	0.000545129	55.5197	28	0.00147137	-0.00782116	0.126615
Free cholesterol levels	CAVS	242.693	107	1.53e-12	234.853	106	9.39e-12	0.00672597	0.0626996
Total cholesterol in HDL3	CAVS	256.307	63	3.79e-25	256.13	62	1.98e-25	0.00150257	0.836508
Triglyceride levels in HDL	CAVS	519.93	74	3.38e-68	519.925	73	1.26e-68	-0.000215186	0.978587
Total Cholesterol in IDL	CAVS	317.787	113	2.3e-21	308.038	112	3.26e-20	0.00680865	0.0623371
Cholesterol esters in IDL	CAVS	298.333	113	1.2e-18	291.966	112	5.44e-18	0.00567659	0.120904
Free cholesterol in IDL	CAVS	476.263	108	1.07e-47	464.474	107	4.95e-46	0.00773895	0.102295
Total lipids in IDL	CAVS	544.461	111	2.19e-58	535.633	110	3.36e-57	0.00675858	0.18092
Concentration of IDL particles	CAVS	284.069	116	4.11e-16	277.721	115	1.75e-15	0.00568741	0.107691
Phospholipids in IDL	CAVS	429.092	111	6.1e-39	418.186	110	1.8e-37	0.00739166	0.0931499
Phospholipids to total lipids ratio in IDL	CAVS	435.346	57	1.14e-59	434.198	56	6.69e-60	0.00453251	0.701838
Triglycerides in IDL	CAVS	267.525	105	3.75e-16	267.39	104	2.42e-16	-0.000958393	0.819358
Linoleic acid (18:2) levels	CAVS	281.278	99	2.23e-19	275.577	98	8.53e-19	0.00668705	0.157646
Total cholesterol levels in LDL	CAVS	421.926	104	6.97e-40	409.84	103	3.35e-38	0.00770589	0.0843419
Triglyceride levels in LDL	CAVS	266.691	98	1.53e-17	265.036	97	1.56e-17	0.00331888	0.438335
Total cholesterol to total lipids ratio in large HDL	CAVS	265.253	77	1.64e-22	265.235	76	8.76e-23	0.000400759	0.944207
Cholesteryl esters to total lipids ratio in large HDL	CAVS	261.905	67	7.57e-25	261.81	66	3.9e-25	0.000968619	0.878052
Triglycerides in large HDL	CAVS	144.338	61	1.04e-08	143.48	60	8.57e-09	0.00299072	0.551572
Triglycerides to total lipids ratio in large HDL	CAVS	165.007	69	7.74e-10	160.119	68	2.13e-09	-0.00748649	0.154212
Total cholesterol to total lipids ratio in large LDL	CAVS	605.095	85	1.94e-79	600.045	84	6.37e-79	0.0056524	0.402844
Free cholesterol in large LDL	CAVS	489.296	105	6.53e-51	479.492	104	1.44e-49	0.00695367	0.147774
Free cholesterol to total lipids ratio in large LDL	CAVS	675.168	91	5.17e-90	673.496	90	3.89e-90	0.00369575	0.637505
Concentration of large LDL particles	CAVS	292.26	107	4.06e-19	284.072	106	3.37e-18	0.00641992	0.0833677
Phospholipids in large LDL	CAVS	265.935	105	6.13e-16	259.42	104	2.83e-15	0.00574966	0.109078
Phospholipids to total lipids ratio in large LDL	CAVS	511.52	102	8.46e-56	495.612	101	2.25e-53	-0.00946071	0.0747598
Triglycerides in large LDL	CAVS	232.85	98	5.5e-13	232.114	97	4.38e-13	0.00236096	0.580353
Total cholesterol to total lipids ratio in large VLDL	CAVS	148.847	34	2.56e-16	147.856	33	1.76e-16	0.00485645	0.641154
Phospholipids to total lipids ratio in large VLDL	CAVS	117.94	47	5.03e-08	115.018	46	7.76e-08	0.00646321	0.285298
Triglycerides to total lipids ratio in large VLDL	CAVS	131.222	46	3.99e-10	131.221	45	2.3e-10	-0.000105895	0.988147
Total cholesterol to total lipids ratio in medium HDL	CAVS	203.025	69	3.98e-15	200.841	68	4.78e-15	-0.00462424	0.392904
Cholesteryl esters to total lipids ratio in medium HDL	CAVS	210.311	78	4.3e-14	210.204	77	2.67e-14	-0.000937234	0.843113
Phospholipids to total lipids ratio in medium HDL	CAVS	135.527	42	8.97e-12	135.402	41	5.08e-12	0.00154778	0.846383
Triglycerides in medium HDL	CAVS	568.4	92	9.62e-70	568.197	91	4.17e-70	-0.0011766	0.85726
Total cholesterol to total lipids ratio in medium LDL	CAVS	629.173	82	2.71e-85	629.137	81	9.85e-86	0.00048031	0.945543
Cholesteryl esters to total lipids ratio in medium LDL	CAVS	458.81	80	1.6e-54	449.166	79	3.64e-53	0.00792739	0.196577
Free cholesterol in medium LDL	CAVS	270.632	98	4.28e-18	262.031	97	4.11e-17	0.00682619	0.0775021
Free cholesterol to total lipids ratio in medium LDL	CAVS	475.903	101	5.8e-50	464.739	100	2.21e-48	-0.00819481	0.124328
Phospholipids in medium LDL	CAVS	302.739	106	7.89e-21	295.218	105	5.5e-20	0.00657172	0.104911
Phospholipids to total lipids ratio in medium LDL	CAVS	555.989	95	2.63e-66	543.291	94	2.14e-64	-0.00864962	0.141632
Triglycerides in medium LDL	CAVS	237.67	85	2.24e-16	229.501	84	1.9e-15	0.00815402	0.0874543
Monounsaturated fatty acids (16:1, 18:1) levels	CAVS	630.672	80	1.78e-86	625.787	79	5.36e-86	0.00697014	0.434612
Total cholesterol in medium VLDL	CAVS	686.889	93	2.39e-91	685.711	92	1.45e-91	0.00280759	0.691885
Total cholesterol to total lipids ratio in medium VLDL	CAVS	473.639	62	1.04e-64	468.734	61	3.18e-64	-0.00785729	0.4274
Cholesterol esters in medium VLDL	CAVS	625.032	91	1.3e-80	621.81	90	1.96e-80	0.00504762	0.496454
Cholesteryl esters to total lipids ratio in medium VLDL	CAVS	531.855	72	2.65e-71	523.577	71	3.52e-70	-0.00941734	0.292965
Free cholesterol to total lipids ratio in medium VLDL	CAVS	479.02	60	1.24e-66	477.421	59	8.71e-67	-0.00385111	0.658254
Phospholipids to total lipids ratio in medium VLDL	CAVS	592.226	53	3.67e-92	589.749	52	3.36e-92	-0.00645435	0.642208
Triglycerides to total lipids ratio in medium VLDL	CAVS	478.517	70	3.71e-62	476.179	69	3.82e-62	0.00483477	0.562348
Phosphatidylcholine and other choline levels	CAVS	229.404	85	3.27e-15	219.382	84	4.83e-14	0.00970253	0.0534425
Pyruvate levels	CAVS	25.8322	12	0.0113361	25.7273	11	0.00712401	0.00351119	0.836171
Remnant cholesterol (non-HDL, non-LDL -cholesterol)	CAVS	258.892	102	1.3e-15	255.265	101	2.47e-15	0.00485362	0.233713
Serum total cholesterol levels	CAVS	294.092	114	7.41e-18	292.623	113	7.22e-18	0.00279703	0.45283
Serum total triglyceride levels	CAVS	677.908	90	5.7e-91	676.238	89	4.26e-91	0.00343624	0.640343
Saturated fatty acids	CAVS	490.961	79	9.24e-61	474.044	78	4.59e-58	0.012902	0.0992454
Total cholesterol levels in small HDL	CAVS	472.514	48	4.12e-71	471.681	47	1.88e-71	-0.00327838	0.774474
Total cholesterol to total lipids ratio in small HDL	CAVS	592.333	84	1.78e-77	592.013	83	7.6e-78	-0.00147403	0.832852
Cholesterol esters in small HDL	CAVS	507.223	54	6.42e-75	505.492	53	4.49e-75	-0.00462146	0.671873
Cholesteryl esters to total lipids ratio in small HDL	CAVS	599.866	85	1.85e-78	599.12	84	9.5e-79	-0.00219173	0.747224
Phospholipids to total lipids ratio in small HDL	CAVS	520.07	82	6.76e-65	517.543	81	7.75e-65	-0.00429688	0.531245
Triglycerides in small HDL	CAVS	550.993	84	8.78e-70	547.548	83	1.47e-69	-0.00505712	0.47194
Total cholesterol to total lipids ratio in small LDL	CAVS	620.648	82	1.12e-83	620.575	81	4.15e-84	0.00067613	0.922562
Cholesterol esters in small LDL	CAVS	504.109	101	7.41e-55	485.527	100	5.71e-52	0.00967074	0.0532162
Cholesteryl esters to total lipids ratio in small LDL	CAVS	574.16	87	7.83e-73	566.152	86	9.19e-72	0.00695549	0.273133
Free cholesterol to total lipids ratio in small LDL	CAVS	477.709	100	1.29e-50	466.831	99	4.42e-49	-0.00808905	0.131998
Phospholipids in small LDL	CAVS	329.473	106	9.67e-25	317.604	105	3.15e-23	0.00838604	0.0502205
Phospholipids to total lipids ratio in small LDL	CAVS	514.519	95	7.35e-59	509.066	94	2.93e-58	-0.00552457	0.318227
Triglycerides in small LDL	CAVS	561.238	96	7.19e-67	560.549	95	3.93e-67	-0.00222509	0.733335
Sphingomyelins levels	CAVS	205.242	88	2.32e-11	203.715	87	2.34e-11	0.00374283	0.421516
Total cholesterol in small VLDL	CAVS	316.712	104	2.42e-23	314.62	103	2.8e-23	0.00397426	0.409813
Total cholesterol to total lipids ratio in small VLDL	CAVS	666.945	78	2.43e-94	664.026	77	3e-94	-0.00470334	0.562389
Cholesterol esters in small VLDL	CAVS	245.627	108	1.01e-12	243.445	107	1.23e-12	0.0038923	0.329634
Cholesteryl esters to total lipids ratio in small VLDL	CAVS	589.773	76	1.69e-80	589.708	75	6.18e-81	-0.000694833	0.927901
Free cholesterol in small VLDL	CAVS	283.256	103	9.51e-19	283.12	102	5.91e-19	-0.00094484	0.82564
Free cholesterol to total lipids ratio in small VLDL	CAVS	537.532	60	6.78e-78	537.315	59	2.46e-78	-0.00151847	0.87788
Total lipids in small VLDL	CAVS	662.981	100	6.66e-84	662.536	99	3.1e-84	-0.00172187	0.796907
Concentration of small VLDL particles	CAVS	675.366	99	1.28e-86	674.563	98	6.86e-87	-0.00228151	0.733504
Phospholipids in small VLDL	CAVS	655.801	103	2.38e-81	651.134	102	6.75e-81	-0.00542849	0.394539
Total cholines levels	CAVS	240.813	88	3.84e-16	234.521	87	1.75e-15	0.00739725	0.130183
Total fatty acids	CAVS	514.894	86	2.35e-62	500.93	85	3.28e-60	0.0109669	0.127441
Total phosphoglycerides levels	CAVS	219.862	82	1.53e-14	211.501	81	1.33e-13	0.00896428	0.0772756
Total cholesterol levels in VLDL	CAVS	566.698	100	2.54e-66	566.055	99	1.38e-66	0.00220239	0.738061
Triglycerides in very large HDL	CAVS	592.547	62	1.27e-87	569.567	61	1.24e-83	0.0161702	0.121871
Total cholesterol to total lipids ratio in very large VLDL	CAVS	401.127	29	4.4e-67	394.668	28	2.35e-66	-0.0165499	0.504003
Free cholesterol to total lipids ratio in very large VLDL	CAVS	174.144	39	5.4e-19	174.033	38	2.6e-19	0.00204094	0.877516
Phospholipids to total lipids ratio in very large VLDL	CAVS	160.854	41	4.09e-16	160.668	40	2.16e-16	0.00209249	0.830538
Triglycerides to total lipids ratio in very large VLDL	CAVS	399.024	32	5.89e-65	396.122	31	6.24e-65	0.0100531	0.637026
Total cholesterol in very small VLDL	CAVS	216.569	87	4.91e-13	214.894	86	5.13e-13	0.00367769	0.415249
Cholesterol esters in very small VLDL	CAVS	197.224	80	6.94e-12	191.403	79	2.56e-11	0.00689293	0.125146
Free cholesterol in very small VLDL	CAVS	199.881	100	1.22e-08	198.11	99	1.34e-08	0.00332943	0.349197
Total lipids in very small VLDL	CAVS	238.649	112	3.61e-11	235.674	111	5.5e-11	0.00406251	0.239072
Concentration of very small VLDL particles	CAVS	238.34	116	1.8e-10	237.898	115	1.39e-10	0.00153652	0.645055
Triglycerides in very small VLDL	CAVS	601.426	108	1.57e-69	594.361	107	1.22e-68	-0.00644961	0.261931
Total cholesterol to total lipids ratio in chylomicrons and extremely large VLDL	CAVS	371.656	41	7.22e-55	371.331	40	2.72e-55	0.00260367	0.852386
Cholesteryl esters to total lipids ratio in chylomicrons and extremely large VLDL	CAVS	365.506	37	1.21e-55	361.407	36	2.41e-55	-0.0105568	0.526829
Triglycerides to total lipids ratio in chylomicrons and extremely large VLDL	CAVS	138.576	35	2.9e-14	135.844	34	4.05e-14	0.00825068	0.414055
