# Supplementary material for: Causal Inference of Metabolic Syndrome on Calcific Aortic Valve Stenosis: Linkage Disequilibrium Score Regression and Two-Sample, Two-Step Mendelian Randomization Analysis
Source: Research Square preprint supplement (doi:10.21203/rs.3.rs-7141693/v1), 2025-08-22
Supplement: Supplementary file 4 [file d71ba60a4b6d2b2cdcdc71c7.xlsx]

## Sheet: 所有中介效应完整 - 副本 (3)
Mediation.name	Exposure	Outcome	beta1	beta2	β'/β
Apolipoprotein B levels	Mets	CAVS	0.384797	0.337865	0.22
	TG	CAVS	0.578462	0.337865	0.56
	WC	CAVS	0.111499	0.337865	0.09
Triglycerides in IDL	Mets	CAVS	0.437534	0.300871	0.22
	TG	CAVS	0.763742	0.300871	0.66
	WC	CAVS	0.162033	0.300871	0.12
Triglyceride levels in LDL	Mets	CAVS	0.321503	0.31712	0.17
	TG	CAVS	0.641133	0.31712	0.58
	WC	CAVS	0.119785	0.31712	0.09
Triglycerides in medium HDL	Mets	CAVS	0.516801	0.226729	0.2
	TG	CAVS	0.829361	0.226729	0.54
	WC	CAVS	0.195674	0.226729	0.11
Triglycerides in medium LDL	Mets	CAVS	0.260973	0.338767	0.15
	TG	CAVS	0.555981	0.338767	0.54
	WC	CAVS	0.100184	0.338767	0.08
Monounsaturated fatty acids (16:1, 18:1) levels	Mets	CAVS	0.453593	0.258583	0.2
	TG	CAVS	0.806253	0.258583	0.6
	WC	CAVS	0.150973	0.258583	0.09
Total cholesterol in medium VLDL	Mets	CAVS	0.628938	0.185895	0.2
	TG	CAVS	0.889693	0.185895	0.47
	WC	CAVS	0.206831	0.185895	0.09
Cholesterol esters in medium VLDL	Mets	CAVS	0.56059	0.236906	0.22
	TG	CAVS	0.820536	0.236906	0.56
	WC	CAVS	0.185389	0.236906	0.11
Free cholesterol to total lipids ratio in medium VLDL	Mets	CAVS	0.341539	0.259222	0.15
	TG	CAVS	0.716409	0.259222	0.53
	WC	CAVS	0.0946283	0.259222	0.06
Remnant cholesterol (non-HDL, non-LDL -cholesterol)	Mets	CAVS	0.359466	0.3883	0.23
	TG	CAVS	0.561566	0.3883	0.62
	WC	CAVS	0.116294	0.3883	0.11
Serum total triglyceride levels	Mets	CAVS	0.689492	0.172999	0.2
	TG	CAVS	0.964727	0.172999	0.48
	WC	CAVS	0.230574	0.172999	0.1
Triglycerides in small LDL	Mets	CAVS	0.411288	0.307969	0.21
	TG	CAVS	0.743003	0.307969	0.65
	WC	CAVS	0.138799	0.307969	0.1
Total cholesterol in small VLDL	Mets	CAVS	0.503552	0.368595	0.31
	TG	CAVS	0.738117	0.368595	0.78
	WC	CAVS	0.174909	0.368595	0.16
Cholesterol esters in small VLDL	Mets	CAVS	0.418613	0.42221	0.29
	TG	CAVS	0.601009	0.42221	0.73
	WC	CAVS	0.153767	0.42221	0.16
Total cholesterol levels in VLDL	Mets	CAVS	0.554807	0.278374	0.26
	TG	CAVS	0.792593	0.278374	0.63
	WC	CAVS	0.192588	0.278374	0.13
Total cholesterol in very small VLDL	Mets	CAVS	0.194807	0.404312	0.13
	TG	CAVS	0.32528	0.404312	0.38
	WC	CAVS	0.0860031	0.404312	0.08
Cholesterol esters in very small VLDL	Mets	CAVS	0.197463	0.434245	0.14
	TG	CAVS	0.286157	0.434245	0.36
	WC	CAVS	0.0962384	0.434245	0.1
Total lipids in very small VLDL	Mets	CAVS	0.334142	0.393194	0.22
	TG	CAVS	0.546941	0.393194	0.62
	WC	CAVS	0.122974	0.393194	0.12
Concentration of very small VLDL particles	Mets	CAVS	0.375062	0.394369	0.25
	TG	CAVS	0.607401	0.394369	0.69
	WC	CAVS	0.135659	0.394369	0.13
Phospholipids to total lipids ratio in IDL	Mets	CAVS	-0.326494	-0.39031	0.21
	TG	CAVS	-0.497374	-0.39031	0.56
	WC	CAVS	-0.128238	-0.39031	0.12
Total cholesterol to total lipids ratio in large HDL	Mets	CAVS	-0.671788	-0.261682	0.29
	TG	CAVS	-0.548872	-0.261682	0.41
	WC	CAVS	-0.267267	-0.261682	0.17
Free cholesterol to total lipids ratio in large LDL	Mets	CAVS	-0.617085	-0.220867	0.23
	TG	CAVS	-0.843663	-0.220867	0.53
	WC	CAVS	-0.224161	-0.220867	0.12
