# Supplementary material for: Causal Inference of Metabolic Syndrome on Calcific Aortic Valve Stenosis: Linkage Disequilibrium Score Regression and Two-Sample, Two-Step Mendelian Randomization Analysis
Source: Research Square preprint supplement (doi:10.21203/rs.3.rs-7141693/v1), 2025-08-22
Supplement: Supplementary file 5 [file e416932ea4e6f44e0c5fdaed.xlsx]

## Sheet: MetS step1sensitivity
Exposure	Q(Mregger)	Q_df(Mregger)	Q_pval(Mregger)	Q(IVW)	Q_df(IVW)	Q_pval(IVW)	egger_intercept	egger_intercept_p	Mediation
MetS	2764.93	526	1.34e-299	2810.56	527	2.78e-307	0.003348	0.00335884	Apolipoprotein A-I levels
MetS	2333.69	526	3.12e-225	2337.46	527	1.53e-225	-0.000970804	0.356997	Apolipoprotein B levels
MetS	2154.88	526	1.83e-195	2186.43	527	2.37e-200	-0.00281466	0.00571602	Ratio of apolipoprotein B to apolipoprotein A1 levels
MetS	1213.25	527	4.79e-56	1213.29	528	7.2e-56	-0.000148606	0.890016	Diacylglycerol levels
MetS	785.814	527	1.62e-12	785.873	528	1.96e-12	0.000170603	0.843695	Ratio of diacylglycerol to triglycerides
MetS	3856.82	526	0	3861.32	527	0	0.00104438	0.433824	Ratio of 22:6 docosahexaenoic acid to total fatty acids
MetS	829.305	527	7.3e-16	830.468	528	7.41e-16	-0.000761196	0.39025	Estimated description of fatty acid chain length not actual carbon number
MetS	6335.67	526	0	6346.92	527	0	0.00166385	0.33414	Ratio of omega-3 fatty acids to total fatty acids
MetS	1399.52	526	1.82e-80	1399.74	527	2.78e-80	-0.000237172	0.776733	Ratio of omega-6 fatty acids to total fatty acids
MetS	1097.32	526	1.9e-42	1098.79	527	1.88e-42	-0.000646379	0.401966	Glucose levels
MetS	692.463	524	1.01e-06	692.535	525	1.15e-06	0.000254908	0.81484	Glycerol levels
MetS	1273.02	526	9.47e-64	1274.41	527	9.77e-64	0.00061277	0.447522	Glycoprotein acetylation
MetS	2738.5	526	5.96e-295	2797.78	527	5.02e-305	0.00383056	0.00079423	Total cholesterol in HDL2
MetS	1837.76	526	1.09e-144	1855.53	527	3.51e-147	0.00210379	0.0245322	Total cholesterol in HDL3
MetS	2776.12	526	1.43e-301	2837.24	527	0	0.0038944	0.000717695	Total cholesterol levels in HDL
MetS	4110.73	526	0	4151.6	527	0	0.00318421	0.0226015	Mean diameter of HDL particles
MetS	3153.87	526	0	3164.19	527	0	-0.00161661	0.190053	Triglyceride levels in HDL
MetS	2233.25	526	2.02e-208	2246.05	527	3.1e-210	0.00176413	0.0831135	Cholesteryl esters to total lipids ratio in IDL
MetS	2024.66	526	2.87e-174	2042.7	527	6.97e-177	0.0020994	0.0308416	Free cholesterol to total lipids ratio in IDL
MetS	2185.91	526	1.42e-200	2185.91	527	2.89e-200	2.42e-05	0.981032	Concentration of IDL particles
MetS	2140.76	526	3.82e-193	2141.7	527	5.41e-193	0.000477778	0.631137	Phospholipids to total lipids ratio in IDL
MetS	3214.7	526	0	3228.8	527	0	-0.00188042	0.129343	Triglycerides in IDL
MetS	2445.35	526	3.63e-244	2470.3	527	4.3e-248	-0.00247699	0.0209132	Triglycerides to total lipids ratio in IDL
MetS	1131.04	526	2.46e-46	1132.51	527	2.43e-46	0.000609202	0.408481	Isoleucine levels
MetS	3339.65	526	0	3358.48	527	0	-0.00212231	0.0856309	Ratio of 18:2 linoleic acid to total fatty acids
MetS	2843.78	526	0	2849.03	527	0	-0.00114981	0.324724	Triglyceride levels in LDL
MetS	1044.14	526	1.57e-36	1052.54	527	2.7e-37	0.00144552	0.040217	Leucine levels
MetS	3095.93	526	0	3143.42	527	0	0.00343004	0.00467874	Total cholesterol in large HDL
MetS	2033.03	526	1.28e-175	2045.55	527	2.41e-177	0.00178298	0.0724778	Total cholesterol to total lipids ratio in large HDL
MetS	3099.81	526	0	3147.67	527	0	0.00344291	0.00454645	Cholesterol esters in large HDL
MetS	1793.52	526	7.49e-138	1801.06	527	9.61e-139	0.00138341	0.137803	Cholesteryl esters to total lipids ratio in large HDL
MetS	3048.71	526	0	3094.25	527	0	0.00335978	0.00525	Free cholesterol in large HDL
MetS	1888.11	526	1.49e-152	1901.11	527	2.57e-154	0.00180933	0.0575774	Free cholesterol to total lipids ratio in large HDL
MetS	3105.32	526	0	3154.03	527	0	0.00347464	0.00424127	Total lipids in large HDL
MetS	3120.06	526	0	3168.22	527	0	0.00345466	0.0045531	Concentration of large HDL particles
MetS	2956.75	526	0	3008.88	527	0	0.00359692	0.00243925	Phospholipids in large HDL
MetS	2922.08	526	0	2924.92	527	0	-0.000853118	0.474632	Phospholipids to total lipids ratio in large HDL
MetS	3661.45	526	0	3663.86	527	0	0.000773631	0.556552	Triglycerides in large HDL
MetS	2021	526	1.11e-173	2057.45	527	2.88e-179	-0.00305024	0.00217913	Triglycerides to total lipids ratio in large HDL
MetS	1980.42	526	3.58e-167	1983.52	527	2.22e-167	0.000879882	0.364346	Total cholesterol to total lipids ratio in large LDL
MetS	1877.82	526	6.13e-151	1878.04	527	1.07e-150	0.000232258	0.80587	Cholesterol esters in large LDL
MetS	1818.42	526	1.08e-141	1818.48	527	1.98e-141	0.000113027	0.902793	Cholesteryl esters to total lipids ratio in large LDL
MetS	2501.71	526	8.18e-254	2512.16	527	2.86e-255	0.00159783	0.138808	Free cholesterol to total lipids ratio in large LDL
MetS	1930.59	526	3.01e-159	1930.78	527	5.37e-159	0.000220612	0.817751	Total lipids in large LDL
MetS	1945.43	526	1.33e-161	1945.46	527	2.54e-161	8.65e-05	0.928166	Phospholipids to total lipids ratio in large LDL
MetS	2960.05	526	0	2964.59	527	0	-0.00106727	0.369159	Triglycerides in large LDL
MetS	2533.75	526	2.52e-259	2544.81	527	6.87e-261	-0.00165379	0.130195	Triglycerides to total lipids ratio in large LDL
MetS	2404.5	526	3.28e-237	2419.64	527	1.88e-239	-0.00195607	0.0693738	Total Cholesterol in large VLDL
MetS	2401.52	526	1.05e-236	2419.17	527	2.26e-239	-0.00211248	0.0497951	Cholesterol esters in large VLDL
MetS	1436.33	526	1.64e-85	1437.96	527	1.61e-85	-0.000662929	0.439653	Cholesteryl esters to total lipids ratio in large VLDL
MetS	2368.54	526	4.09e-231	2379.54	527	1.2e-232	-0.00166659	0.118696	Free cholesterol in large VLDL
MetS	1309.79	526	1.67e-68	1311.17	527	1.74e-68	-0.000635662	0.456941	Free cholesterol to total lipids ratio in large VLDL
MetS	2435.87	526	1.51e-242	2447.88	527	2.9e-244	-0.00174308	0.107868	Total lipids in large VLDL
MetS	2438.61	526	5.14e-243	2450.3	527	1.12e-244	-0.00171986	0.112834	Concentration of large VLDL particles
MetS	2430.4	526	1.29e-241	2441.42	527	3.67e-243	-0.00167008	0.123004	Phospholipids in large VLDL
MetS	2435.72	526	1.6e-242	2446.4	527	5.2e-244	-0.00164373	0.129453	Triglycerides in large VLDL
MetS	2394.58	526	1.59e-235	2439.7	527	7.23e-243	0.00335748	0.00173652	Total cholesterol levels in medium HDL
MetS	2304.74	526	2.31e-220	2339.98	527	5.74e-226	0.00293514	0.00474101	Total cholesterol to total lipids ratio in medium HDL
MetS	2393.55	526	2.37e-235	2440.11	527	6.15e-243	0.00341421	0.00146426	Cholesterol esters in medium HDL
MetS	2636.94	526	3.4e-277	2667.94	527	3.03e-282	0.0027611	0.0132021	Cholesteryl esters to total lipids ratio in medium HDL
MetS	2378.99	526	6.98e-233	2414.47	527	1.42e-238	0.00296574	0.00528272	Free cholesterol in medium HDL
MetS	1725.18	526	2e-127	1746.16	527	2.4e-130	0.00227231	0.0117113	Free cholesterol to total lipids ratio in medium HDL
MetS	2506.68	526	1.15e-254	2544.74	527	7.08e-261	0.00308033	0.0048928	Total lipids in medium HDL
MetS	2522.98	526	1.81e-257	2559.79	527	1.79e-263	0.00303269	0.00579797	Concentration of medium HDL particles
MetS	2543.22	526	5.88e-261	2581.14	527	3.66e-267	0.00307989	0.00528983	Phospholipids in medium HDL
MetS	1880.89	526	2.03e-151	1896.56	527	1.34e-153	-0.00195146	0.0368109	Phospholipids to total lipids ratio in medium HDL
MetS	2761.54	526	5.3e-299	2771.03	527	2.6e-300	-0.00154807	0.179451	Triglycerides in medium HDL
MetS	2192.23	526	1.27e-201	2237.93	527	6.95e-209	-0.00336614	0.000992458	Triglycerides to total lipids ratio in medium HDL
MetS	1703.73	526	3.45e-124	1703.74	527	6.19e-124	5.01e-05	0.955611	Total cholesterol in medium LDL
MetS	1689.91	526	4.11e-122	1689.92	527	7.36e-122	-4.42e-05	0.960709	Cholesterol esters in medium LDL
MetS	1842.07	526	2.33e-145	1844.32	527	1.95e-145	0.000745541	0.423161	Free cholesterol to total lipids ratio in medium LDL
MetS	1808.81	526	3.3e-140	1808.82	527	6.12e-140	1.9e-05	0.983691	Total lipid levels in medium LDL
MetS	1828.94	526	2.54e-143	1828.95	527	4.72e-143	-4.9e-05	0.958102	Concentration of medium LDL particles
MetS	2013.18	526	2.01e-172	2013.31	527	3.75e-172	0.000182921	0.851739	Phospholipids in medium LDL
MetS	2577.9	526	5.99e-267	2580.31	527	5.09e-267	-0.000777996	0.483793	Triglycerides in medium LDL
MetS	2277.01	526	1.02e-215	2282.15	527	2.94e-216	-0.00112975	0.276564	Triglycerides to total lipids ratio in medium LDL
MetS	2510.55	526	2.48e-255	2511.76	527	3.35e-255	-0.000555823	0.614714	Monounsaturated fatty acids (16:1, 18:1) levels
MetS	2583.33	526	6.88e-268	2593.91	527	2.25e-269	-0.00161775	0.142771	Ratio of monounsaturated fatty acids to total fatty acids
MetS	2610.68	526	1.25e-272	2626.85	527	4.34e-275	-0.00201949	0.0716473	Total cholesterol in medium VLDL
MetS	2489.06	526	1.21e-251	2489.72	527	2.03e-251	0.000401123	0.709119	Total cholesterol to total lipids ratio in medium VLDL
MetS	2523.11	526	1.72e-257	2536.5	527	1.86e-259	-0.00183867	0.0952507	Cholesterol esters in medium VLDL
MetS	2553.63	526	9.42e-263	2555.99	527	8.11e-263	0.000763264	0.485295	Cholesteryl esters to total lipids ratio in medium VLDL
MetS	2724.91	526	1.44e-292	2742.7	527	2.49e-295	-0.00211965	0.0644303	Free cholesterol in medium VLDL
MetS	2369.69	526	2.62e-231	2376.8	527	3.48e-232	-0.00131706	0.20945	Free cholesterol to total lipids ratio in medium VLDL
MetS	2684.57	526	1.67e-285	2702.22	527	3.11e-288	-0.00211278	0.0635116	Total lipids in medium VLDL
MetS	2689.44	526	2.36e-286	2707.19	527	4.2e-289	-0.00211872	0.0630351	Concentration of medium VLDL particles
MetS	2698.8	526	5.45e-288	2716.85	527	8.53e-291	-0.00213732	0.0612552	Phospholipids in medium VLDL
MetS	1731.81	526	1.98e-128	1734.87	527	1.24e-128	0.000865385	0.335546	Phospholipids to total lipids ratio in medium VLDL
MetS	2731.42	526	1.04e-293	2748.92	527	2.01e-296	-0.00210452	0.0669268	Triglycerides in medium VLDL
MetS	2494.18	526	1.6e-252	2496.71	527	1.29e-252	-0.000787505	0.465445	Triglycerides to total lipids ratio in medium VLDL
MetS	2913.5	526	0	2924.78	527	0	0.00167084	0.154189	Phosphatidylcholine and other choline levels
MetS	881.425	526	2.19e-20	883.089	527	2.02e-20	0.000640799	0.319439	Phenylalanine levels
MetS	1724.44	526	2.59e-127	1725.18	527	3.64e-127	0.000421567	0.636975	Ratio of polyunsaturated fatty acids to total fatty acids
MetS	2356	526	5.4e-229	2359.1	527	3.42e-229	-0.000878145	0.405471	Remnant cholesterol (non-HDL, non-LDL -cholesterol)
MetS	2771.94	526	7.82e-301	2791.57	527	6.26e-304	-0.00222868	0.0541637	Serum total triglyceride levels
MetS	2509.15	526	4.31e-255	2509.51	527	8.17e-255	0.000302371	0.784277	Saturated fatty acids
MetS	1436.65	526	1.48e-85	1438.09	527	1.55e-85	0.000594911	0.467646	Total cholesterol to total lipids ratio in small HDL
MetS	1413.61	526	2.18e-82	1414.59	527	2.62e-82	0.0004912	0.545617	Cholesteryl esters to total lipids ratio in small HDL
MetS	1245.46	526	2.99e-60	1245.79	527	4.2e-60	0.000278709	0.711288	Free cholesterol to total lipids ratio in small HDL
MetS	2588.27	526	9.61e-269	2621.75	527	3.34e-274	-0.00290704	0.00935887	Triglycerides in small HDL
MetS	2450.27	526	5.27e-245	2499.51	527	4.25e-253	-0.00348323	0.00122185	Triglycerides to total lipids ratio in small HDL
MetS	1781.27	526	5.71e-136	1781.52	527	9.64e-136	0.000248525	0.787149	Free cholesterol to total lipids ratio in small LDL
MetS	1882.64	526	1.08e-151	1882.72	527	1.98e-151	0.00014375	0.879211	Total lipids in small LDL
MetS	1910.49	526	4.51e-156	1910.51	527	8.54e-156	7.2e-05	0.939779	Concentration of small LDL particles
MetS	2129.86	526	2.34e-191	2131.52	527	2.53e-191	0.000644224	0.522271	Phospholipids in small LDL
MetS	2622.16	526	1.27e-274	2627.87	527	2.88e-275	-0.00120103	0.285119	Triglycerides in small LDL
MetS	2376.05	526	2.2e-232	2391.51	527	1.12e-234	-0.00196397	0.0648352	Triglycerides to total lipids ratio in small LDL
MetS	2045.07	526	1.46e-177	2053.4	527	1.3e-178	0.00147837	0.143963	Sphingomyelins levels
MetS	2451.17	526	3.69e-245	2464.99	527	3.48e-247	-0.00184651	0.0856226	Total cholesterol in small VLDL
MetS	2273.59	526	3.81e-215	2286.74	527	5.02e-217	0.00180162	0.0817184	Total cholesterol to total lipids ratio in small VLDL
MetS	2207.5	526	3.8e-204	2216.53	527	2.48e-205	-0.00149182	0.142897	Cholesterol esters in small VLDL
MetS	2344.88	526	4.06e-227	2358.08	527	5.09e-229	0.00180902	0.085851	Cholesteryl esters to total lipids ratio in small VLDL
MetS	2907.84	526	0	2930.73	527	0	-0.00238029	0.042336	Free cholesterol in small VLDL
MetS	1883.99	526	6.61e-152	1885.9	527	6.28e-152	0.000680251	0.4653	Free cholesterol to total lipids ratio in small VLDL
MetS	2872.04	526	0	2896.29	527	0	-0.00245903	0.0355327	Total lipids in small VLDL
MetS	2905.36	526	0	2930.96	527	0	-0.0025301	0.0317637	Concentration of small VLDL particles
MetS	2996.23	526	0	3021.55	527	0	-0.00251547	0.0354771	Phospholipids in small VLDL
MetS	2050.64	526	1.83e-178	2054.07	527	1.01e-178	0.000925359	0.348655	Phospholipids to total lipids ratio in small VLDL
MetS	3026.11	526	0	3056.95	527	0	-0.00279067	0.0209956	Triglycerides in small VLDL
MetS	2532.44	526	4.24e-259	2554.49	527	1.47e-262	-0.00233242	0.0327851	Triglycerides to total lipids ratio in small VLDL
MetS	2378.69	526	7.85e-233	2412.24	527	3.4e-238	-0.00291704	0.00666268	Ratio of triglycerides to phosphoglycerides
MetS	2759.99	526	9.92e-299	2771.52	527	2.13e-300	0.00170085	0.138813	Total cholines levels
MetS	2720.09	526	1.01e-291	2720.09	527	2.31e-291	-1.8e-05	0.987493	Total fatty acids
MetS	2772.02	526	7.56e-301	2782.87	527	2.13e-302	0.00165224	0.151975	Total phosphoglycerides levels
MetS	1503.85	526	5.87e-95	1508.99	527	1.86e-95	-0.00113669	0.180622	Tyrosine levels
MetS	6448.17	526	0	6474.77	527	0	0.00262929	0.14132	Estimated degree of unsaturation
MetS	1022.85	526	3.04e-34	1042.05	527	3.73e-36	0.00220459	0.00177108	Valine levels
MetS	2506.68	526	1.15e-254	2519.22	527	1.75e-256	-0.00176617	0.105385	Total cholesterol levels in VLDL
MetS	2635.67	526	5.66e-277	2652.57	527	1.45e-279	-0.0020587	0.0668594	Mean diameter of VLDL particles
MetS	2742.44	526	1.21e-295	2762.25	527	9.11e-299	-0.00223837	0.051822	Triglyceride levels in VLDL
MetS	3403.31	526	0	3431.94	527	0	0.00266391	0.0358804	Total cholesterol levels in very large HDL
MetS	1992.89	526	3.61e-169	2002.2	527	2.28e-170	-0.00153236	0.117746	Total cholesterol to total lipids ratio in very large HDL
MetS	3260.98	526	0	3287.08	527	0	0.00253974	0.0406611	Cholesterol esters in very large HDL
MetS	1996.41	526	9.87e-170	2007.24	527	3.53e-171	-0.00164941	0.0917322	Cholesteryl esters to total lipids ratio in very large HDL
MetS	3552.6	526	0	3585.99	527	0	0.00288694	0.0266151	Free cholesterol in very large HDL
MetS	4071.87	526	0	4107.68	527	0	0.00299368	0.031934	Total lipids in very large HDL
MetS	4151.37	526	0	4187.42	527	0	0.00300348	0.033047	Concentration of very large HDL particles
MetS	4153.78	526	0	4195.78	527	0	0.00324077	0.0214853	Phospholipids in very large HDL
MetS	1899.49	526	2.43e-154	1914.92	527	1.72e-156	0.00195899	0.0391835	Phospholipids to total lipids ratio in very large HDL
MetS	1978.88	526	6.29e-167	2009.18	527	1.73e-171	-0.00277281	0.00471696	Triglycerides to total lipids ratio in very large HDL
MetS	2058.37	526	1.03e-179	2067.01	527	8.14e-181	-0.00147735	0.137851	Total cholesterol in very large VLDL
MetS	1316.92	526	1.96e-69	1317.41	527	2.67e-69	0.000388749	0.656177	Total cholesterol to total lipids ratio in very large VLDL
MetS	2067.96	526	2.88e-181	2079.18	527	8.65e-183	-0.00168347	0.091754	Cholesterol esters in very large VLDL
MetS	1150.56	526	1.24e-48	1152.7	527	1.02e-48	-0.000801043	0.323672	Cholesteryl esters to total lipids ratio in very large VLDL
MetS	2031.49	526	2.27e-175	2036.79	527	6.25e-176	-0.00115657	0.241833	Free cholesterol in very large VLDL
MetS	1116.44	526	1.22e-44	1119.66	527	7.58e-45	0.000980236	0.219066	Free cholesterol to total lipids ratio in very large VLDL
MetS	2133.26	526	6.5e-192	2140.58	527	8.26e-193	-0.00136035	0.179518	Total lipids in very large VLDL
MetS	2135.29	526	3.01e-192	2142.68	527	3.74e-193	-0.00136579	0.178017	Concentration of very large VLDL particles
MetS	2092.86	526	2.58e-185	2098.13	527	7.15e-186	-0.00115386	0.250316	Phospholipids in very large VLDL
MetS	2169.61	526	6.92e-198	2177.19	527	7.92e-199	-0.00138436	0.175726	Triglycerides in very large VLDL
MetS	1402.14	526	7.99e-81	1404.48	527	6.28e-81	-0.000838649	0.349045	Triglycerides to total lipids ratio in very large VLDL
MetS	2212.23	526	6.24e-205	2213.24	527	8.7e-205	-0.000498594	0.623439	Total cholesterol in very small VLDL
MetS	2238.96	526	2.27e-209	2251.69	527	3.56e-211	0.00174549	0.0842518	Total cholesterol to total lipids ratio in very small VLDL
MetS	2090.49	526	6.28e-185	2091.04	527	1.02e-184	-0.000367797	0.709254	Cholesterol esters in very small VLDL
MetS	1974.32	526	3.37e-166	1984.98	527	1.3e-167	0.00161037	0.0924115	Cholesteryl esters to total lipids ratio in very small VLDL
MetS	2322.69	526	2.22e-223	2324.94	527	1.96e-223	-0.000742939	0.476216	Free cholesterol in very small VLDL
MetS	1333.27	526	1.38e-71	1335.64	527	1.07e-71	0.000750598	0.3339	Free cholesterol to total lipids ratio in very small VLDL
MetS	2511.34	526	1.81e-255	2516.13	527	5.96e-256	-0.00108584	0.317335	Total lipids in very small VLDL
MetS	2594.84	526	6.99e-270	2600.83	527	1.42e-270	-0.00121667	0.270922	Concentration of very small VLDL particles
MetS	2389.73	526	1.05e-234	2390.44	527	1.71e-234	-0.000418908	0.69406	Phospholipids in very small VLDL
MetS	1557.09	526	1.44e-102	1571.82	527	1.85e-104	0.00191285	0.0261104	Phospholipids to total lipids ratio in very small VLDL
MetS	3176.03	526	0	3209.39	527	0	-0.00289543	0.0191186	Triglycerides in very small VLDL
MetS	2926.39	526	0	2961.53	527	0	-0.00295298	0.012251	Triglycerides to total lipids ratio in very small VLDL
MetS	2034.86	526	6.49e-176	2040.59	527	1.52e-176	-0.00120258	0.224277	Total cholesterol levels in chylomicrons and extremely large VLDL
MetS	2067.46	526	3.47e-181	2073.15	527	8.21e-182	-0.00119877	0.229219	Cholesteryl ester levels in chylomicrons and extremely large VLDL
MetS	1987.35	526	2.79e-168	1991.3	527	1.27e-168	-0.000998359	0.307104	Free cholesterol levels in chylomicrons and extremely large VLDL
MetS	1277.03	526	2.89e-64	1280.23	527	1.76e-64	-0.000954178	0.25167	Free cholesterol to total lipids ratio in chylomicrons and extremely large VLDL
MetS	1973.93	526	3.88e-166	1977.33	527	2.16e-166	-0.000926301	0.341805	Total lipid levels in chylomicrons and extremely large VLDL
MetS	1963.57	526	1.74e-164	1966.95	527	9.75e-165	-0.000923833	0.341831	Concentration of chylomicrons and extremely large VLDL particles
MetS	2053.42	526	6.53e-179	2056.17	527	4.63e-179	-0.000834213	0.401095	Phospholipid levels in chylomicrons and extremely large VLDL
MetS	1384.82	526	1.79e-78	1385.01	527	2.75e-78	-0.000231654	0.78856	Phospholipids to total lipids ratio in chylomicrons and extremely large VLDL
MetS	1945.86	526	1.14e-161	1948.72	527	7.73e-162	-0.000849833	0.379677	Triglyceride levels in chylomicrons and extremely large VLDL

## Sheet: WC step1 sensitivity
Exposure	Q(MRegger)	Q_df(MRegger)	Q_pval(MRegger)	Q(IVW)	Q_df(IVW)	Q_pval(IVW)	egger_intercept	egger_intercept_p	Mediation
WC	537.687	297	4.1e-16	537.711	298	5.52e-16	-0.000119621	0.908738	Alanine levels
WC	699.007	297	1.93e-34	702.975	298	9.41e-35	0.0015275	0.195126	Apolipoprotein A-I levels
WC	2202.44	297	1.45e-287	2212.22	298	5.73e-289	0.0024172	0.251652	Apolipoprotein B levels
WC	2213.58	297	1.16e-289	2218.16	298	4.39e-290	0.00165553	0.434093	Ratio of apolipoprotein B to apolipoprotein A1 levels
WC	526.026	298	7.56e-15	526.027	299	1.01e-14	-1.96e-05	0.989289	Diacylglycerol levels
WC	527.625	298	5.31e-15	528.89	299	5.36e-15	-0.001229	0.398599	Estimated description of fatty acid chain length not actual carbon number
WC	534.325	297	8.8e-16	534.965	298	1.03e-15	-0.000634181	0.551405	Ratio of omega-6 fatty acids to total fatty acids
WC	559.363	297	2.62e-18	561.47	298	2.19e-18	-0.00120328	0.291002	Glucose levels
WC	471.446	297	4.5e-10	473.635	298	3.76e-10	-0.00117009	0.24122	Glutamine levels
WC	355.952	293	0.00691399	355.998	294	0.00768801	0.000316808	0.845303	Glycerol levels
WC	644.895	297	7.98e-28	645.323	298	1.05e-27	0.000525689	0.657264	Glycoprotein acetylation
WC	968.999	297	3.16e-72	969.778	298	4.37e-72	0.000679019	0.625589	Total cholesterol in HDL2
WC	535.265	297	7.11e-16	538.137	298	5.01e-16	0.00130964	0.207859	Total cholesterol in HDL3
WC	893.299	297	5.55e-61	894.558	298	6.32e-61	0.000865319	0.518182	Total cholesterol levels in HDL
WC	830.305	297	5.69e-52	830.332	298	9.45e-52	0.000128257	0.920753	Mean diameter of HDL particles
WC	664.43	297	3.64e-30	667.871	298	2.09e-30	0.00141811	0.215879	Free cholesterol to total lipids ratio in IDL
WC	764.433	297	6.09e-43	764.855	298	8.61e-43	-0.000495358	0.685912	Phospholipids to total lipids ratio in IDL
WC	1195.55	297	5.37e-108	1206.75	298	1.58e-109	0.00259935	0.0963385	Triglycerides in IDL
WC	710.298	297	7.17e-36	711.143	298	8.69e-36	-0.00070492	0.552918	Triglycerides to total lipids ratio in IDL
WC	560.165	297	2.17e-18	562.535	298	1.7e-18	-0.00119809	0.263189	Isoleucine levels
WC	581.591	297	1.18e-20	582.514	298	1.32e-20	-0.000726376	0.492797	Ratio of 18:2 linoleic acid to total fatty acids
WC	1230.45	297	9.76e-114	1243.74	298	1.27e-115	0.00282721	0.0743236	Triglyceride levels in LDL
WC	549.894	297	2.45e-17	554.14	298	1.24e-17	-0.00159045	0.131029	Leucine levels
WC	1100.14	297	1.35e-92	1100.19	298	2.57e-92	0.000159413	0.914631	Total cholesterol in large HDL
WC	830.913	297	4.67e-52	832.107	298	5.33e-52	-0.00085121	0.514094	Total cholesterol to total lipids ratio in large HDL
WC	1121.92	297	4.53e-96	1121.92	298	8.81e-96	5.63e-05	0.970091	Cholesterol esters in large HDL
WC	1023.07	297	1.69e-80	1023.31	298	2.88e-80	0.000373434	0.793963	Free cholesterol in large HDL
WC	619.181	297	7.84e-25	619.208	298	1.13e-24	0.000126932	0.909919	Free cholesterol to total lipids ratio in large HDL
WC	1067.44	297	2.02e-87	1067.56	298	3.67e-87	0.000268241	0.854735	Total lipids in large HDL
WC	1064.22	297	6.48e-87	1064.32	298	1.19e-86	0.000240747	0.86936	Concentration of large HDL particles
WC	1046.26	297	4.2e-84	1046.5	298	7.25e-84	0.000375609	0.79594	Phospholipids in large HDL
WC	627.178	297	9.44e-26	628.195	298	1.05e-25	0.000790274	0.488242	Phospholipids to total lipids ratio in large HDL
WC	513.197	297	9.33e-14	513.201	298	1.23e-13	-4.62e-05	0.963737	Triglycerides in large HDL
WC	732.694	297	9.37e-39	732.775	298	1.44e-38	-0.000222577	0.856488	Triglycerides to total lipids ratio in large HDL
WC	1192.74	297	1.55e-107	1194.89	298	1.38e-107	-0.00112124	0.46438	Free cholesterol to total lipids ratio in large LDL
WC	756.063	297	7.94e-42	756.927	298	9.76e-42	-0.000715608	0.560571	Triglycerides to total lipids ratio in large LDL
WC	930.314	297	1.99e-66	930.321	298	3.52e-66	6.69e-05	0.961356	Total Cholesterol in large VLDL
WC	951.102	297	1.57e-69	951.145	298	2.78e-69	0.00016203	0.907642	Cholesterol esters in large VLDL
WC	893.303	297	5.54e-61	893.307	298	9.62e-61	4.63e-05	0.972679	Free cholesterol in large VLDL
WC	517.368	297	3.79e-14	518.266	298	4.13e-14	0.000796041	0.473298	Free cholesterol to total lipids ratio in large VLDL
WC	894.725	297	3.44e-61	894.747	298	5.94e-61	0.000115756	0.931917	Total lipids in large VLDL
WC	886.36	297	5.66e-60	886.383	298	9.73e-60	0.000118119	0.930204	Concentration of large VLDL particles
WC	932.448	297	9.59e-67	932.549	298	1.64e-66	0.000248806	0.857219	Phospholipids in large VLDL
WC	860.014	297	3.53e-56	860.022	298	6e-56	6.62e-05	0.960275	Triglycerides in large VLDL
WC	971.06	297	1.54e-72	971.286	298	2.59e-72	0.000369287	0.79254	Total cholesterol levels in medium HDL
WC	887.896	297	3.39e-60	888.846	298	4.28e-60	-0.000745073	0.573538	Total cholesterol to total lipids ratio in medium HDL
WC	1008.71	297	2.77e-78	1008.78	298	4.99e-78	0.000207117	0.885071	Cholesterol esters in medium HDL
WC	913.103	297	6.98e-64	915.42	298	5.59e-64	-0.00116776	0.386001	Cholesteryl esters to total lipids ratio in medium HDL
WC	818.953	297	2.19e-50	820.356	298	2.33e-50	0.000915161	0.476246	Free cholesterol in medium HDL
WC	570.557	297	1.77e-19	573.454	298	1.22e-19	0.00130513	0.220427	Free cholesterol to total lipids ratio in medium HDL
WC	904.955	297	1.1e-62	905.729	298	1.48e-62	0.000682371	0.614407	Total lipids in medium HDL
WC	889.373	297	2.07e-60	890.195	298	2.72e-60	0.000701544	0.600811	Concentration of medium HDL particles
WC	864.345	297	8.47e-57	865.847	298	8.83e-57	0.000949236	0.473066	Phospholipids in medium HDL
WC	721.43	297	2.69e-37	723.466	298	2.3e-37	0.00108777	0.360609	Phospholipids to total lipids ratio in medium HDL
WC	688.296	297	4.24e-33	688.322	298	6.43e-33	0.000125935	0.915508	Triglycerides in medium HDL
WC	891.475	297	1.02e-60	891.557	298	1.73e-60	-0.000219844	0.869414	Triglycerides to total lipids ratio in medium HDL
WC	1161.43	297	1.94e-102	1176.49	298	1.39e-104	0.00300738	0.0507109	Triglycerides in medium LDL
WC	1052.38	297	4.65e-85	1059.94	298	5.76e-86	0.00215272	0.145117	Monounsaturated fatty acids (16:1, 18:1) levels
WC	573.331	297	9e-20	573.814	298	1.12e-19	0.000535766	0.617088	Ratio of monounsaturated fatty acids to total fatty acids
WC	1185.89	297	2.04e-106	1186.8	298	2.89e-106	0.000744742	0.632636	Total cholesterol in medium VLDL
WC	594.74	297	4.34e-22	598.739	298	2.24e-22	0.00152842	0.158654	Total cholesterol to total lipids ratio in medium VLDL
WC	1261.25	297	7.64e-119	1262.69	298	9.07e-119	0.000935257	0.560425	Cholesterol esters in medium VLDL
WC	578.475	297	2.54e-20	581.688	298	1.61e-20	0.00137548	0.19998	Cholesteryl esters to total lipids ratio in medium VLDL
WC	1042.91	297	1.4e-83	1043.24	298	2.34e-83	0.000445497	0.760531	Free cholesterol in medium VLDL
WC	645.76	297	6.3e-28	646.38	298	7.88e-28	0.000602694	0.59375	Free cholesterol to total lipids ratio in medium VLDL
WC	1065.1	297	4.71e-87	1065.34	298	8.19e-87	0.000384901	0.794551	Total lipids in medium VLDL
WC	1047.49	297	2.7e-84	1047.68	298	4.76e-84	0.000332288	0.820652	Concentration of medium VLDL particles
WC	1114.4	297	7.23e-95	1114.86	298	1.19e-94	0.000529222	0.726349	Phospholipids in medium VLDL
WC	466.118	297	1.23e-09	474.998	298	2.9e-10	0.00228124	0.0180043	Phospholipids to total lipids ratio in medium VLDL
WC	958.386	297	1.26e-70	958.43	298	2.24e-70	0.000162902	0.907491	Triglycerides in medium VLDL
WC	562.862	297	1.14e-18	568.845	298	3.73e-19	-0.00187507	0.0766403	Triglycerides to total lipids ratio in medium VLDL
WC	760.826	297	1.85e-42	769.579	298	2.01e-43	0.00227535	0.0655301	Phosphatidylcholine and other choline levels
WC	473.072	297	3.3e-10	483.998	298	5.03e-11	-0.00253607	0.00927048	Phenylalanine levels
WC	536.744	297	5.09e-16	536.815	298	6.76e-16	-0.000202111	0.843941	Ratio of polyunsaturated fatty acids to total fatty acids
WC	355.4	297	0.0112472	359.531	298	0.00837588	0.001862	0.0641368	Pyruvate levels
WC	1895.49	297	1.63e-230	1903.91	298	1.18e-231	0.00223428	0.251577	Remnant cholesterol (non-HDL, non-LDL -cholesterol)
WC	1068.68	297	1.29e-87	1069.28	298	1.97e-87	0.000604635	0.683101	Serum total triglyceride levels
WC	1227.3	297	3.23e-113	1231.38	298	1.4e-113	-0.00152938	0.32117	Free cholesterol to total lipids ratio in small HDL
WC	827.332	297	1.48e-51	827.387	298	2.44e-51	0.000183536	0.887776	Triglycerides in small HDL
WC	821.19	297	1.07e-50	821.697	298	1.52e-50	-0.000547392	0.668916	Triglycerides to total lipids ratio in small HDL
WC	1269.2	297	3.61e-120	1278.88	298	1.82e-121	0.00242657	0.133391	Triglycerides in small LDL
WC	553.162	297	1.14e-17	553.429	298	1.47e-17	-0.000399951	0.704859	Triglycerides to total lipids ratio in small LDL
WC	1471.91	297	1.03e-154	1477.64	298	2.33e-155	0.00183783	0.283039	Total cholesterol in small VLDL
WC	689.994	297	2.61e-33	694.419	298	1.12e-33	0.00161828	0.168616	Total cholesterol to total lipids ratio in small VLDL
WC	1496.97	297	4.49e-159	1503.54	298	7.22e-160	0.00196623	0.254403	Cholesterol esters in small VLDL
WC	721.173	297	2.9e-37	724.893	298	1.51e-37	0.00148683	0.216782	Cholesteryl esters to total lipids ratio in small VLDL
WC	1277.01	297	1.8e-121	1280.7	298	9.04e-122	0.00148203	0.354896	Free cholesterol in small VLDL
WC	437.329	297	2.02e-07	443.796	298	8.33e-08	0.00193641	0.036963	Free cholesterol to total lipids ratio in small VLDL
WC	1294.35	297	2.25e-124	1296.81	298	1.82e-124	0.00121428	0.453068	Total lipids in small VLDL
WC	1247.14	297	1.69e-116	1249.12	298	1.63e-116	0.0010909	0.492833	Concentration of small VLDL particles
WC	1197.33	297	2.75e-108	1200.25	298	1.84e-108	0.00132437	0.395435	Phospholipids in small VLDL
WC	1125.61	297	1.16e-96	1125.85	298	2.07e-96	0.000377972	0.801326	Phospholipids to total lipids ratio in small VLDL
WC	1033.24	297	4.48e-82	1033.64	298	7.26e-82	0.000490931	0.73582	Triglycerides in small VLDL
WC	576.354	297	4.29e-20	581.955	298	1.51e-20	-0.00182048	0.0903751	Triglycerides to total lipids ratio in small VLDL
WC	864.262	297	8.7e-57	864.289	298	1.47e-56	-0.000127474	0.923756	Ratio of triglycerides to phosphoglycerides
WC	804.34	297	2.32e-48	812.663	298	2.72e-49	0.00223274	0.0806152	Total cholines levels
WC	758.788	297	3.45e-42	766.28	298	5.55e-43	0.00212875	0.0878575	Total phosphoglycerides levels
WC	569.251	297	2.43e-19	582.397	298	1.35e-20	-0.00281266	0.0092758	Tyrosine levels
WC	594.283	297	4.88e-22	598.372	298	2.46e-22	-0.00157231	0.153931	Valine levels
WC	1456.58	297	4.72e-152	1459.58	298	3.16e-152	0.00134137	0.43411	Total cholesterol levels in VLDL
WC	666.031	297	2.33e-30	668.804	298	1.61e-30	-0.00129171	0.267014	Mean diameter of VLDL particles
WC	997.49	297	1.46e-76	997.567	298	2.61e-76	0.000215689	0.880161	Triglyceride levels in VLDL
WC	595.629	297	3.47e-22	595.984	298	4.51e-22	0.000458729	0.674481	Total cholesterol levels in very large HDL
WC	954.176	297	5.43e-70	954.179	298	9.74e-70	3.82e-05	0.978173	Total cholesterol to total lipids ratio in very large HDL
WC	593.449	297	6.02e-22	593.723	298	7.98e-22	0.000403022	0.711301	Cholesterol esters in very large HDL
WC	872.523	297	5.66e-58	872.524	298	9.73e-58	1.08e-05	0.993557	Cholesteryl esters to total lipids ratio in very large HDL
WC	595.91	297	3.23e-22	596.687	298	3.77e-22	0.000681785	0.534031	Free cholesterol in very large HDL
WC	629.136	297	5.6e-26	629.613	298	7.21e-26	0.000534648	0.635345	Total lipids in very large HDL
WC	633.245	297	1.86e-26	633.717	298	2.41e-26	0.000531262	0.638579	Concentration of very large HDL particles
WC	725.65	297	7.68e-38	726.218	298	1.02e-37	0.000582808	0.630105	Phospholipids in very large HDL
WC	1001.98	297	2.99e-77	1002.07	298	5.33e-77	-0.000234677	0.868521	Phospholipids to total lipids ratio in very large HDL
WC	774.012	297	3.16e-44	774.183	298	4.84e-44	-0.000323081	0.798025	Triglycerides to total lipids ratio in very large HDL
WC	903.012	297	2.12e-62	903.032	298	3.67e-62	-0.000109727	0.935648	Total cholesterol in very large VLDL
WC	379.75	297	0.000816983	379.78	298	0.000930895	0.000146687	0.879441	Total cholesterol to total lipids ratio in very large VLDL
WC	894.021	297	4.35e-61	894.067	298	7.45e-61	-0.000167234	0.901577	Cholesterol esters in very large VLDL
WC	903.662	297	1.7e-62	903.675	298	2.96e-62	8.95e-05	0.947508	Free cholesterol in very large VLDL
WC	848.298	297	1.64e-54	848.302	298	2.78e-54	-5e-05	0.96973	Total lipids in very large VLDL
WC	837.662	297	5.25e-53	837.68	298	8.79e-53	-0.000104078	0.936665	Concentration of very large VLDL particles
WC	888	297	3.27e-60	888.079	298	5.52e-60	0.000218818	0.871107	Phospholipids in very large VLDL
WC	811.242	297	2.58e-49	811.259	298	4.26e-49	-0.000100503	0.937854	Triglycerides in very large VLDL
WC	435.036	297	2.96e-07	438.716	298	1.96e-07	-0.00163215	0.113992	Triglycerides to total lipids ratio in very large VLDL
WC	1436.66	297	1.31e-148	1446.34	298	6.17e-150	0.00237846	0.158277	Total cholesterol in very small VLDL
WC	1371.13	297	2.31e-137	1379.16	298	2.12e-138	0.00216558	0.18812	Cholesterol esters in very small VLDL
WC	450.859	297	1.98e-08	451.408	298	2.23e-08	0.000558778	0.548181	Free cholesterol to total lipids ratio in very small VLDL
WC	1671.94	297	5.35e-190	1683.61	298	1.04e-191	0.00262171	0.150881	Total lipids in very small VLDL
WC	1664.54	297	1.13e-188	1676.31	298	2.1e-190	0.00263441	0.148344	Concentration of very small VLDL particles
WC	860.13	297	3.4e-56	869.498	298	2.65e-57	0.00235667	0.0731015	Phospholipids to total lipids ratio in very small VLDL
WC	1203.46	297	2.72e-109	1206.73	298	1.59e-109	0.00140617	0.369401	Triglycerides in very small VLDL
WC	600.498	297	1e-22	602.963	298	7.62e-23	-0.00121045	0.270438	Triglycerides to total lipids ratio in very small VLDL
WC	964.599	297	1.46e-71	964.689	298	2.56e-71	0.000234432	0.867388	Total cholesterol levels in chylomicrons and extremely large VLDL
WC	1057.53	297	7.25e-86	1057.84	298	1.23e-85	0.000427981	0.770959	Cholesteryl ester levels in chylomicrons and extremely large VLDL
WC	812.447	297	1.76e-49	812.47	298	2.89e-49	0.000117765	0.927192	Free cholesterol levels in chylomicrons and extremely large VLDL
WC	567.748	297	3.5e-19	568.938	298	3.65e-19	-0.000901259	0.43078	Free cholesterol to total lipids ratio in chylomicrons and extremely large VLDL
WC	960.938	297	5.21e-71	961.178	298	8.65e-71	0.000380964	0.785821	Total lipid levels in chylomicrons and extremely large VLDL
WC	967.976	297	4.52e-72	968.175	298	7.63e-72	0.000347299	0.805081	Concentration of chylomicrons and extremely large VLDL particles
WC	903.295	297	1.92e-62	903.647	298	2.99e-62	0.000462174	0.733853	Phospholipid levels in chylomicrons and extremely large VLDL
WC	966.729	297	6.97e-72	967.048	298	1.13e-71	0.000440005	0.754424	Triglyceride levels in chylomicrons and extremely large VLDL

## Sheet: TG step1 sensitivity
Exposure	Q(MRegger)	Q_df(MRegger)	Q_pval(MRegger)	Q(IVW)	Q_df(IVW)	Q_pval(IVW)	egger_intercept	egger_intercept_p	Mediation
TG	1026.69	34	1.31e-193	1027.22	35	5.62e-193	0.00114221	0.895731	Apolipoprotein B levels
TG	1499.55	34	1.16e-293	1499.96	35	6.36e-293	0.001003	0.924382	Ratio of apolipoprotein B to apolipoprotein A1 levels
TG	226.561	34	2.59e-30	226.759	35	6.23e-30	-0.00103445	0.864194	Conjugated linoleic acid
TG	174.64	34	7.97e-21	174.64	35	1.83e-20	7.98e-06	0.998799	Ratio of conjugated linoleic acid to total fatty acids
TG	242.732	34	2.38e-33	243.689	35	4.26e-33	-0.00218852	0.716448	Diacylglycerol levels
TG	229.264	34	8.1e-31	234.705	35	2.06e-31	0.00522129	0.37536	Ratio of diacylglycerol to triglycerides
TG	229.495	34	7.34e-31	241.312	35	1.19e-32	-0.00760257	0.194611	Estimated description of fatty acid chain length not actual carbon number
TG	1856.6	34	0	1858.13	35	0	0.00195827	0.867794	Omega-6 fatty acids levels
TG	405.778	34	3.29e-65	420.958	35	1.06e-67	0.00626387	0.267303	Ratio of omega-6 fatty acids to total fatty acids
TG	123.309	34	4.68e-12	145.73	35	1.83e-15	-0.014184	0.0179783	Glycerol levels
TG	286.934	34	8.54e-42	366.382	35	7.71e-57	-0.014555	0.00420857	Glycoprotein acetylation
TG	4276.6	34	0	4276.83	35	0	0.000755144	0.965788	Total cholesterol in HDL2
TG	4563.45	34	0	4564.26	35	0	0.00141052	0.938234	Total cholesterol levels in HDL
TG	7455.28	34	0	7463.48	35	0	0.00447101	0.847772	Mean diameter of HDL particles
TG	4002.32	34	0	4045.7	35	0	0.0104493	0.547811	Triglyceride levels in HDL
TG	2207.67	34	0	2245.14	35	0	-0.00946487	0.452713	Cholesteryl esters to total lipids ratio in IDL
TG	1159.68	34	1.21e-221	1187.21	35	1.1e-226	0.00812572	0.375307	Free cholesterol to total lipids ratio in IDL
TG	2228.36	34	0	2326.58	35	0	0.0156176	0.229306	Concentration of IDL particles
TG	1922.2	34	0	1923.78	35	0	-0.0019412	0.868298	Phospholipids to total lipids ratio in IDL
TG	5152.95	34	0	5321.19	35	0	0.0204472	0.299495	Triglycerides in IDL
TG	2648.92	34	0	2692.27	35	0	0.0102941	0.460862	Triglycerides to total lipids ratio in IDL
TG	299.561	34	3.06e-44	317.641	35	2.85e-47	-0.00670169	0.161133	Isoleucine levels
TG	1619.67	34	0	1643.47	35	0	0.00764666	0.484457	Linoleic acid (18:2) levels
TG	2645.88	34	0	2750.29	35	0	0.0156699	0.254807	Ratio of 18:2 linoleic acid to total fatty acids
TG	4857.1	34	0	5020.25	35	0	0.0202125	0.292736	Triglyceride levels in LDL
TG	345.403	34	3.27e-53	350.145	35	1.23e-53	-0.00342602	0.499101	Leucine levels
TG	6175.7	34	0	6185.36	35	0	0.00484721	0.818972	Total cholesterol in large HDL
TG	2457.58	34	0	2469.07	35	0	-0.00535381	0.692611	Total cholesterol to total lipids ratio in large HDL
TG	6210.24	34	0	6218.78	35	0	0.00455626	0.830111	Cholesterol esters in large HDL
TG	1891.56	34	0	1924.82	35	0	-0.00910952	0.444707	Cholesteryl esters to total lipids ratio in large HDL
TG	5975.04	34	0	5988.11	35	0	0.00563815	0.786749	Free cholesterol in large HDL
TG	2480.78	34	0	2481.64	35	0	0.00146326	0.913912	Free cholesterol to total lipids ratio in large HDL
TG	6302.55	34	0	6320.39	35	0	0.00658726	0.758265	Total lipids in large HDL
TG	6392.92	34	0	6413.28	35	0	0.00703346	0.744139	Concentration of large HDL particles
TG	5727.16	34	0	5748.44	35	0	0.00719974	0.724432	Phospholipids in large HDL
TG	2199.35	34	0	2230.29	35	0	0.00883904	0.493865	Triglycerides to total lipids ratio in large HDL
TG	1886.12	34	0	1901.94	35	0	-0.00623769	0.596827	Total cholesterol to total lipids ratio in large LDL
TG	602.774	34	3.01e-105	605.559	35	3.43e-105	0.00258681	0.694341	Free cholesterol to total lipids ratio in large LDL
TG	1517.64	34	1.66e-297	1565.15	35	8.97e-307	0.0108926	0.3095	Concentration of large LDL particles
TG	5646.79	34	0	5866.6	35	0	0.0234127	0.257996	Triglycerides in large LDL
TG	4712.65	34	0	4845.03	35	0	0.0180086	0.335332	Triglycerides to total lipids ratio in large LDL
TG	444.634	34	5.15e-73	515.558	35	8.5e-87	-0.0133153	0.025949	Total Cholesterol in large VLDL
TG	588.355	34	2.77e-102	644.183	35	3.88e-113	-0.0118252	0.0813592	Cholesterol esters in large VLDL
TG	1806.81	34	0	1996.84	35	0	0.0225675	0.0671684	Cholesteryl esters to total lipids ratio in large VLDL
TG	348.494	34	8.04e-54	435.027	35	1.6e-70	-0.0147011	0.00640474	Free cholesterol in large VLDL
TG	859.837	34	1.31e-158	875.822	35	3.05e-161	0.00681219	0.432111	Free cholesterol to total lipids ratio in large VLDL
TG	501.007	34	1.98e-84	620.117	35	3.49e-108	-0.0172532	0.00750537	Total lipids in large VLDL
TG	522.161	34	9.76e-89	647.391	35	8.47e-114	-0.0176916	0.00727256	Concentration of large VLDL particles
TG	445.412	34	3.59e-73	547.868	35	2.22e-93	-0.0160117	0.00843734	Phospholipids in large VLDL
TG	591.501	34	6.24e-103	737.834	35	1.67e-132	-0.0191227	0.00649265	Triglycerides in large VLDL
TG	2493.94	34	0	2535.14	35	0	-0.00992912	0.458728	Total cholesterol to total lipids ratio in medium HDL
TG	2030.11	34	0	2030.46	35	0	-0.000927508	0.939537	Cholesterol esters in medium HDL
TG	3381.39	34	0	3474.47	35	0	-0.0149596	0.34017	Cholesteryl esters to total lipids ratio in medium HDL
TG	2452.77	34	0	2501.9	35	0	0.0109061	0.414997	Free cholesterol to total lipids ratio in medium HDL
TG	2703.87	34	0	2789.99	35	0	0.0144189	0.305388	Phospholipids to total lipids ratio in medium HDL
TG	1607.54	34	0	1638.42	35	0	0.00879816	0.424602	Triglycerides in medium HDL
TG	1869.32	34	0	1888.74	35	0	0.00691292	0.556277	Triglycerides to total lipids ratio in medium HDL
TG	1124	34	4.12e-214	1124.01	35	2.38e-213	0.00012801	0.988698	Total cholesterol to total lipids ratio in medium LDL
TG	1294.63	34	3.48e-250	1327.91	35	1.96e-256	-0.0089579	0.356458	Free cholesterol to total lipids ratio in medium LDL
TG	1104.91	34	4.36e-210	1124.52	35	1.85e-213	0.00699964	0.442663	Total lipid levels in medium LDL
TG	1144.29	34	2.15e-218	1166.57	35	2.51e-222	0.00746115	0.421558	Concentration of medium LDL particles
TG	967.046	34	4.5e-181	971.749	35	2.5e-181	0.00342651	0.686818	Phospholipids in medium LDL
TG	4742.74	34	0	4910.89	35	0	0.0205348	0.279956	Triglycerides in medium LDL
TG	4947.25	34	0	5085.19	35	0	0.0184478	0.337109	Triglycerides to total lipids ratio in medium LDL
TG	1049	34	2.64e-198	1051.7	35	4e-198	-0.00261682	0.769137	Monounsaturated fatty acids (16:1, 18:1) levels
TG	1209.98	34	2.85e-232	1214.03	35	2.4e-232	-0.00315183	0.738011	Ratio of monounsaturated fatty acids to total fatty acids
TG	627.001	34	3.09e-110	660.884	35	1.4e-116	-0.00921404	0.1842	Total cholesterol in medium VLDL
TG	870.092	34	9.42e-161	882.386	35	1.3e-162	-0.00555193	0.492957	Cholesterol esters in medium VLDL
TG	2722.88	34	0	2965.82	35	0	0.024291	0.0906027	Cholesteryl esters to total lipids ratio in medium VLDL
TG	463.248	34	8.99e-77	533.4	35	1.99e-90	-0.0132397	0.0297248	Free cholesterol in medium VLDL
TG	2767.71	34	0	2803.46	35	0	0.00929476	0.511949	Free cholesterol to total lipids ratio in medium VLDL
TG	645.831	34	4.04e-114	746.578	35	2.56e-134	-0.015873	0.0275244	Total lipids in medium VLDL
TG	685.838	34	2.16e-122	797.174	35	7.77e-145	-0.0166876	0.0247547	Concentration of medium VLDL particles
TG	600.645	34	8.24e-105	678.121	35	3.86e-120	-0.0139218	0.0437719	Phospholipids in medium VLDL
TG	2139.03	34	0	2571.3	35	0	0.0323231	0.0130081	Phospholipids to total lipids ratio in medium VLDL
TG	904.34	34	6.38e-168	1061.96	35	2.77e-200	-0.0198588	0.0203221	Triglycerides in medium VLDL
TG	2222.17	34	0	2222.33	35	0	-0.000634293	0.960667	Polyunsaturated fatty acids
TG	609.853	34	1.05e-106	611.742	35	1.84e-106	0.00212564	0.747527	Ratio of polyunsaturated fatty acids to total fatty acids
TG	218.605	34	7.87e-29	220.665	35	8.41e-29	-0.00268034	0.575004	Pyruvate levels
TG	1366.98	34	1.62e-265	1377.75	35	5.4e-267	0.0051547	0.608082	Remnant cholesterol (non-HDL, non-LDL -cholesterol)
TG	500.642	34	2.35e-84	525.214	35	9.23e-89	-0.00784923	0.205136	Serum total triglyceride levels
TG	1691.97	34	0	1692	35	0	-0.000284033	0.979951	Saturated fatty acids
TG	445.996	34	2.74e-73	450.148	35	1.46e-73	0.00316509	0.577385	Ratio of saturated fatty acids to total fatty acids
TG	520.176	34	2.48e-88	521.268	35	5.87e-88	0.00162645	0.790972	Total cholesterol to total lipids ratio in small HDL
TG	536.996	34	9.16e-92	538.263	35	2.03e-91	0.00175437	0.778678	Cholesteryl esters to total lipids ratio in small HDL
TG	1741.33	34	0	1741.54	35	0	0.000721492	0.948782	Free cholesterol in small HDL
TG	2080.9	34	0	2080.95	35	0	-0.000336431	0.97838	Phospholipids in small HDL
TG	1518.44	34	1.12e-297	1537.69	35	6.14e-301	0.00695324	0.515898	Triglycerides in small HDL
TG	1888.66	34	0	1908.22	35	0	0.00691941	0.556822	Triglycerides to total lipids ratio in small HDL
TG	900.025	34	5.11e-167	909.736	35	2.46e-168	0.00486957	0.548751	Total cholesterol to total lipids ratio in small LDL
TG	899.007	34	8.35e-167	915.968	35	1.22e-169	0.00643847	0.428745	Cholesteryl esters to total lipids ratio in small LDL
TG	858.832	34	2.13e-158	861.02	35	3.78e-158	0.00232686	0.770329	Free cholesterol in small LDL
TG	1313.36	34	3.77e-254	1336.57	35	2.87e-258	-0.00753895	0.44361	Free cholesterol to total lipids ratio in small LDL
TG	1077.66	34	2.42e-204	1084.73	35	4.47e-205	0.00420381	0.639762	Total lipids in small LDL
TG	1102.77	34	1.23e-209	1110.42	35	1.74e-210	0.00437182	0.630469	Concentration of small LDL particles
TG	993.982	34	9.88e-187	994.086	35	5.12e-186	-0.000510565	0.952614	Phospholipids in small LDL
TG	2581.53	34	0	2618.69	35	0	0.00965312	0.488958	Triglycerides in small LDL
TG	2725.32	34	0	2757.64	35	0	0.008956	0.529628	Triglycerides to total lipids ratio in small LDL
TG	1246.65	34	5.01e-240	1251.84	35	2.44e-240	0.00356127	0.709006	Total cholesterol in small VLDL
TG	1180.75	34	4.3e-226	1312.8	35	3.09e-253	0.0179882	0.059459	Total cholesterol to total lipids ratio in small VLDL
TG	1332.44	34	3.41e-258	1343.45	35	9.99e-260	0.00518377	0.599375	Cholesterol esters in small VLDL
TG	973.291	34	2.2e-182	1065.14	35	5.95e-201	0.0150383	0.0821603	Cholesteryl esters to total lipids ratio in small VLDL
TG	1067.84	34	2.85e-202	1068.02	35	1.47e-201	0.000664991	0.940031	Free cholesterol in small VLDL
TG	835.15	34	1.9e-153	839.954	35	9.42e-154	-0.00344479	0.661096	Total lipids in small VLDL
TG	769.01	34	1.17e-139	778.233	35	6.78e-141	-0.00477574	0.527378	Concentration of small VLDL particles
TG	1021.29	34	1.79e-192	1021.38	35	9.47e-192	0.000468965	0.956924	Phospholipids in small VLDL
TG	1689.87	34	0	1942.42	35	0	0.0249034	0.0307429	Phospholipids to total lipids ratio in small VLDL
TG	602.224	34	3.9e-105	649.046	35	3.86e-114	-0.0108149	0.113211	Triglycerides in small VLDL
TG	1558.65	34	3.15e-306	1768.02	35	0	-0.0226078	0.0398698	Triglycerides to total lipids ratio in small VLDL
TG	653.456	34	1.08e-115	712.025	35	3.74e-127	-0.0121279	0.0898982	Ratio of triglycerides to phosphoglycerides
TG	1689.43	34	0	1690.12	35	0	-0.00131033	0.907525	Total fatty acids
TG	5248.87	34	0	5313.33	35	0	-0.0128494	0.522529	Estimated degree of unsaturation
TG	1016.17	34	2.14e-191	1016.28	35	1.11e-190	-0.000538757	0.950349	Total cholesterol levels in VLDL
TG	1669.35	34	0	1942.84	35	0	-0.0260851	0.0241472	Mean diameter of VLDL particles
TG	548.511	34	4.06e-94	643.217	35	6.14e-113	-0.0153849	0.0208728	Triglyceride levels in VLDL
TG	4740.8	34	0	4750.31	35	0	-0.00481125	0.795624	Total cholesterol levels in very large HDL
TG	3365.08	34	0	3445.68	35	0	-0.014181	0.37317	Total cholesterol to total lipids ratio in very large HDL
TG	4355.81	34	0	4366.73	35	0	-0.00514648	0.772171	Cholesterol esters in very large HDL
TG	3458.87	34	0	3512.97	35	0	-0.0116098	0.470866	Cholesteryl esters to total lipids ratio in very large HDL
TG	5420.86	34	0	5426.67	35	0	-0.00377709	0.849719	Free cholesterol in very large HDL
TG	6643.93	34	0	6644.32	35	0	-0.000975121	0.96481	Total lipids in very large HDL
TG	6900.84	34	0	6900.89	35	0	-0.000371201	0.986853	Concentration of very large HDL particles
TG	7172.02	34	0	7174.7	35	0	0.00256115	0.911044	Phospholipids in very large HDL
TG	2476.69	34	0	2536.48	35	0	0.0120917	0.371304	Phospholipids to total lipids ratio in very large HDL
TG	794.092	34	6.98e-145	798.286	35	4.56e-145	0.0032523	0.674409	Triglycerides to total lipids ratio in very large HDL
TG	395.842	34	3.19e-63	466.916	35	6.09e-77	-0.0133295	0.0186526	Total cholesterol in very large VLDL
TG	1346.81	34	3.06e-261	1439.14	35	5.17e-280	0.0166815	0.136076	Total cholesterol to total lipids ratio in very large VLDL
TG	465.109	34	3.78e-77	531.697	35	4.42e-90	-0.0129102	0.0342217	Cholesterol esters in very large VLDL
TG	1174.42	34	9.31e-225	1251.26	35	3.24e-240	0.0151113	0.14507	Cholesteryl esters to total lipids ratio in very large VLDL
TG	338.089	34	9.02e-52	413.392	35	3.46e-66	-0.0137036	0.00943332	Free cholesterol in very large VLDL
TG	680.761	34	2.43e-121	716.914	35	3.63e-128	0.0103598	0.187934	Free cholesterol to total lipids ratio in very large VLDL
TG	419.47	34	5.94e-68	522.61	35	3.13e-88	-0.0160467	0.00664101	Total lipids in very large VLDL
TG	432.455	34	1.46e-70	538.162	35	2.13e-91	-0.0162463	0.00678655	Concentration of very large VLDL particles
TG	371.002	34	2.82e-58	460.979	35	9.62e-76	-0.0149993	0.00698386	Phospholipids in very large VLDL
TG	470.267	34	3.42e-78	586.597	35	2.66e-101	-0.0170453	0.00649497	Triglycerides in very large VLDL
TG	1344.56	34	9.17e-261	1425.28	35	4.5e-277	-0.0155003	0.162215	Triglycerides to total lipids ratio in very large VLDL
TG	2424.72	34	0	2536.04	35	0	0.0164832	0.220051	Total cholesterol in very small VLDL
TG	1097.81	34	1.37e-208	1103.93	35	4.05e-209	0.00380144	0.666063	Total cholesterol to total lipids ratio in very small VLDL
TG	2170.9	34	0	2270.55	35	0	0.0155541	0.220076	Cholesterol esters in very small VLDL
TG	1375.13	34	3.03e-267	1377.08	35	7.49e-267	0.00216005	0.827587	Cholesteryl esters to total lipids ratio in very small VLDL
TG	2856.74	34	0	2974.97	35	0	0.0170119	0.243742	Free cholesterol in very small VLDL
TG	941.563	34	1e-175	969.982	35	5.86e-181	0.00814888	0.318203	Free cholesterol to total lipids ratio in very small VLDL
TG	2630.9	34	0	2727.3	35	0	0.0153656	0.272172	Total lipids in very small VLDL
TG	2625.57	34	0	2713.69	35	0	0.0147038	0.292948	Concentration of very small VLDL particles
TG	2756.77	34	0	2884.33	35	0	0.0178095	0.218296	Phospholipids in very small VLDL
TG	1402.43	34	4.9e-273	1455.11	35	2.12e-283	0.0113343	0.266341	Phospholipids to total lipids ratio in very small VLDL
TG	1778.24	34	0	1790.56	35	0	0.00554119	0.630574	Triglycerides in very small VLDL
TG	1093.09	34	1.36e-207	1118	35	4.4e-212	-0.00783179	0.384933	Triglycerides to total lipids ratio in very small VLDL
TG	418.141	34	1.1e-67	463.575	35	2.88e-76	-0.0106604	0.063011	Total cholesterol levels in chylomicrons and extremely large VLDL
TG	600.129	34	1.05e-104	630.323	35	2.78e-110	-0.00869297	0.199676	Cholesteryl ester levels in chylomicrons and extremely large VLDL
TG	286.249	34	1.16e-41	351.329	35	7.2e-54	-0.0127516	0.00878855	Free cholesterol levels in chylomicrons and extremely large VLDL
TG	753.964	34	1.58e-136	754.126	35	6.94e-136	-0.000675308	0.932399	Free cholesterol to total lipids ratio in chylomicrons and extremely large VLDL
TG	436.947	34	1.82e-71	512.496	35	3.56e-86	-0.0137392	0.0207906	Total lipid levels in chylomicrons and extremely large VLDL
TG	454.015	34	6.6e-75	531.2	35	5.57e-90	-0.0138874	0.0218034	Concentration of chylomicrons and extremely large VLDL particles
TG	368.371	34	9.37e-58	439.972	35	1.63e-71	-0.0133727	0.0146987	Phospholipid levels in chylomicrons and extremely large VLDL
TG	545.775	34	1.47e-93	548.921	35	1.36e-93	-0.00296818	0.660776	Phospholipids to total lipids ratio in chylomicrons and extremely large VLDL
TG	504.096	34	4.66e-85	589.397	35	7.1e-102	-0.0145942	0.0220882	Triglyceride levels in chylomicrons and extremely large VLDL
TG	2346.71	34	0	2380.36	35	0	-0.00963041	0.489765	Triglycerides to total lipids ratio in chylomicrons and extremely large VLDL

## Sheet: HDL-C step1 sensitivity
Exposure	Q(MRegger)	Q_df(MRegger)	Q_pval(MRegger)	Q(IVW)	Q_df(IVW)	Q_pval(IVW)	egger_intercept	egger_intercept_p	Mediation
HDL-C	851.758	320	6.8e-50	893.219	321	2.11e-55	0.00287716	9.74e-05	Acetone levels
HDL-C	1284.9	320	1.22e-115	1299	321	1.21e-117	-0.00165532	0.0618579	Alanine levels
HDL-C	1433.46	320	2.34e-140	1456.88	321	5.38e-144	-0.0021052	0.0228988	Apolipoprotein A-I levels
HDL-C	6040.01	320	0	6109.51	321	0	0.00366774	0.0558797	Apolipoprotein B levels
HDL-C	3760.69	320	0	3877.27	321	0	0.00477533	0.0017894	Ratio of apolipoprotein B to apolipoprotein A1 levels
HDL-C	1775.34	319	3.2e-200	1777.85	320	2.69e-200	0.000989134	0.501799	Diacylglycerol levels
HDL-C	5430.13	320	0	5431.03	321	0	-0.000416672	0.818167	Docosahexaenoic acid (22:6) levels
HDL-C	3642.15	320	0	3663.01	321	0	-0.00197738	0.176663	Ratio of 22:6 docosahexaenoic acid to total fatty acids
HDL-C	5800.07	320	0	5808.39	321	0	0.00126985	0.498525	Esterified cholesterol levels
HDL-C	1746.95	318	1.55e-195	1755.32	319	1.18e-196	-0.00179188	0.217862	Estimated description of fatty acid chain length not actual carbon number
HDL-C	6025.43	320	0	6049.77	321	0	-0.00214964	0.256444	Ratio of omega-3 fatty acids to total fatty acids
HDL-C	2022.69	320	1.45e-244	2025.65	321	1.05e-244	0.000776124	0.494021	Ratio of omega-6 fatty acids to total fatty acids
HDL-C	5862.51	320	0	5863.36	321	0	0.000403043	0.830061	Free cholesterol levels
HDL-C	390.709	318	0.00331699	392.353	319	0.00313622	0.00106759	0.248325	Glycerol levels
HDL-C	1739.34	320	1.92e-193	1753.85	321	1.19e-195	0.00173726	0.10329	Glycoprotein acetylation
HDL-C	2042.87	320	2.91e-248	2082.7	321	3.59e-255	-0.00276857	0.0130016	Total cholesterol in HDL3
HDL-C	2002.15	320	8.31e-241	2208.17	321	2.28e-278	-0.00627081	2.22e-08	Mean diameter of HDL particles
HDL-C	5105.77	320	0	5127.07	321	0	0.00199913	0.248764	Cholesteryl esters to total lipids ratio in IDL
HDL-C	6514.24	320	0	6514.26	321	0	5.1e-05	0.979456	Free cholesterol in IDL
HDL-C	3543.01	320	0	3566.72	321	0	-0.00211131	0.144354	Free cholesterol to total lipids ratio in IDL
HDL-C	3667.44	320	0	3669.54	321	0	0.000627228	0.668676	Phospholipids to total lipids ratio in IDL
HDL-C	8497.58	320	0	8509.35	321	0	-0.00151078	0.506125	Triglycerides in IDL
HDL-C	6243.88	320	0	6275.46	321	0	-0.00245563	0.204226	Triglycerides to total lipids ratio in IDL
HDL-C	1397.45	320	2.72e-134	1398.35	321	4.03e-134	-0.000417077	0.65159	Isoleucine levels
HDL-C	4029.62	320	0	4080.09	321	0	0.00305978	0.0461506	Ratio of 18:2 linoleic acid to total fatty acids
HDL-C	1046.1	320	6.01e-78	1062.55	321	3.48e-80	-0.00178158	0.0255506	Leucine levels
HDL-C	1598.56	320	1.08e-168	1696.57	321	1.65e-185	-0.00437531	1.3e-05	Total cholesterol to total lipids ratio in large HDL
HDL-C	1865.26	320	5.75e-216	1940.32	321	3.74e-229	-0.00383216	0.000384541	Cholesteryl esters to total lipids ratio in large HDL
HDL-C	1183.57	320	2.7e-99	1255.84	321	1.31e-110	-0.00374022	1.35e-05	Free cholesterol to total lipids ratio in large HDL
HDL-C	2934.66	320	0	3062.65	321	0	0.00503586	0.000221541	Phospholipids to total lipids ratio in large HDL
HDL-C	5451.99	320	0	5606.97	321	0	-0.00544725	0.00276596	Triglycerides in large HDL
HDL-C	4261.63	320	0	4264.4	321	0	0.000740372	0.648889	Triglycerides to total lipids ratio in large HDL
HDL-C	6598.59	320	0	6603.59	321	0	0.000981377	0.623037	Free cholesterol in large LDL
HDL-C	4436.47	320	0	4528.45	321	0	-0.00416768	0.0104495	Free cholesterol to total lipids ratio in large LDL
HDL-C	4049.26	320	0	4166.47	321	0	0.00479289	0.00253248	Total Cholesterol in large VLDL
HDL-C	2463.65	320	0	2464.86	321	0	-0.000504352	0.692167	Total cholesterol to total lipids ratio in large VLDL
HDL-C	4008.47	320	0	4137.96	321	0	0.00503809	0.00143658	Cholesterol esters in large VLDL
HDL-C	2140.37	320	3.23e-266	2142.59	321	3.25e-266	-0.000680328	0.564996	Cholesteryl esters to total lipids ratio in large VLDL
HDL-C	4009.54	320	0	4105.96	321	0	0.00434294	0.00586221	Free cholesterol in large VLDL
HDL-C	3871.14	320	0	3994.25	321	0	0.00491273	0.00156284	Total lipids in large VLDL
HDL-C	3840.37	320	0	3964.46	321	0	0.00493199	0.00143526	Concentration of large VLDL particles
HDL-C	3960.26	320	0	4077.44	321	0	0.00479336	0.00227133	Phospholipids in large VLDL
HDL-C	2553.83	320	0	2559.16	321	0	-0.00109868	0.41432	Phospholipids to total lipids ratio in large VLDL
HDL-C	3755.59	320	0	3881.45	321	0	0.00496839	0.00117344	Triglycerides in large VLDL
HDL-C	2021.03	320	2.93e-244	2024.27	321	1.88e-244	-0.000789537	0.474003	Total cholesterol levels in medium HDL
HDL-C	4159.07	320	0	4163.19	321	0	-0.000880014	0.574174	Total cholesterol to total lipids ratio in medium HDL
HDL-C	2169.56	320	1.27e-271	2171.95	321	1.2e-271	-0.00067818	0.553154	Cholesterol esters in medium HDL
HDL-C	5506.97	320	0	5507.94	321	0	-0.000427547	0.813027	Cholesteryl esters to total lipids ratio in medium HDL
HDL-C	1814.28	320	8.29e-207	1821.26	321	1.11e-207	-0.00115597	0.267875	Free cholesterol in medium HDL
HDL-C	1216.15	320	1.69e-104	1235.97	321	2.14e-107	-0.00193993	0.0230186	Free cholesterol to total lipids ratio in medium HDL
HDL-C	2237.68	320	2.79e-284	2239.55	321	3.31e-284	-0.000599233	0.605342	Total lipids in medium HDL
HDL-C	2346.46	320	1.26e-304	2347.56	321	2.11e-304	-0.000459883	0.698073	Concentration of medium HDL particles
HDL-C	2332.71	320	4.78e-302	2337.25	321	1.81e-302	-0.000933785	0.430175	Phospholipids in medium HDL
HDL-C	3514.01	320	0	3539.44	321	0	-0.00219014	0.129126	Phospholipids to total lipids ratio in medium HDL
HDL-C	5635.32	320	0	5668.83	321	0	0.00255941	0.16867	Triglycerides in medium HDL
HDL-C	3640.69	320	0	3683.25	321	0	0.00286456	0.053989	Triglycerides to total lipids ratio in medium HDL
HDL-C	5403.2	320	0	5434.37	321	0	-0.00243619	0.175207	Free cholesterol to total lipids ratio in medium LDL
HDL-C	5007.35	320	0	5046.8	321	0	0.00278835	0.113337	Monounsaturated fatty acids (16:1, 18:1) levels
HDL-C	3154.29	320	0	3184.93	321	0	0.00242585	0.0788032	Ratio of monounsaturated fatty acids to total fatty acids
HDL-C	4731.34	320	0	4856.78	321	0	0.0049499	0.0038348	Total cholesterol in medium VLDL
HDL-C	3770.4	320	0	3817.6	321	0	-0.00298888	0.0461877	Total cholesterol to total lipids ratio in medium VLDL
HDL-C	4791.68	320	0	4905.56	321	0	0.00471523	0.00615401	Cholesterol esters in medium VLDL
HDL-C	3452.04	320	0	3497.61	321	0	-0.0029429	0.0406658	Cholesteryl esters to total lipids ratio in medium VLDL
HDL-C	4583.84	320	0	4713.34	321	0	0.00503407	0.00284996	Free cholesterol in medium VLDL
HDL-C	5551.96	320	0	5553.79	321	0	-0.000586683	0.745776	Free cholesterol to total lipids ratio in medium VLDL
HDL-C	4184.58	320	0	4347.49	321	0	0.00565054	0.000477257	Total lipids in medium VLDL
HDL-C	4104.98	320	0	4271.69	321	0	0.00571787	0.000362027	Concentration of medium VLDL particles
HDL-C	4278.68	320	0	4435.14	321	0	0.0055383	0.000705677	Phospholipids in medium VLDL
HDL-C	3021.4	320	0	3115.91	321	0	-0.00422953	0.00170737	Phospholipids to total lipids ratio in medium VLDL
HDL-C	3887.18	320	0	4065.71	321	0	0.00591842	0.000152022	Triglycerides in medium VLDL
HDL-C	3802.54	320	0	3858.84	321	0	0.00326714	0.0302473	Triglycerides to total lipids ratio in medium VLDL
HDL-C	4292.08	320	0	4294.49	321	0	-0.000679171	0.671899	Phosphatidylcholine and other choline levels
HDL-C	2165.78	320	6.38e-271	2165.91	321	1.57e-270	0.000157359	0.889274	Ratio of polyunsaturated fatty acids to total fatty acids
HDL-C	5766.61	320	0	5807.9	321	0	0.00281912	0.131088	Remnant cholesterol (non-HDL, non-LDL -cholesterol)
HDL-C	5925.06	320	0	5931.46	321	0	0.00111001	0.556923	Serum total cholesterol levels
HDL-C	5118.28	320	0	5192.91	321	0	0.00382161	0.0315008	Serum total triglyceride levels
HDL-C	2681.24	320	0	2701.16	321	0	0.00195959	0.1241	Total cholesterol levels in small HDL
HDL-C	4680.59	320	0	4687.71	321	0	0.00116255	0.485936	Total cholesterol to total lipids ratio in small HDL
HDL-C	3040.97	320	0	3065.45	321	0	0.00217426	0.109441	Cholesterol esters in small HDL
HDL-C	4769.55	320	0	4779.27	321	0	0.00135964	0.419909	Cholesteryl esters to total lipids ratio in small HDL
HDL-C	3542.59	320	0	3545.47	321	0	0.00074019	0.610384	Free cholesterol in small HDL
HDL-C	2932.55	320	0	2960.15	321	0	-0.00225173	0.083609	Free cholesterol to total lipids ratio in small HDL
HDL-C	4835.07	320	0	4853.41	321	0	0.00189613	0.271502	Triglycerides in small HDL
HDL-C	4498.16	320	0	4501.79	321	0	0.000833849	0.61154	Triglycerides to total lipids ratio in small HDL
HDL-C	5265.99	320	0	5295.22	321	0	-0.0023803	0.183544	Free cholesterol to total lipids ratio in small LDL
HDL-C	6539.84	320	0	6541.17	321	0	0.000509428	0.798987	Triglycerides in small LDL
HDL-C	6240.22	320	0	6258.23	321	0	-0.00186437	0.337324	Triglycerides to total lipids ratio in small LDL
HDL-C	3143.18	320	0	3145.06	321	0	-0.000619157	0.661542	Sphingomyelins levels
HDL-C	5124.24	320	0	5199.68	321	0	0.00379591	0.0307048	Total cholesterol in small VLDL
HDL-C	3952.38	320	0	3993.98	321	0	-0.00281922	0.0674036	Total cholesterol to total lipids ratio in small VLDL
HDL-C	4743.17	320	0	4804.93	321	0	0.0034318	0.0420447	Cholesterol esters in small VLDL
HDL-C	4198.95	320	0	4225.87	321	0	-0.00227167	0.152958	Cholesteryl esters to total lipids ratio in small VLDL
HDL-C	5720.48	320	0	5807.9	321	0	0.00409361	0.0277172	Free cholesterol in small VLDL
HDL-C	3145.45	320	0	3268.3	321	0	-0.00478905	0.000467562	Free cholesterol to total lipids ratio in small VLDL
HDL-C	5163	320	0	5287.42	321	0	0.0049047	0.00581008	Total lipids in small VLDL
HDL-C	5074.6	320	0	5203.84	321	0	0.00500514	0.00458734	Concentration of small VLDL particles
HDL-C	5433.84	320	0	5538.95	321	0	0.00450855	0.0133563	Phospholipids in small VLDL
HDL-C	3274.33	320	0	3370.7	321	0	-0.00430113	0.00233269	Phospholipids to total lipids ratio in small VLDL
HDL-C	4808.06	320	0	4953.94	321	0	0.00534478	0.00199986	Triglycerides in small VLDL
HDL-C	4046.38	320	0	4125.39	321	0	0.00389422	0.0129304	Triglycerides to total lipids ratio in small VLDL
HDL-C	3185.7	320	0	3268.2	321	0	0.00403371	0.0042614	Ratio of triglycerides to phosphoglycerides
HDL-C	3999.61	320	0	4001.67	321	0	-0.000630966	0.685419	Total cholines levels
HDL-C	4308	320	0	4308.35	321	0	-0.000259779	0.872444	Total phosphoglycerides levels
HDL-C	6249.84	320	0	6283.02	321	0	-0.00257637	0.193375	Estimated degree of unsaturation
HDL-C	5042.2	320	0	5116.72	321	0	0.00379019	0.0303838	Total cholesterol levels in VLDL
HDL-C	3836.23	320	0	4012.75	321	0	0.00587251	0.000149898	Mean diameter of VLDL particles
HDL-C	4218.25	320	0	4356.86	321	0	0.00521366	0.00130902	Triglyceride levels in VLDL
HDL-C	2083.05	320	1.21e-255	2169.72	321	3.11e-271	-0.0040662	0.000307612	Total cholesterol levels in very large HDL
HDL-C	2156.92	320	2.8e-269	2255.12	321	4.15e-287	0.00439569	0.000162186	Total cholesterol to total lipids ratio in very large HDL
HDL-C	2061.55	320	1.09e-251	2139.92	321	1.01e-265	-0.00386218	0.000554934	Cholesterol esters in very large HDL
HDL-C	1825.54	320	7.94e-209	1915.55	321	1.16e-224	0.0042018	8.81e-05	Cholesteryl esters to total lipids ratio in very large HDL
HDL-C	2045.41	320	9.97e-249	2143.98	321	1.8e-266	-0.00435275	0.00010544	Free cholesterol in very large HDL
HDL-C	2227.75	320	1.97e-282	2368.4	321	2.58e-308	-0.00520836	9.74e-06	Total lipids in very large HDL
HDL-C	2282	320	1.49e-292	2430.72	321	0	-0.0053548	7.08e-06	Concentration of very large HDL particles
HDL-C	2068.6	320	5.5e-253	2253.7	321	7.65e-287	-0.00597043	1.67e-07	Phospholipids in very large HDL
HDL-C	1724.25	320	9.11e-191	1826.83	321	1.12e-208	-0.00442316	1.73e-05	Phospholipids to total lipids ratio in very large HDL
HDL-C	6073.29	320	0	6105.75	321	0	-0.00250449	0.191897	Triglycerides in very large HDL
HDL-C	3290.46	320	0	3312.49	321	0	0.0020872	0.144288	Triglycerides to total lipids ratio in very large HDL
HDL-C	3443.31	320	0	3523.94	321	0	0.00396815	0.00653924	Total cholesterol in very large VLDL
HDL-C	1719.67	320	5.88e-190	1724.85	321	1.65e-190	-0.00110227	0.326915	Total cholesterol to total lipids ratio in very large VLDL
HDL-C	3412.22	320	0	3503.53	321	0	0.00422781	0.00367739	Cholesterol esters in very large VLDL
HDL-C	3422	320	0	3493.44	321	0	0.00373401	0.0101869	Free cholesterol in very large VLDL
HDL-C	1227.35	320	2.67e-106	1231.14	321	1.29e-106	-0.000934501	0.321113	Free cholesterol to total lipids ratio in very large VLDL
HDL-C	3445.1	320	0	3528.55	321	0	0.00404173	0.00568911	Total lipids in very large VLDL
HDL-C	3426.15	320	0	3509.18	321	0	0.00403242	0.00567609	Concentration of very large VLDL particles
HDL-C	3461.09	320	0	3540.29	321	0	0.00393679	0.00717515	Phospholipids in very large VLDL
HDL-C	1525.79	320	4.19e-156	1526.62	321	6.6e-156	0.000442523	0.676971	Phospholipids to total lipids ratio in very large VLDL
HDL-C	3422.76	320	0	3506.36	321	0	0.00404578	0.00549244	Triglycerides in very large VLDL
HDL-C	1940.74	320	1.28e-229	1943.76	321	8.89e-230	0.000840769	0.480813	Triglycerides to total lipids ratio in very large VLDL
HDL-C	3645.61	320	0	3671.59	321	0	-0.00219058	0.13199	Total cholesterol to total lipids ratio in very small VLDL
HDL-C	3309.13	320	0	3322.84	321	0	-0.00160112	0.250324	Cholesteryl esters to total lipids ratio in very small VLDL
HDL-C	1657.89	320	4.6e-179	1681.98	321	6.13e-183	-0.00210174	0.0318113	Free cholesterol to total lipids ratio in very small VLDL
HDL-C	6373.57	320	0	6377.67	321	0	0.00088562	0.650044	Total lipids in very small VLDL
HDL-C	6504.3	320	0	6509.92	321	0	0.0010366	0.59945	Concentration of very small VLDL particles
HDL-C	3671.17	320	0	3684.12	321	0	-0.00157223	0.288837	Phospholipids to total lipids ratio in very small VLDL
HDL-C	6686.63	320	0	6718.23	321	0	0.00247908	0.219707	Triglycerides in very small VLDL
HDL-C	5391.61	320	0	5427.4	321	0	0.00262648	0.145997	Triglycerides to total lipids ratio in very small VLDL
HDL-C	3638.08	320	0	3702.84	321	0	0.00355712	0.0175813	Total cholesterol levels in chylomicrons and extremely large VLDL
HDL-C	3273.3	320	0	3276.34	321	0	-0.000784808	0.585685	Total cholesterol to total lipids ratio in chylomicrons and extremely large VLDL
HDL-C	3801.09	320	0	3870.21	321	0	0.00367592	0.0164136	Cholesteryl ester levels in chylomicrons and extremely large VLDL
HDL-C	3393.55	320	0	3445.42	321	0	0.00318098	0.0276996	Free cholesterol levels in chylomicrons and extremely large VLDL
HDL-C	3234.61	320	0	3309.92	321	0	0.00383407	0.00669323	Total lipid levels in chylomicrons and extremely large VLDL
HDL-C	3196.08	320	0	3271.93	321	0	0.00384854	0.00619077	Concentration of chylomicrons and extremely large VLDL particles
HDL-C	3411.4	320	0	3485.73	321	0	0.00380899	0.00868355	Phospholipid levels in chylomicrons and extremely large VLDL
HDL-C	3089.18	320	0	3168.65	321	0	0.00394356	0.00438967	Triglyceride levels in chylomicrons and extremely large VLDL
