# Supplementary material for: Causal Inference of Metabolic Syndrome on Calcific Aortic Valve Stenosis: Linkage Disequilibrium Score Regression and Two-Sample, Two-Step Mendelian Randomization Analysis
Source: Research Square preprint supplement (doi:10.21203/rs.3.rs-7141693/v1), 2025-08-22
Supplement: Supplementary file 6 [file fac7271fe1c334fa25a19466.xlsx]

## Sheet: 处理过
Study accession	Reported trait	Author	Journal	Title
GCST90301941	Acetate levels	Karjalainen MK	Nature	Genome-wide characterization of circulating…
GCST90301942	Acetone levels	Karjalainen MK	Nature	Genome-wide characterization of circulating…
GCST90301943	Alanine levels	Karjalainen MK	Nature	Genome-wide characterization of circulating…
GCST90301944	Albumin levels	Karjalainen MK	Nature	Genome-wide characterization of circulating…
GCST90301945	Apolipoprotein A-I levels	Karjalainen MK	Nature	Genome-wide characterization of circulating…
GCST90301946	Apolipoprotein B levels	Karjalainen MK	Nature	Genome-wide characterization of circulating…
GCST90301947	Ratio of apolipoprotein B to apolipoprotein A1 levels	Karjalainen MK	Nature	Genome-wide characterization of circulating…
GCST90301948	3-Hydroxybutyrate levels	Karjalainen MK	Nature	Genome-wide characterization of circulating…
GCST90301949	Citrate levels	Karjalainen MK	Nature	Genome-wide characterization of circulating…
GCST90301950	Conjugated linoleic acid	Karjalainen MK	Nature	Genome-wide characterization of circulating…
GCST90301951	Ratio of conjugated linoleic acid to total fatty acids	Karjalainen MK	Nature	Genome-wide characterization of circulating…
GCST90301952	Creatinine levels	Karjalainen MK	Nature	Genome-wide characterization of circulating…
GCST90301953	Diacylglycerol levels	Karjalainen MK	Nature	Genome-wide characterization of circulating…
GCST90301954	Ratio of diacylglycerol to triglycerides	Karjalainen MK	Nature	Genome-wide characterization of circulating…
GCST90301955	Docosahexaenoic acid (22:6) levels	Karjalainen MK	Nature	Genome-wide characterization of circulating…
GCST90301956	Ratio of 22:6 docosahexaenoic acid to total fatty acids	Karjalainen MK	Nature	Genome-wide characterization of circulating…
GCST90301957	Esterified cholesterol levels	Karjalainen MK	Nature	Genome-wide characterization of circulating…
GCST90301958	Estimated description of fatty acid chain length not actual carbon number	Karjalainen MK	Nature	Genome-wide characterization of circulating…
GCST90301959	Omega-3 fatty acids levels	Karjalainen MK	Nature	Genome-wide characterization of circulating…
GCST90301960	Ratio of omega-3 fatty acids to total fatty acids	Karjalainen MK	Nature	Genome-wide characterization of circulating…
GCST90301961	Omega-6 fatty acids levels	Karjalainen MK	Nature	Genome-wide characterization of circulating…
GCST90301962	Ratio of omega-6 fatty acids to total fatty acids	Karjalainen MK	Nature	Genome-wide characterization of circulating…
GCST90301963	Free cholesterol levels	Karjalainen MK	Nature	Genome-wide characterization of circulating…
GCST90301964	Glucose levels	Karjalainen MK	Nature	Genome-wide characterization of circulating…
GCST90301965	Glutamine levels	Karjalainen MK	Nature	Genome-wide characterization of circulating…
GCST90301966	Glycerol levels	Karjalainen MK	Nature	Genome-wide characterization of circulating…
GCST90301967	Glycine levels	Karjalainen MK	Nature	Genome-wide characterization of circulating…
GCST90301968	Glycoprotein acetylation	Karjalainen MK	Nature	Genome-wide characterization of circulating…
GCST90301969	Total cholesterol in HDL2	Karjalainen MK	Nature	Genome-wide characterization of circulating…
GCST90301970	Total cholesterol in HDL3	Karjalainen MK	Nature	Genome-wide characterization of circulating…
GCST90301971	Total cholesterol levels in HDL	Karjalainen MK	Nature	Genome-wide characterization of circulating…
GCST90301972	Mean diameter of HDL particles	Karjalainen MK	Nature	Genome-wide characterization of circulating…
GCST90301973	Triglyceride levels in HDL	Karjalainen MK	Nature	Genome-wide characterization of circulating…
GCST90301974	Histidine levels	Karjalainen MK	Nature	Genome-wide characterization of circulating…
GCST90301975	Total Cholesterol in IDL	Karjalainen MK	Nature	Genome-wide characterization of circulating…
GCST90301976	Cholesteryl esters to total lipids ratio in IDL	Karjalainen MK	Nature	Genome-wide characterization of circulating…
GCST90301977	Cholesterol esters in IDL	Karjalainen MK	Nature	Genome-wide characterization of circulating…
GCST90301978	Cholesteryl esters to total lipids ratio in IDL	Karjalainen MK	Nature	Genome-wide characterization of circulating…
GCST90301979	Free cholesterol in IDL	Karjalainen MK	Nature	Genome-wide characterization of circulating…
GCST90301980	Free cholesterol to total lipids ratio in IDL	Karjalainen MK	Nature	Genome-wide characterization of circulating…
GCST90301981	Total lipids in IDL	Karjalainen MK	Nature	Genome-wide characterization of circulating…
GCST90301982	Concentration of IDL particles	Karjalainen MK	Nature	Genome-wide characterization of circulating…
GCST90301983	Phospholipids in IDL	Karjalainen MK	Nature	Genome-wide characterization of circulating…
GCST90301984	Phospholipids to total lipids ratio in IDL	Karjalainen MK	Nature	Genome-wide characterization of circulating…
GCST90301985	Triglycerides in IDL	Karjalainen MK	Nature	Genome-wide characterization of circulating…
GCST90301986	Triglycerides to total lipids ratio in IDL	Karjalainen MK	Nature	Genome-wide characterization of circulating…
GCST90301987	Isoleucine levels	Karjalainen MK	Nature	Genome-wide characterization of circulating…
GCST90301988	Linoleic acid (18:2) levels	Karjalainen MK	Nature	Genome-wide characterization of circulating…
GCST90301989	Ratio of 18:2 linoleic acid to total fatty acids	Karjalainen MK	Nature	Genome-wide characterization of circulating…
GCST90301990	Lactate levels	Karjalainen MK	Nature	Genome-wide characterization of circulating…
GCST90301991	Total cholesterol levels in LDL	Karjalainen MK	Nature	Genome-wide characterization of circulating…
GCST90301992	Mean diameter of LDL particles	Karjalainen MK	Nature	Genome-wide characterization of circulating…
GCST90301993	Triglyceride levels in LDL	Karjalainen MK	Nature	Genome-wide characterization of circulating…
GCST90301994	Leucine levels	Karjalainen MK	Nature	Genome-wide characterization of circulating…
GCST90301995	Total cholesterol in large HDL	Karjalainen MK	Nature	Genome-wide characterization of circulating…
GCST90301996	Total cholesterol to total lipids ratio in large HDL	Karjalainen MK	Nature	Genome-wide characterization of circulating…
GCST90301997	Cholesterol esters in large HDL	Karjalainen MK	Nature	Genome-wide characterization of circulating…
GCST90301998	Cholesteryl esters to total lipids ratio in large HDL	Karjalainen MK	Nature	Genome-wide characterization of circulating…
GCST90301999	Free cholesterol in large HDL	Karjalainen MK	Nature	Genome-wide characterization of circulating…
GCST90302000	Free cholesterol to total lipids ratio in large HDL	Karjalainen MK	Nature	Genome-wide characterization of circulating…
GCST90302001	Total lipids in large HDL	Karjalainen MK	Nature	Genome-wide characterization of circulating…
GCST90302002	Concentration of large HDL particles	Karjalainen MK	Nature	Genome-wide characterization of circulating…
GCST90302003	Phospholipids in large HDL	Karjalainen MK	Nature	Genome-wide characterization of circulating…
GCST90302004	Phospholipids to total lipids ratio in large HDL	Karjalainen MK	Nature	Genome-wide characterization of circulating…
GCST90302005	Triglycerides in large HDL	Karjalainen MK	Nature	Genome-wide characterization of circulating…
GCST90302006	Triglycerides to total lipids ratio in large HDL	Karjalainen MK	Nature	Genome-wide characterization of circulating…
GCST90302007	Total cholesterol in large LDL	Karjalainen MK	Nature	Genome-wide characterization of circulating…
GCST90302008	Total cholesterol to total lipids ratio in large LDL	Karjalainen MK	Nature	Genome-wide characterization of circulating…
GCST90302009	Cholesterol esters in large LDL	Karjalainen MK	Nature	Genome-wide characterization of circulating…
GCST90302010	Cholesteryl esters to total lipids ratio in large LDL	Karjalainen MK	Nature	Genome-wide characterization of circulating…
GCST90302011	Free cholesterol in large LDL	Karjalainen MK	Nature	Genome-wide characterization of circulating…
GCST90302012	Free cholesterol to total lipids ratio in large LDL	Karjalainen MK	Nature	Genome-wide characterization of circulating…
GCST90302013	Total lipids in large LDL	Karjalainen MK	Nature	Genome-wide characterization of circulating…
GCST90302014	Concentration of large LDL particles	Karjalainen MK	Nature	Genome-wide characterization of circulating…
GCST90302015	Phospholipids in large LDL	Karjalainen MK	Nature	Genome-wide characterization of circulating…
GCST90302016	Phospholipids to total lipids ratio in large LDL	Karjalainen MK	Nature	Genome-wide characterization of circulating…
GCST90302017	Triglycerides in large LDL	Karjalainen MK	Nature	Genome-wide characterization of circulating…
GCST90302018	Triglycerides to total lipids ratio in large LDL	Karjalainen MK	Nature	Genome-wide characterization of circulating…
GCST90302019	Total Cholesterol in large VLDL	Karjalainen MK	Nature	Genome-wide characterization of circulating…
GCST90302020	Total cholesterol to total lipids ratio in large VLDL	Karjalainen MK	Nature	Genome-wide characterization of circulating…
GCST90302021	Cholesterol esters in large VLDL	Karjalainen MK	Nature	Genome-wide characterization of circulating…
GCST90302022	Cholesteryl esters to total lipids ratio in large VLDL	Karjalainen MK	Nature	Genome-wide characterization of circulating…
GCST90302023	Free cholesterol in large VLDL	Karjalainen MK	Nature	Genome-wide characterization of circulating…
GCST90302024	Free cholesterol to total lipids ratio in large VLDL	Karjalainen MK	Nature	Genome-wide characterization of circulating…
GCST90302025	Total lipids in large VLDL	Karjalainen MK	Nature	Genome-wide characterization of circulating…
GCST90302026	Concentration of large VLDL particles	Karjalainen MK	Nature	Genome-wide characterization of circulating…
GCST90302027	Phospholipids in large VLDL	Karjalainen MK	Nature	Genome-wide characterization of circulating…
GCST90302028	Phospholipids to total lipids ratio in large VLDL	Karjalainen MK	Nature	Genome-wide characterization of circulating…
GCST90302029	Triglycerides in large VLDL	Karjalainen MK	Nature	Genome-wide characterization of circulating…
GCST90302030	Triglycerides to total lipids ratio in large VLDL	Karjalainen MK	Nature	Genome-wide characterization of circulating…
GCST90302031	Total cholesterol levels in medium HDL	Karjalainen MK	Nature	Genome-wide characterization of circulating…
GCST90302032	Total cholesterol to total lipids ratio in medium HDL	Karjalainen MK	Nature	Genome-wide characterization of circulating…
GCST90302033	Cholesterol esters in medium HDL	Karjalainen MK	Nature	Genome-wide characterization of circulating…
GCST90302034	Cholesteryl esters to total lipids ratio in medium HDL	Karjalainen MK	Nature	Genome-wide characterization of circulating…
GCST90302035	Free cholesterol in medium HDL	Karjalainen MK	Nature	Genome-wide characterization of circulating…
GCST90302036	Free cholesterol to total lipids ratio in medium HDL	Karjalainen MK	Nature	Genome-wide characterization of circulating…
GCST90302037	Total lipids in medium HDL	Karjalainen MK	Nature	Genome-wide characterization of circulating…
GCST90302038	Concentration of medium HDL particles	Karjalainen MK	Nature	Genome-wide characterization of circulating…
GCST90302039	Phospholipids in medium HDL	Karjalainen MK	Nature	Genome-wide characterization of circulating…
GCST90302040	Phospholipids to total lipids ratio in medium HDL	Karjalainen MK	Nature	Genome-wide characterization of circulating…
GCST90302041	Triglycerides in medium HDL	Karjalainen MK	Nature	Genome-wide characterization of circulating…
GCST90302042	Triglycerides to total lipids ratio in medium HDL	Karjalainen MK	Nature	Genome-wide characterization of circulating…
GCST90302043	Total cholesterol in medium LDL	Karjalainen MK	Nature	Genome-wide characterization of circulating…
GCST90302044	Total cholesterol to total lipids ratio in medium LDL	Karjalainen MK	Nature	Genome-wide characterization of circulating…
GCST90302045	Cholesterol esters in medium LDL	Karjalainen MK	Nature	Genome-wide characterization of circulating…
GCST90302046	Cholesteryl esters to total lipids ratio in medium LDL	Karjalainen MK	Nature	Genome-wide characterization of circulating…
GCST90302047	Free cholesterol in medium LDL	Karjalainen MK	Nature	Genome-wide characterization of circulating…
GCST90302048	Free cholesterol to total lipids ratio in medium LDL	Karjalainen MK	Nature	Genome-wide characterization of circulating…
GCST90302049	Total lipid levels in medium LDL	Karjalainen MK	Nature	Genome-wide characterization of circulating…
GCST90302050	Concentration of medium LDL particles	Karjalainen MK	Nature	Genome-wide characterization of circulating…
GCST90302051	Phospholipids in medium LDL	Karjalainen MK	Nature	Genome-wide characterization of circulating…
GCST90302052	Phospholipids to total lipids ratio in medium LDL	Karjalainen MK	Nature	Genome-wide characterization of circulating…
GCST90302053	Triglycerides in medium LDL	Karjalainen MK	Nature	Genome-wide characterization of circulating…
GCST90302054	Triglycerides to total lipids ratio in medium LDL	Karjalainen MK	Nature	Genome-wide characterization of circulating…
GCST90302055	Monounsaturated fatty acids (16:1, 18:1) levels	Karjalainen MK	Nature	Genome-wide characterization of circulating…
GCST90302056	Ratio of monounsaturated fatty acids to total fatty acids	Karjalainen MK	Nature	Genome-wide characterization of circulating…
GCST90302057	Total cholesterol in medium VLDL	Karjalainen MK	Nature	Genome-wide characterization of circulating…
GCST90302058	Total cholesterol to total lipids ratio in medium VLDL	Karjalainen MK	Nature	Genome-wide characterization of circulating…
GCST90302059	Cholesterol esters in medium VLDL	Karjalainen MK	Nature	Genome-wide characterization of circulating…
GCST90302060	Cholesteryl esters to total lipids ratio in medium VLDL	Karjalainen MK	Nature	Genome-wide characterization of circulating…
GCST90302061	Free cholesterol in medium VLDL	Karjalainen MK	Nature	Genome-wide characterization of circulating…
GCST90302062	Free cholesterol to total lipids ratio in medium VLDL	Karjalainen MK	Nature	Genome-wide characterization of circulating…
GCST90302063	Total lipids in medium VLDL	Karjalainen MK	Nature	Genome-wide characterization of circulating…
GCST90302064	Concentration of medium VLDL particles	Karjalainen MK	Nature	Genome-wide characterization of circulating…
GCST90302065	Phospholipids in medium VLDL	Karjalainen MK	Nature	Genome-wide characterization of circulating…
GCST90302066	Phospholipids to total lipids ratio in medium VLDL	Karjalainen MK	Nature	Genome-wide characterization of circulating…
GCST90302067	Triglycerides in medium VLDL	Karjalainen MK	Nature	Genome-wide characterization of circulating…
GCST90302068	Triglycerides to total lipids ratio in medium VLDL	Karjalainen MK	Nature	Genome-wide characterization of circulating…
GCST90302069	Phosphatidylcholine and other choline levels	Karjalainen MK	Nature	Genome-wide characterization of circulating…
GCST90302070	Phenylalanine levels	Karjalainen MK	Nature	Genome-wide characterization of circulating…
GCST90302071	Polyunsaturated fatty acids	Karjalainen MK	Nature	Genome-wide characterization of circulating…
GCST90302072	Ratio of polyunsaturated fatty acids to total fatty acids	Karjalainen MK	Nature	Genome-wide characterization of circulating…
GCST90302073	Pyruvate levels	Karjalainen MK	Nature	Genome-wide characterization of circulating…
GCST90302074	Remnant cholesterol (non-HDL, non-LDL -cholesterol)	Karjalainen MK	Nature	Genome-wide characterization of circulating…
GCST90302075	Serum total cholesterol levels	Karjalainen MK	Nature	Genome-wide characterization of circulating…
GCST90302076	Serum total triglyceride levels	Karjalainen MK	Nature	Genome-wide characterization of circulating…
GCST90302077	Saturated fatty acids	Karjalainen MK	Nature	Genome-wide characterization of circulating…
GCST90302078	Ratio of saturated fatty acids to total fatty acids	Karjalainen MK	Nature	Genome-wide characterization of circulating…
GCST90302079	Total cholesterol levels in small HDL	Karjalainen MK	Nature	Genome-wide characterization of circulating…
GCST90302080	Total cholesterol to total lipids ratio in small HDL	Karjalainen MK	Nature	Genome-wide characterization of circulating…
GCST90302081	Cholesterol esters in small HDL	Karjalainen MK	Nature	Genome-wide characterization of circulating…
GCST90302082	Cholesteryl esters to total lipids ratio in small HDL	Karjalainen MK	Nature	Genome-wide characterization of circulating…
GCST90302083	Free cholesterol in small HDL	Karjalainen MK	Nature	Genome-wide characterization of circulating…
GCST90302084	Free cholesterol to total lipids ratio in small HDL	Karjalainen MK	Nature	Genome-wide characterization of circulating…
GCST90302085	Total lipids in small HDL	Karjalainen MK	Nature	Genome-wide characterization of circulating…
GCST90302086	Concentration of small HDL particles	Karjalainen MK	Nature	Genome-wide characterization of circulating…
GCST90302087	Phospholipids in small HDL	Karjalainen MK	Nature	Genome-wide characterization of circulating…
GCST90302088	Phospholipids to total lipids ratio in small HDL	Karjalainen MK	Nature	Genome-wide characterization of circulating…
GCST90302089	Triglycerides in small HDL	Karjalainen MK	Nature	Genome-wide characterization of circulating…
GCST90302090	Triglycerides to total lipids ratio in small HDL	Karjalainen MK	Nature	Genome-wide characterization of circulating…
GCST90302091	Total Cholesterol in small LDL	Karjalainen MK	Nature	Genome-wide characterization of circulating…
GCST90302092	Total cholesterol to total lipids ratio in small LDL	Karjalainen MK	Nature	Genome-wide characterization of circulating…
GCST90302093	Cholesterol esters in small LDL	Karjalainen MK	Nature	Genome-wide characterization of circulating…
GCST90302094	Cholesteryl esters to total lipids ratio in small LDL	Karjalainen MK	Nature	Genome-wide characterization of circulating…
GCST90302095	Free cholesterol in small LDL	Karjalainen MK	Nature	Genome-wide characterization of circulating…
GCST90302096	Free cholesterol to total lipids ratio in small LDL	Karjalainen MK	Nature	Genome-wide characterization of circulating…
GCST90302097	Total lipids in small LDL	Karjalainen MK	Nature	Genome-wide characterization of circulating…
GCST90302098	Concentration of small LDL particles	Karjalainen MK	Nature	Genome-wide characterization of circulating…
GCST90302099	Phospholipids in small LDL	Karjalainen MK	Nature	Genome-wide characterization of circulating…
GCST90302100	Phospholipids to total lipids ratio in small LDL	Karjalainen MK	Nature	Genome-wide characterization of circulating…
GCST90302101	Triglycerides in small LDL	Karjalainen MK	Nature	Genome-wide characterization of circulating…
GCST90302102	Triglycerides to total lipids ratio in small LDL	Karjalainen MK	Nature	Genome-wide characterization of circulating…
GCST90302103	Sphingomyelins levels	Karjalainen MK	Nature	Genome-wide characterization of circulating…
GCST90302104	Total cholesterol in small VLDL	Karjalainen MK	Nature	Genome-wide characterization of circulating…
GCST90302105	Total cholesterol to total lipids ratio in small VLDL	Karjalainen MK	Nature	Genome-wide characterization of circulating…
GCST90302106	Cholesterol esters in small VLDL	Karjalainen MK	Nature	Genome-wide characterization of circulating…
GCST90302107	Cholesteryl esters to total lipids ratio in small VLDL	Karjalainen MK	Nature	Genome-wide characterization of circulating…
GCST90302108	Free cholesterol in small VLDL	Karjalainen MK	Nature	Genome-wide characterization of circulating…
GCST90302109	Free cholesterol to total lipids ratio in small VLDL	Karjalainen MK	Nature	Genome-wide characterization of circulating…
GCST90302110	Total lipids in small VLDL	Karjalainen MK	Nature	Genome-wide characterization of circulating…
GCST90302111	Concentration of small VLDL particles	Karjalainen MK	Nature	Genome-wide characterization of circulating…
GCST90302112	Phospholipids in small VLDL	Karjalainen MK	Nature	Genome-wide characterization of circulating…
GCST90302113	Phospholipids to total lipids ratio in small VLDL	Karjalainen MK	Nature	Genome-wide characterization of circulating…
GCST90302114	Triglycerides in small VLDL	Karjalainen MK	Nature	Genome-wide characterization of circulating…
GCST90302115	Triglycerides to total lipids ratio in small VLDL	Karjalainen MK	Nature	Genome-wide characterization of circulating…
GCST90302116	Ratio of triglycerides to phosphoglycerides	Karjalainen MK	Nature	Genome-wide characterization of circulating…
GCST90302117	Total cholines levels	Karjalainen MK	Nature	Genome-wide characterization of circulating…
GCST90302118	Total fatty acids	Karjalainen MK	Nature	Genome-wide characterization of circulating…
GCST90302119	Total phosphoglycerides levels	Karjalainen MK	Nature	Genome-wide characterization of circulating…
GCST90302120	Tyrosine levels	Karjalainen MK	Nature	Genome-wide characterization of circulating…
GCST90302121	Estimated degree of unsaturation	Karjalainen MK	Nature	Genome-wide characterization of circulating…
GCST90302122	Valine levels	Karjalainen MK	Nature	Genome-wide characterization of circulating…
GCST90302123	Total cholesterol levels in VLDL	Karjalainen MK	Nature	Genome-wide characterization of circulating…
GCST90302124	Mean diameter of VLDL particles	Karjalainen MK	Nature	Genome-wide characterization of circulating…
GCST90302125	Triglyceride levels in VLDL	Karjalainen MK	Nature	Genome-wide characterization of circulating…
GCST90302126	Total cholesterol levels in very large HDL	Karjalainen MK	Nature	Genome-wide characterization of circulating…
GCST90302127	Total cholesterol to total lipids ratio in very large HDL	Karjalainen MK	Nature	Genome-wide characterization of circulating…
GCST90302128	Cholesterol esters in very large HDL	Karjalainen MK	Nature	Genome-wide characterization of circulating…
GCST90302129	Cholesteryl esters to total lipids ratio in very large HDL	Karjalainen MK	Nature	Genome-wide characterization of circulating…
GCST90302130	Free cholesterol in very large HDL	Karjalainen MK	Nature	Genome-wide characterization of circulating…
GCST90302131	Free cholesterol to total lipids ratio in very large HDL	Karjalainen MK	Nature	Genome-wide characterization of circulating…
GCST90302132	Total lipids in very large HDL	Karjalainen MK	Nature	Genome-wide characterization of circulating…
GCST90302133	Concentration of very large HDL particles	Karjalainen MK	Nature	Genome-wide characterization of circulating…
GCST90302134	Phospholipids in very large HDL	Karjalainen MK	Nature	Genome-wide characterization of circulating…
GCST90302135	Phospholipids to total lipids ratio in very large HDL	Karjalainen MK	Nature	Genome-wide characterization of circulating…
GCST90302136	Triglycerides in very large HDL	Karjalainen MK	Nature	Genome-wide characterization of circulating…
GCST90302137	Triglycerides to total lipids ratio in very large HDL	Karjalainen MK	Nature	Genome-wide characterization of circulating…
GCST90302138	Total cholesterol in very large VLDL	Karjalainen MK	Nature	Genome-wide characterization of circulating…
GCST90302139	Total cholesterol to total lipids ratio in very large VLDL	Karjalainen MK	Nature	Genome-wide characterization of circulating…
GCST90302140	Cholesterol esters in very large VLDL	Karjalainen MK	Nature	Genome-wide characterization of circulating…
GCST90302141	Cholesteryl esters to total lipids ratio in very large VLDL	Karjalainen MK	Nature	Genome-wide characterization of circulating…
GCST90302142	Free cholesterol in very large VLDL	Karjalainen MK	Nature	Genome-wide characterization of circulating…
GCST90302143	Free cholesterol to total lipids ratio in very large VLDL	Karjalainen MK	Nature	Genome-wide characterization of circulating…
GCST90302144	Total lipids in very large VLDL	Karjalainen MK	Nature	Genome-wide characterization of circulating…
GCST90302145	Concentration of very large VLDL particles	Karjalainen MK	Nature	Genome-wide characterization of circulating…
GCST90302146	Phospholipids in very large VLDL	Karjalainen MK	Nature	Genome-wide characterization of circulating…
GCST90302147	Phospholipids to total lipids ratio in very large VLDL	Karjalainen MK	Nature	Genome-wide characterization of circulating…
GCST90302148	Triglycerides in very large VLDL	Karjalainen MK	Nature	Genome-wide characterization of circulating…
GCST90302149	Triglycerides to total lipids ratio in very large VLDL	Karjalainen MK	Nature	Genome-wide characterization of circulating…
GCST90302150	Total cholesterol in very small VLDL	Karjalainen MK	Nature	Genome-wide characterization of circulating…
GCST90302151	Total cholesterol to total lipids ratio in very small VLDL	Karjalainen MK	Nature	Genome-wide characterization of circulating…
GCST90302152	Cholesterol esters in very small VLDL	Karjalainen MK	Nature	Genome-wide characterization of circulating…
GCST90302153	Cholesteryl esters to total lipids ratio in very small VLDL	Karjalainen MK	Nature	Genome-wide characterization of circulating…
GCST90302154	Free cholesterol in very small VLDL	Karjalainen MK	Nature	Genome-wide characterization of circulating…
GCST90302155	Free cholesterol to total lipids ratio in very small VLDL	Karjalainen MK	Nature	Genome-wide characterization of circulating…
GCST90302156	Total lipids in very small VLDL	Karjalainen MK	Nature	Genome-wide characterization of circulating…
GCST90302157	Concentration of very small VLDL particles	Karjalainen MK	Nature	Genome-wide characterization of circulating…
GCST90302158	Phospholipids in very small VLDL	Karjalainen MK	Nature	Genome-wide characterization of circulating…
GCST90302159	Phospholipids to total lipids ratio in very small VLDL	Karjalainen MK	Nature	Genome-wide characterization of circulating…
GCST90302160	Triglycerides in very small VLDL	Karjalainen MK	Nature	Genome-wide characterization of circulating…
GCST90302161	Triglycerides to total lipids ratio in very small VLDL	Karjalainen MK	Nature	Genome-wide characterization of circulating…
GCST90302162	Total cholesterol levels in chylomicrons and extremely large VLDL	Karjalainen MK	Nature	Genome-wide characterization of circulating…
GCST90302163	Total cholesterol to total lipids ratio in chylomicrons and extremely large VLDL	Karjalainen MK	Nature	Genome-wide characterization of circulating…
GCST90302164	Cholesteryl ester levels in chylomicrons and extremely large VLDL	Karjalainen MK	Nature	Genome-wide characterization of circulating…
GCST90302165	Cholesteryl esters to total lipids ratio in chylomicrons and extremely large VLDL	Karjalainen MK	Nature	Genome-wide characterization of circulating…
GCST90302166	Free cholesterol levels in chylomicrons and extremely large VLDL	Karjalainen MK	Nature	Genome-wide characterization of circulating…
GCST90302167	Free cholesterol to total lipids ratio in chylomicrons and extremely large VLDL	Karjalainen MK	Nature	Genome-wide characterization of circulating…
GCST90302168	Total lipid levels in chylomicrons and extremely large VLDL	Karjalainen MK	Nature	Genome-wide characterization of circulating…
GCST90302169	Concentration of chylomicrons and extremely large VLDL particles	Karjalainen MK	Nature	Genome-wide characterization of circulating…
GCST90302170	Phospholipid levels in chylomicrons and extremely large VLDL	Karjalainen MK	Nature	Genome-wide characterization of circulating…
GCST90302171	Phospholipids to total lipids ratio in chylomicrons and extremely large VLDL	Karjalainen MK	Nature	Genome-wide characterization of circulating…
GCST90302172	Triglyceride levels in chylomicrons and extremely large VLDL	Karjalainen MK	Nature	Genome-wide characterization of circulating…
GCST90302173	Triglycerides to total lipids ratio in chylomicrons and extremely large VLDL	Karjalainen MK	Nature	Genome-wide characterization of circulating…

## Sheet: original
Karjalainen MK	GCST90302128	2024-03-06	Nature	Genome-wide characterization of circulating…	Cholesterol esters in very large HDL	esterified cholesterol measurement, high density lipoprotein cholesterol measurement	-	• 4435 East Asian		47	FTP Download
								• 11340 South Asian
								• 120241 European
Karjalainen MK	GCST90302129	2024-03-06	Nature	Genome-wide characterization of circulating…	Cholesteryl esters to total lipids ratio in very large HDL	cholesteryl esters:total lipids ratio, high density lipoprotein cholesterol measurement	-	• 4435 East Asian		29	FTP Download
								• 11340 South Asian
								• 120241 European
Karjalainen MK	GCST90302130	2024-03-06	Nature	Genome-wide characterization of circulating…	Free cholesterol in very large HDL	free cholesterol in very large HDL measurement	-	• 4435 East Asian		63	FTP Download
								• 11340 South Asian
								• 120241 European
Karjalainen MK	GCST90302131	2024-03-06	Nature	Genome-wide characterization of circulating…	Free cholesterol to total lipids ratio in very large HDL	free cholesterol:total lipids ratio, high density lipoprotein cholesterol measurement	-	• 4435 East Asian		31	FTP Download
								• 11340 South Asian
								• 120241 European
Karjalainen MK	GCST90302132	2024-03-06	Nature	Genome-wide characterization of circulating…	Total lipids in very large HDL	total lipids in very large HDL measurement	-	• 4435 East Asian		63	FTP Download
								• 11340 South Asian
								• 120241 European
Karjalainen MK	GCST90302133	2024-03-06	Nature	Genome-wide characterization of circulating…	Concentration of very large HDL particles	high density lipoprotein cholesterol measurement	-	• 4435 East Asian		64	FTP Download
								• 11340 South Asian
								• 120241 European
Karjalainen MK	GCST90302134	2024-03-06	Nature	Genome-wide characterization of circulating…	Phospholipids in very large HDL	phospholipids in very large HDL measurement	-	• 4435 East Asian		65	FTP Download
								• 11340 South Asian
								• 120241 European
Karjalainen MK	GCST90302135	2024-03-06	Nature	Genome-wide characterization of circulating…	Phospholipids to total lipids ratio in very large HDL	phospholipids:total lipids ratio, high density lipoprotein cholesterol measurement	-	• 4435 East Asian		36	FTP Download
								• 11340 South Asian
								• 120241 European
Karjalainen MK	GCST90302136	2024-03-06	Nature	Genome-wide characterization of circulating…	Triglycerides in very large HDL	triglycerides in very large HDL measurement	-	• 4435 East Asian		34	FTP Download
								• 11340 South Asian
								• 120241 European
Karjalainen MK	GCST90302137	2024-03-06	Nature	Genome-wide characterization of circulating…	Triglycerides to total lipids ratio in very large HDL	triglycerides:total lipids ratio, high density lipoprotein cholesterol measurement	-	• 4435 East Asian		35	FTP Download
								• 11340 South Asian
								• 120241 European
Karjalainen MK	GCST90302138	2024-03-06	Nature	Genome-wide characterization of circulating…	Total cholesterol in very large VLDL	total cholesterol measurement, very low density lipoprotein cholesterol measurement	-	• 4435 East Asian		32	FTP Download
								• 11340 South Asian
								• 120241 European
Karjalainen MK	GCST90302139	2024-03-06	Nature	Genome-wide characterization of circulating…	Total cholesterol to total lipids ratio in very large VLDL	very low density lipoprotein cholesterol measurement, cholesterol:total lipids ratio	-	• 4435 East Asian		20	FTP Download
								• 11340 South Asian
								• 110896 European
Karjalainen MK	GCST90302140	2024-03-06	Nature	Genome-wide characterization of circulating…	Cholesterol esters in very large VLDL	very low density lipoprotein cholesterol measurement, esterified cholesterol measurement	-	• 4435 East Asian		34	FTP Download
								• 11340 South Asian
								• 120241 European
Karjalainen MK	GCST90302141	2024-03-06	Nature	Genome-wide characterization of circulating…	Cholesteryl esters to total lipids ratio in very large VLDL	very low density lipoprotein cholesterol measurement, cholesteryl esters:total lipids ratio	-	• 4435 East Asian		14	FTP Download
								• 11340 South Asian
								• 110896 European
Karjalainen MK	GCST90302142	2024-03-06	Nature	Genome-wide characterization of circulating…	Free cholesterol in very large VLDL	free cholesterol in very large VLDL measurement	-	• 4435 East Asian		32	FTP Download
								• 11340 South Asian
								• 120241 European
Karjalainen MK	GCST90302143	2024-03-06	Nature	Genome-wide characterization of circulating…	Free cholesterol to total lipids ratio in very large VLDL	very low density lipoprotein cholesterol measurement, free cholesterol:total lipids ratio	-	• 4435 East Asian		19	FTP Download
								• 11340 South Asian
								• 110896 European
Karjalainen MK	GCST90302144	2024-03-06	Nature	Genome-wide characterization of circulating…	Total lipids in very large VLDL	total lipids in very large VLDL measurement	-	• 4435 East Asian		32	FTP Download
								• 11340 South Asian
								• 120241 European
Karjalainen MK	GCST90302145	2024-03-06	Nature	Genome-wide characterization of circulating…	Concentration of very large VLDL particles	very low density lipoprotein cholesterol measurement	-	• 4435 East Asian		32	FTP Download
								• 11340 South Asian
								• 120241 European
Karjalainen MK	GCST90302146	2024-03-06	Nature	Genome-wide characterization of circulating…	Phospholipids in very large VLDL	phospholipids in VLDL measurement	-	• 4435 East Asian		33	FTP Download
								• 11340 South Asian
								• 120241 European
Karjalainen MK	GCST90302147	2024-03-06	Nature	Genome-wide characterization of circulating…	Phospholipids to total lipids ratio in very large VLDL	very low density lipoprotein cholesterol measurement, phospholipids:total lipids ratio	-	• 4435 East Asian		18	FTP Download
								• 11340 South Asian
								• 110896 European
Karjalainen MK	GCST90302148	2024-03-06	Nature	Genome-wide characterization of circulating…	Triglycerides in very large VLDL	triglycerides in very large VLDL measurement	-	• 4435 East Asian		34	FTP Download
								• 11340 South Asian
								• 120241 European
Karjalainen MK	GCST90302149	2024-03-06	Nature	Genome-wide characterization of circulating…	Triglycerides to total lipids ratio in very large VLDL	triglycerides:total lipids ratio, very low density lipoprotein cholesterol measurement	-	• 4435 East Asian		23	FTP Download
								• 11340 South Asian
								• 110896 European
Karjalainen MK	GCST90302150	2024-03-06	Nature	Genome-wide characterization of circulating…	Total cholesterol in very small VLDL	cholesterol in very small VLDL measurement	-	• 4435 East Asian		45	FTP Download
								• 11340 South Asian
								• 120241 European
Karjalainen MK	GCST90302151	2024-03-06	Nature	Genome-wide characterization of circulating…	Total cholesterol to total lipids ratio in very small VLDL	very low density lipoprotein cholesterol measurement, cholesterol:total lipids ratio	-	• 4435 East Asian		28	FTP Download
								• 11340 South Asian
								• 120241 European
Karjalainen MK	GCST90302152	2024-03-06	Nature	Genome-wide characterization of circulating…	Cholesterol esters in very small VLDL	very low density lipoprotein cholesterol measurement, esterified cholesterol measurement	-	• 4435 East Asian		38	FTP Download
								• 11340 South Asian
								• 120241 European
Karjalainen MK	GCST90302153	2024-03-06	Nature	Genome-wide characterization of circulating…	Cholesteryl esters to total lipids ratio in very small VLDL	very low density lipoprotein cholesterol measurement, cholesteryl esters:total lipids ratio	-	• 4435 East Asian		23	FTP Download
								• 11340 South Asian
								• 120241 European
Karjalainen MK	GCST90302154	2024-03-06	Nature	Genome-wide characterization of circulating…	Free cholesterol in very small VLDL	free cholesterol in very small VLDL measurement	-	• 4435 East Asian		49	FTP Download
								• 11340 South Asian
								• 120241 European
Karjalainen MK	GCST90302155	2024-03-06	Nature	Genome-wide characterization of circulating…	Free cholesterol to total lipids ratio in very small VLDL	very low density lipoprotein cholesterol measurement, free cholesterol:total lipids ratio	-	• 4435 East Asian		28	FTP Download
								• 11340 South Asian
								• 120241 European
Karjalainen MK	GCST90302156	2024-03-06	Nature	Genome-wide characterization of circulating…	Total lipids in very small VLDL	total lipids in very small VLDL measurement	-	• 4435 East Asian		55	FTP Download
								• 11340 South Asian
								• 120241 European
Karjalainen MK	GCST90302157	2024-03-06	Nature	Genome-wide characterization of circulating…	Concentration of very small VLDL particles	very low density lipoprotein cholesterol measurement	-	• 4435 East Asian		56	FTP Download
								• 11340 South Asian
								• 120241 European
Karjalainen MK	GCST90302158	2024-03-06	Nature	Genome-wide characterization of circulating…	Phospholipids in very small VLDL	phospholipids in VLDL measurement	-	• 4435 East Asian		55	FTP Download
								• 11340 South Asian
								• 120241 European
Karjalainen MK	GCST90302159	2024-03-06	Nature	Genome-wide characterization of circulating…	Phospholipids to total lipids ratio in very small VLDL	very low density lipoprotein cholesterol measurement, phospholipids:total lipids ratio	-	• 4435 East Asian		32	FTP Download
								• 11340 South Asian
								• 120241 European
Karjalainen MK	GCST90302160	2024-03-06	Nature	Genome-wide characterization of circulating…	Triglycerides in very small VLDL	triglycerides in very small VLDL measurement	-	• 4435 East Asian		57	FTP Download
								• 11340 South Asian
								• 120241 European
Karjalainen MK	GCST90302161	2024-03-06	Nature	Genome-wide characterization of circulating…	Triglycerides to total lipids ratio in very small VLDL	triglycerides:total lipids ratio, very low density lipoprotein cholesterol measurement	-	• 4435 East Asian		42	FTP Download
								• 11340 South Asian
								• 120241 European
Karjalainen MK	GCST90302162	2024-03-06	Nature	Genome-wide characterization of circulating…	Total cholesterol levels in chylomicrons and extremely large VLDL	chylomicron measurement, total cholesterol measurement, very low density lipoprotein cholesterol measurement	-	• 4435 East Asian		38	FTP Download
								• 11340 South Asian
								• 120241 European
Karjalainen MK	GCST90302163	2024-03-06	Nature	Genome-wide characterization of circulating…	Total cholesterol to total lipids ratio in chylomicrons and extremely large VLDL	chylomicron measurement, very low density lipoprotein cholesterol measurement, cholesterol:total lipids ratio	-	• 4435 East Asian		21	FTP Download
								• 11340 South Asian
								• 120241 European
Karjalainen MK	GCST90302164	2024-03-06	Nature	Genome-wide characterization of circulating…	Cholesteryl ester levels in chylomicrons and extremely large VLDL	cholesteryl ester measurement, chylomicron measurement, very low density lipoprotein cholesterol measurement	-	• 4435 East Asian		38	FTP Download
								• 11340 South Asian
								• 120241 European
Karjalainen MK	GCST90302165	2024-03-06	Nature	Genome-wide characterization of circulating…	Cholesteryl esters to total lipids ratio in chylomicrons and extremely large VLDL	chylomicron measurement, very low density lipoprotein cholesterol measurement, cholesteryl esters:total lipids ratio	-	• 4435 East Asian		19	FTP Download
								• 11340 South Asian
								• 110896 European
Karjalainen MK	GCST90302166	2024-03-06	Nature	Genome-wide characterization of circulating…	Free cholesterol levels in chylomicrons and extremely large VLDL	free cholesterol measurement, chylomicron measurement, very low density lipoprotein cholesterol measurement	-	• 4435 East Asian		32	FTP Download
								• 11340 South Asian
								• 120241 European
Karjalainen MK	GCST90302167	2024-03-06	Nature	Genome-wide characterization of circulating…	Free cholesterol to total lipids ratio in chylomicrons and extremely large VLDL	chylomicron measurement, very low density lipoprotein cholesterol measurement, free cholesterol:total lipids ratio	-	• 4435 East Asian		17	FTP Download
								• 11340 South Asian
								• 110896 European
Karjalainen MK	GCST90302168	2024-03-06	Nature	Genome-wide characterization of circulating…	Total lipid levels in chylomicrons and extremely large VLDL	chylomicron measurement, very low density lipoprotein cholesterol measurement, lipid measurement	-	• 4435 East Asian		33	FTP Download
								• 11340 South Asian
								• 120241 European
Karjalainen MK	GCST90302169	2024-03-06	Nature	Genome-wide characterization of circulating…	Concentration of chylomicrons and extremely large VLDL particles	chylomicron measurement, very low density lipoprotein cholesterol measurement	-	• 4435 East Asian		33	FTP Download
								• 11340 South Asian
								• 120241 European
Karjalainen MK	GCST90302170	2024-03-06	Nature	Genome-wide characterization of circulating…	Phospholipid levels in chylomicrons and extremely large VLDL	chylomicron measurement, very low density lipoprotein cholesterol measurement, phospholipid measurement	-	• 4435 East Asian		36	FTP Download
								• 11340 South Asian
								• 120241 European
Karjalainen MK	GCST90302171	2024-03-06	Nature	Genome-wide characterization of circulating…	Phospholipids to total lipids ratio in chylomicrons and extremely large VLDL	chylomicron measurement, very low density lipoprotein cholesterol measurement, phospholipids:total lipids ratio	-	• 4435 East Asian		20	FTP Download
								• 11340 South Asian
								• 110896 European
Karjalainen MK	GCST90302172	2024-03-06	Nature	Genome-wide characterization of circulating…	Triglyceride levels in chylomicrons and extremely large VLDL	chylomicron measurement, triglyceride measurement, very low density lipoprotein cholesterol measurement	-	• 4435 East Asian		34	FTP Download
								• 11340 South Asian
								• 120241 European
Karjalainen MK	GCST90302173	2024-03-06	Nature	Genome-wide characterization of circulating…	Triglycerides to total lipids ratio in chylomicrons and extremely large VLDL	chylomicron measurement, triglycerides:total lipids ratio, very low density lipoprotein cholesterol measurement	-	• 4435 East Asian		18	FTP Download
								• 11340 South Asian
								• 110896 European
Karjalainen MK	GCST90301941	2024-03-06	Nature	Genome-wide characterization of circulating…	Acetate levels	acetate measurement	-	• 4435 East Asian		7	FTP Download
								• 11340 South Asian
								• 120241 European
Karjalainen MK	GCST90301942	2024-03-06	Nature	Genome-wide characterization of circulating…	Acetone levels	acetone measurement	-	• 4435 East Asian		10	FTP Download
								• 11340 South Asian
								• 114536 European
Karjalainen MK	GCST90301943	2024-03-06	Nature	Genome-wide characterization of circulating…	Alanine levels	alanine measurement	-	• 4435 East Asian		33	FTP Download
								• 11340 South Asian
								• 120241 European
Karjalainen MK	GCST90301944	2024-03-06	Nature	Genome-wide characterization of circulating…	Albumin levels	serum albumin measurement	-	• 4435 East Asian		11	FTP Download
								• 11340 South Asian
								• 120241 European
Karjalainen MK	GCST90301945	2024-03-06	Nature	Genome-wide characterization of circulating…	Apolipoprotein A-I levels	apolipoprotein A 1 measurement	-	• 4435 East Asian		48	FTP Download
								• 11340 South Asian
								• 120241 European
Karjalainen MK	GCST90301946	2024-03-06	Nature	Genome-wide characterization of circulating…	Apolipoprotein B levels	apolipoprotein B measurement	-	• 4435 East Asian		56	FTP Download
								• 11340 South Asian
								• 120241 European
Karjalainen MK	GCST90301947	2024-03-06	Nature	Genome-wide characterization of circulating…	Ratio of apolipoprotein B to apolipoprotein A1 levels	apolipoprotein A 1 measurement, apolipoprotein B measurement	-	• 4435 East Asian		59	FTP Download
								• 11340 South Asian
								• 120241 European
Karjalainen MK	GCST90301948	2024-03-06	Nature	Genome-wide characterization of circulating…	3-Hydroxybutyrate levels	3-hydroxybutyrate measurement	-	• 11340 South Asian		9	FTP Download
								• 72076 European
Karjalainen MK	GCST90301949	2024-03-06	Nature	Genome-wide characterization of circulating…	Citrate levels	citrate measurement	-	• 11340 South Asian		11	FTP Download
								• 72076 European
Karjalainen MK	GCST90301950	2024-03-06	Nature	Genome-wide characterization of circulating…	Conjugated linoleic acid	linoleic acid measurement	-	• 70413 European		9	FTP Download
Karjalainen MK	GCST90301951	2024-03-06	Nature	Genome-wide characterization of circulating…	Ratio of conjugated linoleic acid to total fatty acids	fatty acid measurement, linoleic acid measurement	-	• 70413 European		2	FTP Download
Karjalainen MK	GCST90301952	2024-03-06	Nature	Genome-wide characterization of circulating…	Creatinine levels	creatinine measurement	-	• 4435 East Asian		49	FTP Download
								• 11340 South Asian
								• 120241 European
Karjalainen MK	GCST90301953	2024-03-06	Nature	Genome-wide characterization of circulating…	Diacylglycerol levels	diglyceride measurement	-	• 74743 European		17	FTP Download
Karjalainen MK	GCST90301954	2024-03-06	Nature	Genome-wide characterization of circulating…	Ratio of diacylglycerol to triglycerides	triglyceride measurement, diglyceride measurement	-	• 74743 European		7	FTP Download
Karjalainen MK	GCST90301955	2024-03-06	Nature	Genome-wide characterization of circulating…	Docosahexaenoic acid (22:6) levels	docosahexaenoic acid measurement	-	• 4435 East Asian		32	FTP Download
								• 11340 South Asian
								• 120241 European
Karjalainen MK	GCST90301956	2024-03-06	Nature	Genome-wide characterization of circulating…	Ratio of 22:6 docosahexaenoic acid to total fatty acids	docosahexaenoic acid measurement, fatty acid measurement	-	• 4435 East Asian		12	FTP Download
								• 11340 South Asian
								• 120241 European
Karjalainen MK	GCST90301957	2024-03-06	Nature	Genome-wide characterization of circulating…	Esterified cholesterol levels	esterified cholesterol measurement	-	• 4435 East Asian		54	FTP Download
								• 11340 South Asian
								• 120241 European
Karjalainen MK	GCST90301958	2024-03-06	Nature	Genome-wide characterization of circulating…	Estimated description of fatty acid chain length not actual carbon number	fatty acid change measurement	-	• 74743 European		17	FTP Download
Karjalainen MK	GCST90301959	2024-03-06	Nature	Genome-wide characterization of circulating…	Omega-3 fatty acids levels	omega-3 polyunsaturated fatty acid measurement	-	• 4435 East Asian		31	FTP Download
								• 11340 South Asian
								• 120241 European
Karjalainen MK	GCST90301960	2024-03-06	Nature	Genome-wide characterization of circulating…	Ratio of omega-3 fatty acids to total fatty acids	fatty acid measurement	-	• 4435 East Asian		12	FTP Download
								• 11340 South Asian
								• 120241 European
Karjalainen MK	GCST90301961	2024-03-06	Nature	Genome-wide characterization of circulating…	Omega-6 fatty acids levels	omega-6 polyunsaturated fatty acid measurement	-	• 4435 East Asian		54	FTP Download
								• 11340 South Asian
								• 120241 European
Karjalainen MK	GCST90301962	2024-03-06	Nature	Genome-wide characterization of circulating…	Ratio of omega-6 fatty acids to total fatty acids	fatty acid measurement	-	• 4435 East Asian		23	FTP Download
								• 11340 South Asian
								• 110896 European
Karjalainen MK	GCST90301963	2024-03-06	Nature	Genome-wide characterization of circulating…	Free cholesterol levels	free cholesterol measurement	-	• 4435 East Asian		56	FTP Download
								• 11340 South Asian
								• 120241 European
Karjalainen MK	GCST90301964	2024-03-06	Nature	Genome-wide characterization of circulating…	Glucose levels	glucose measurement	-	• 4435 East Asian		17	FTP Download
								• 11340 South Asian
								• 120241 European
Karjalainen MK	GCST90301965	2024-03-06	Nature	Genome-wide characterization of circulating…	Glutamine levels	glutamine measurement	-	• 4435 East Asian		26	FTP Download
								• 11340 South Asian
								• 115911 European
Karjalainen MK	GCST90301966	2024-03-06	Nature	Genome-wide characterization of circulating…	Glycerol levels	glycerol measurement	-	• 11340 South Asian		2	FTP Download
								• 30718 European
Karjalainen MK	GCST90301967	2024-03-06	Nature	Genome-wide characterization of circulating…	Glycine levels	glycine measurement	-	• 11340 South Asian		22	FTP Download
								• 78883 European
Karjalainen MK	GCST90301968	2024-03-06	Nature	Genome-wide characterization of circulating…	Glycoprotein acetylation	glycoprotein measurement	-	• 4435 East Asian		25	FTP Download
								• 11340 South Asian
								• 113034 European
Karjalainen MK	GCST90301969	2024-03-06	Nature	Genome-wide characterization of circulating…	Total cholesterol in HDL2	total cholesterol measurement, high density lipoprotein cholesterol measurement	-	• 4435 East Asian		64	FTP Download
								• 11340 South Asian
								• 120241 European
Karjalainen MK	GCST90302078	2024-03-06	Nature	Genome-wide characterization of circulating…	Ratio of saturated fatty acids to total fatty acids	fatty acid measurement	-	• 4435 East Asian		14	FTP Download
								• 11340 South Asian
								• 120241 European
Karjalainen MK	GCST90302079	2024-03-06	Nature	Genome-wide characterization of circulating…	Total cholesterol levels in small HDL	total cholesterol measurement, high density lipoprotein cholesterol measurement	-	• 4435 East Asian		26	FTP Download
								• 11340 South Asian
								• 120241 European
Karjalainen MK	GCST90302080	2024-03-06	Nature	Genome-wide characterization of circulating…	Total cholesterol to total lipids ratio in small HDL	cholesterol:total lipids ratio, high density lipoprotein cholesterol measurement	-	• 4435 East Asian		44	FTP Download
								• 11340 South Asian
								• 120241 European
Karjalainen MK	GCST90302081	2024-03-06	Nature	Genome-wide characterization of circulating…	Cholesterol esters in small HDL	esterified cholesterol measurement, high density lipoprotein cholesterol measurement	-	• 4435 East Asian		28	FTP Download
								• 11340 South Asian
								• 120241 European
Karjalainen MK	GCST90302082	2024-03-06	Nature	Genome-wide characterization of circulating…	Cholesteryl esters to total lipids ratio in small HDL	cholesteryl esters:total lipids ratio, high density lipoprotein cholesterol measurement	-	• 4435 East Asian		41	FTP Download
								• 11340 South Asian
								• 120241 European
Karjalainen MK	GCST90302083	2024-03-06	Nature	Genome-wide characterization of circulating…	Free cholesterol in small HDL	free cholesterol in small HDL measurement	-	• 4435 East Asian		25	FTP Download
								• 11340 South Asian
								• 120241 European
Karjalainen MK	GCST90302085	2024-03-06	Nature	Genome-wide characterization of circulating…	Total lipids in small HDL	total lipids in small HDL measurement	-	• 4435 East Asian		21	FTP Download
								• 11340 South Asian
								• 120241 European
Karjalainen MK	GCST90302087	2024-03-06	Nature	Genome-wide characterization of circulating…	Phospholipids in small HDL	phospholipids in small HDL measurement	-	• 4435 East Asian		30	FTP Download
								• 11340 South Asian
								• 120241 European
Karjalainen MK	GCST90302088	2024-03-06	Nature	Genome-wide characterization of circulating…	Phospholipids to total lipids ratio in small HDL	phospholipids:total lipids ratio, high density lipoprotein cholesterol measurement	-	• 4435 East Asian		48	FTP Download
								• 11340 South Asian
								• 120241 European
Karjalainen MK	GCST90302089	2024-03-06	Nature	Genome-wide characterization of circulating…	Triglycerides in small HDL	triglycerides in small HDL measurement	-	• 4435 East Asian		44	FTP Download
								• 11340 South Asian
								• 120241 European
Karjalainen MK	GCST90302090	2024-03-06	Nature	Genome-wide characterization of circulating…	Triglycerides to total lipids ratio in small HDL	triglycerides:total lipids ratio, high density lipoprotein cholesterol measurement	-	• 4435 East Asian		44	FTP Download
								• 11340 South Asian
								• 120241 European
Karjalainen MK	GCST90302091	2024-03-06	Nature	Genome-wide characterization of circulating…	Total Cholesterol in small LDL	total cholesterol in small LDL	-	• 4435 East Asian		51	FTP Download
								• 11340 South Asian
								• 120241 European
Karjalainen MK	GCST90302092	2024-03-06	Nature	Genome-wide characterization of circulating…	Total cholesterol to total lipids ratio in small LDL	cholesterol:total lipids ratio, low density lipoprotein cholesterol measurement	-	• 4435 East Asian		50	FTP Download
								• 11340 South Asian
								• 120241 European
Karjalainen MK	GCST90302093	2024-03-06	Nature	Genome-wide characterization of circulating…	Cholesterol esters in small LDL	esterified cholesterol measurement, low density lipoprotein cholesterol measurement	-	• 4435 East Asian		50	FTP Download
								• 11340 South Asian
								• 120241 European
Karjalainen MK	GCST90302094	2024-03-06	Nature	Genome-wide characterization of circulating…	Cholesteryl esters to total lipids ratio in small LDL	cholesterol:total lipids ratio, cholesteryl esters:total lipids ratio	-	• 4435 East Asian		43	FTP Download
								• 11340 South Asian
								• 120241 European
Karjalainen MK	GCST90302096	2024-03-06	Nature	Genome-wide characterization of circulating…	Free cholesterol to total lipids ratio in small LDL	low density lipoprotein cholesterol measurement, free cholesterol:total lipids ratio	-	• 4435 East Asian		50	FTP Download
								• 11340 South Asian
								• 120241 European
Karjalainen MK	GCST90302097	2024-03-06	Nature	Genome-wide characterization of circulating…	Total lipids in small LDL	total lipids in small LDL	-	• 4435 East Asian		54	FTP Download
								• 11340 South Asian
								• 120241 European
Karjalainen MK	GCST90302099	2024-03-06	Nature	Genome-wide characterization of circulating…	Phospholipids in small LDL	phospholipids in small LDL measurement	-	• 4435 East Asian		52	FTP Download
								• 11340 South Asian
								• 120241 European
Karjalainen MK	GCST90302101	2024-03-06	Nature	Genome-wide characterization of circulating…	Triglycerides in small LDL	triglycerides in small LDL measurement	-	• 4435 East Asian		46	FTP Download
								• 11340 South Asian
								• 120241 European
Karjalainen MK	GCST90302102	2024-03-06	Nature	Genome-wide characterization of circulating…	Triglycerides to total lipids ratio in small LDL	triglycerides:total lipids ratio, low density lipoprotein cholesterol measurement	-	• 4435 East Asian		29	FTP Download
								• 11340 South Asian
								• 120241 European
Karjalainen MK	GCST90302052	2024-03-06	Nature	Genome-wide characterization of circulating…	Phospholipids to total lipids ratio in medium LDL	low density lipoprotein cholesterol measurement, phospholipids:total lipids ratio	-	• 4435 East Asian		45	FTP Download
								• 11340 South Asian
								• 120241 European
Karjalainen MK	GCST90302053	2024-03-06	Nature	Genome-wide characterization of circulating…	Triglycerides in medium LDL	triglycerides in medium LDL measurement	-	• 4435 East Asian		42	FTP Download
								• 11340 South Asian
								• 120241 European
Karjalainen MK	GCST90302054	2024-03-06	Nature	Genome-wide characterization of circulating…	Triglycerides to total lipids ratio in medium LDL	triglycerides:total lipids ratio, low density lipoprotein cholesterol measurement	-	• 4435 East Asian		23	FTP Download
								• 11340 South Asian
								• 120241 European
Karjalainen MK	GCST90302055	2024-03-06	Nature	Genome-wide characterization of circulating…	Monounsaturated fatty acids (16:1, 18:1) levels	fatty acid measurement	-	• 4435 East Asian		45	FTP Download
								• 11340 South Asian
								• 120241 European
Karjalainen MK	GCST90302056	2024-03-06	Nature	Genome-wide characterization of circulating…	Ratio of monounsaturated fatty acids to total fatty acids	fatty acid measurement	-	• 4435 East Asian		26	FTP Download
								• 11340 South Asian
								• 120241 European
Karjalainen MK	GCST90302057	2024-03-06	Nature	Genome-wide characterization of circulating…	Total cholesterol in medium VLDL	total cholesterol in medium VLDL	-	• 4435 East Asian		48	FTP Download
								• 11340 South Asian
								• 120241 European
Karjalainen MK	GCST90302058	2024-03-06	Nature	Genome-wide characterization of circulating…	Total cholesterol to total lipids ratio in medium VLDL	very low density lipoprotein cholesterol measurement, cholesterol:total lipids ratio	-	• 4435 East Asian		34	FTP Download
								• 11340 South Asian
								• 120241 European
Karjalainen MK	GCST90302059	2024-03-06	Nature	Genome-wide characterization of circulating…	Cholesterol esters in medium VLDL	cholesterol esters in medium VLDL measurement	-	• 4435 East Asian		49	FTP Download
								• 11340 South Asian
								• 120241 European
Karjalainen MK	GCST90302060	2024-03-06	Nature	Genome-wide characterization of circulating…	Cholesteryl esters to total lipids ratio in medium VLDL	very low density lipoprotein cholesterol measurement, cholesteryl esters:total lipids ratio	-	• 4435 East Asian		38	FTP Download
								• 11340 South Asian
								• 120241 European
Karjalainen MK	GCST90302061	2024-03-06	Nature	Genome-wide characterization of circulating…	Free cholesterol in medium VLDL	free cholesterol in medium VLDL measurement	-	• 4435 East Asian		46	FTP Download
								• 11340 South Asian
								• 120241 European
Karjalainen MK	GCST90302062	2024-03-06	Nature	Genome-wide characterization of circulating…	Free cholesterol to total lipids ratio in medium VLDL	very low density lipoprotein cholesterol measurement, free cholesterol:total lipids ratio	-	• 4435 East Asian		25	FTP Download
								• 11340 South Asian
								• 120241 European
Karjalainen MK	GCST90302063	2024-03-06	Nature	Genome-wide characterization of circulating…	Total lipids in medium VLDL	total lipids in medium VLDL	-	• 4435 East Asian		47	FTP Download
								• 11340 South Asian
								• 120241 European
Karjalainen MK	GCST90302064	2024-03-06	Nature	Genome-wide characterization of circulating…	Concentration of medium VLDL particles	very low density lipoprotein cholesterol measurement	-	• 4435 East Asian		47	FTP Download
								• 11340 South Asian
								• 120241 European
Karjalainen MK	GCST90302065	2024-03-06	Nature	Genome-wide characterization of circulating…	Phospholipids in medium VLDL	phospholipids in VLDL measurement	-	• 4435 East Asian		48	FTP Download
								• 11340 South Asian
								• 120241 European
Karjalainen MK	GCST90302066	2024-03-06	Nature	Genome-wide characterization of circulating…	Phospholipids to total lipids ratio in medium VLDL	very low density lipoprotein cholesterol measurement, phospholipids:total lipids ratio	-	• 4435 East Asian		30	FTP Download
								• 11340 South Asian
								• 120241 European
Karjalainen MK	GCST90302067	2024-03-06	Nature	Genome-wide characterization of circulating…	Triglycerides in medium VLDL	triglycerides in medium VLDL measurement	-	• 4435 East Asian		43	FTP Download
								• 11340 South Asian
								• 120241 European
Karjalainen MK	GCST90302068	2024-03-06	Nature	Genome-wide characterization of circulating…	Triglycerides to total lipids ratio in medium VLDL	triglycerides:total lipids ratio, very low density lipoprotein cholesterol measurement	-	• 4435 East Asian		34	FTP Download
								• 11340 South Asian
								• 120241 European
Karjalainen MK	GCST90302069	2024-03-06	Nature	Genome-wide characterization of circulating…	Phosphatidylcholine and other choline levels	choline measurement	-	• 4435 East Asian		46	FTP Download
								• 11340 South Asian
								• 120241 European
Karjalainen MK	GCST90302070	2024-03-06	Nature	Genome-wide characterization of circulating…	Phenylalanine levels	phenylalanine measurement	-	• 4435 East Asian		13	FTP Download
								• 11340 South Asian
								• 120241 European
Karjalainen MK	GCST90302071	2024-03-06	Nature	Genome-wide characterization of circulating…	Polyunsaturated fatty acids	polyunsaturated fatty acid measurement	-	• 4435 East Asian		55	FTP Download
								• 11340 South Asian
								• 120241 European
Karjalainen MK	GCST90302072	2024-03-06	Nature	Genome-wide characterization of circulating…	Ratio of polyunsaturated fatty acids to total fatty acids	fatty acid measurement	-	• 4435 East Asian		24	FTP Download
								• 11340 South Asian
								• 120241 European
Karjalainen MK	GCST90302074	2024-03-06	Nature	Genome-wide characterization of circulating…	Remnant cholesterol (non-HDL, non-LDL -cholesterol)	remnant cholesterol measurement	-	• 4435 East Asian		57	FTP Download
								• 11340 South Asian
								• 120241 European
Karjalainen MK	GCST90302075	2024-03-06	Nature	Genome-wide characterization of circulating…	Serum total cholesterol levels	total cholesterol measurement	-	• 4435 East Asian		55	FTP Download
								• 11340 South Asian
								• 120241 European
Karjalainen MK	GCST90302076	2024-03-06	Nature	Genome-wide characterization of circulating…	Serum total triglyceride levels	triglyceride measurement	-	• 4435 East Asian		51	FTP Download
								• 11340 South Asian
								• 120241 European
Karjalainen MK	GCST90302077	2024-03-06	Nature	Genome-wide characterization of circulating…	Saturated fatty acids	saturated fatty acids measurement	-	• 4435 East Asian		38	FTP Download
								• 11340 South Asian
								• 120241 European
Karjalainen MK	GCST90302084	2024-03-06	Nature	Genome-wide characterization of circulating…	Free cholesterol to total lipids ratio in small HDL	free cholesterol:total lipids ratio, high density lipoprotein cholesterol measurement	-	• 4435 East Asian		22	FTP Download
								• 11340 South Asian
								• 120241 European
Karjalainen MK	GCST90302086	2024-03-06	Nature	Genome-wide characterization of circulating…	Concentration of small HDL particles	high density lipoprotein cholesterol measurement	-	• 4435 East Asian		20	FTP Download
								• 11340 South Asian
								• 120241 European
Karjalainen MK	GCST90302095	2024-03-06	Nature	Genome-wide characterization of circulating…	Free cholesterol in small LDL	free cholesterol in small LDL measurement	-	• 4435 East Asian		55	FTP Download
								• 11340 South Asian
								• 120241 European
Karjalainen MK	GCST90302098	2024-03-06	Nature	Genome-wide characterization of circulating…	Concentration of small LDL particles	low density lipoprotein cholesterol measurement	-	• 4435 East Asian		54	FTP Download
								• 11340 South Asian
								• 120241 European
Karjalainen MK	GCST90302100	2024-03-06	Nature	Genome-wide characterization of circulating…	Phospholipids to total lipids ratio in small LDL	low density lipoprotein cholesterol measurement, phospholipids:total lipids ratio	-	• 4435 East Asian		48	FTP Download
								• 11340 South Asian
								• 120241 European
Karjalainen MK	GCST90302021	2024-03-06	Nature	Genome-wide characterization of circulating…	Cholesterol esters in large VLDL	cholesterol esters in large VLDL measurement	-	• 4435 East Asian		39	FTP Download
								• 11340 South Asian
								• 120241 European
Karjalainen MK	GCST90302022	2024-03-06	Nature	Genome-wide characterization of circulating…	Cholesteryl esters to total lipids ratio in large VLDL	very low density lipoprotein cholesterol measurement, cholesteryl esters:total lipids ratio	-	• 4435 East Asian		19	FTP Download
								• 11340 South Asian
								• 120241 European
Karjalainen MK	GCST90302023	2024-03-06	Nature	Genome-wide characterization of circulating…	Free cholesterol in large VLDL	free cholesterol in large VLDL measurement	-	• 4435 East Asian		37	FTP Download
								• 11340 South Asian
								• 120241 European
Karjalainen MK	GCST90302024	2024-03-06	Nature	Genome-wide characterization of circulating…	Free cholesterol to total lipids ratio in large VLDL	very low density lipoprotein cholesterol measurement, free cholesterol:total lipids ratio	-	• 4435 East Asian		15	FTP Download
								• 11340 South Asian
								• 110896 European
Karjalainen MK	GCST90302025	2024-03-06	Nature	Genome-wide characterization of circulating…	Total lipids in large VLDL	total lipids in large VLDL	-	• 4435 East Asian		41	FTP Download
								• 11340 South Asian
								• 120241 European
Karjalainen MK	GCST90302026	2024-03-06	Nature	Genome-wide characterization of circulating…	Concentration of large VLDL particles	very low density lipoprotein cholesterol measurement	-	• 4435 East Asian		41	FTP Download
								• 11340 South Asian
								• 120241 European
Karjalainen MK	GCST90302027	2024-03-06	Nature	Genome-wide characterization of circulating…	Phospholipids in large VLDL	phospholipids in VLDL measurement	-	• 4435 East Asian		41	FTP Download
								• 11340 South Asian
								• 120241 European
Karjalainen MK	GCST90302028	2024-03-06	Nature	Genome-wide characterization of circulating…	Phospholipids to total lipids ratio in large VLDL	very low density lipoprotein cholesterol measurement, phospholipids:total lipids ratio	-	• 4435 East Asian		24	FTP Download
								• 11340 South Asian
								• 110896 European
Karjalainen MK	GCST90302029	2024-03-06	Nature	Genome-wide characterization of circulating…	Triglycerides in large VLDL	triglycerides in large VLDL measurement	-	• 4435 East Asian		40	FTP Download
								• 11340 South Asian
								• 120241 European
Karjalainen MK	GCST90302030	2024-03-06	Nature	Genome-wide characterization of circulating…	Triglycerides to total lipids ratio in large VLDL	triglycerides:total lipids ratio, very low density lipoprotein cholesterol measurement	-	• 4435 East Asian		23	FTP Download
								• 11340 South Asian
								• 120241 European
Karjalainen MK	GCST90302031	2024-03-06	Nature	Genome-wide characterization of circulating…	Total cholesterol levels in medium HDL	total cholesterol measurement, high density lipoprotein cholesterol measurement	-	• 4435 East Asian		32	FTP Download
								• 11340 South Asian
								• 120241 European
Karjalainen MK	GCST90302032	2024-03-06	Nature	Genome-wide characterization of circulating…	Total cholesterol to total lipids ratio in medium HDL	esterified cholesterol measurement, high density lipoprotein cholesterol measurement	-	• 4435 East Asian		37	FTP Download
								• 11340 South Asian
								• 120241 European
Karjalainen MK	GCST90302033	2024-03-06	Nature	Genome-wide characterization of circulating…	Cholesterol esters in medium HDL	esterified cholesterol measurement, high density lipoprotein cholesterol measurement	-	• 4435 East Asian		32	FTP Download
								• 11340 South Asian
								• 120241 European
Karjalainen MK	GCST90302073	2024-03-06	Nature	Genome-wide characterization of circulating…	Pyruvate levels	pyruvate measurement	-	• 11340 South Asian		3	FTP Download
								• 102633 European
Karjalainen MK	GCST90302034	2024-03-06	Nature	Genome-wide characterization of circulating…	Cholesteryl esters to total lipids ratio in medium HDL	cholesteryl esters:total lipids ratio, high density lipoprotein cholesterol measurement	-	• 4435 East Asian		37	FTP Download
								• 11340 South Asian
								• 120241 European
Karjalainen MK	GCST90302035	2024-03-06	Nature	Genome-wide characterization of circulating…	Free cholesterol in medium HDL	free cholesterol in medium HDL measurement	-	• 4435 East Asian		30	FTP Download
								• 11340 South Asian
								• 120241 European
Karjalainen MK	GCST90302036	2024-03-06	Nature	Genome-wide characterization of circulating…	Free cholesterol to total lipids ratio in medium HDL	free cholesterol:total lipids ratio, high density lipoprotein cholesterol measurement	-	• 4435 East Asian		27	FTP Download
								• 11340 South Asian
								• 120241 European
Karjalainen MK	GCST90302037	2024-03-06	Nature	Genome-wide characterization of circulating…	Total lipids in medium HDL	total lipids in medium HDL measurement	-	• 4435 East Asian		32	FTP Download
								• 11340 South Asian
								• 120241 European
Karjalainen MK	GCST90302038	2024-03-06	Nature	Genome-wide characterization of circulating…	Concentration of medium HDL particles	high density lipoprotein cholesterol measurement	-	• 4435 East Asian		32	FTP Download
								• 11340 South Asian
								• 120241 European
Karjalainen MK	GCST90302039	2024-03-06	Nature	Genome-wide characterization of circulating…	Phospholipids in medium HDL	phospholipids in medium HDL measurement	-	• 4435 East Asian		34	FTP Download
								• 11340 South Asian
								• 120241 European
Karjalainen MK	GCST90302040	2024-03-06	Nature	Genome-wide characterization of circulating…	Phospholipids to total lipids ratio in medium HDL	phospholipids:total lipids ratio, high density lipoprotein cholesterol measurement	-	• 4435 East Asian		20	FTP Download
								• 11340 South Asian
								• 120241 European
Karjalainen MK	GCST90302041	2024-03-06	Nature	Genome-wide characterization of circulating…	Triglycerides in medium HDL	triglycerides in medium HDL measurement	-	• 4435 East Asian		39	FTP Download
								• 11340 South Asian
								• 120241 European
Karjalainen MK	GCST90302042	2024-03-06	Nature	Genome-wide characterization of circulating…	Triglycerides to total lipids ratio in medium HDL	triglycerides:total lipids ratio, high density lipoprotein cholesterol measurement	-	• 4435 East Asian		45	FTP Download
								• 11340 South Asian
								• 120241 European
Karjalainen MK	GCST90302043	2024-03-06	Nature	Genome-wide characterization of circulating…	Total cholesterol in medium LDL	total cholesterol in medium LDL	-	• 4435 East Asian		52	FTP Download
								• 11340 South Asian
								• 120241 European
Karjalainen MK	GCST90302020	2024-03-06	Nature	Genome-wide characterization of circulating…	Total cholesterol to total lipids ratio in large VLDL	very low density lipoprotein cholesterol measurement, cholesterol:total lipids ratio	-	• 4435 East Asian		20	FTP Download
								• 11340 South Asian
								• 120241 European
Karjalainen MK	GCST90301995	2024-03-06	Nature	Genome-wide characterization of circulating…	Total cholesterol in large HDL	total cholesterol change measurement, high density lipoprotein cholesterol measurement	-	• 4435 East Asian		57	FTP Download
								• 11340 South Asian
								• 120241 European
Karjalainen MK	GCST90301996	2024-03-06	Nature	Genome-wide characterization of circulating…	Total cholesterol to total lipids ratio in large HDL	cholesterol:total lipids ratio, high density lipoprotein cholesterol measurement	-	• 4435 East Asian		38	FTP Download
								• 11340 South Asian
								• 120241 European
Karjalainen MK	GCST90301997	2024-03-06	Nature	Genome-wide characterization of circulating…	Cholesterol esters in large HDL	cholesterol esters in large HDL measurement	-	• 4435 East Asian		56	FTP Download
								• 11340 South Asian
								• 120241 European
Karjalainen MK	GCST90301998	2024-03-06	Nature	Genome-wide characterization of circulating…	Cholesteryl esters to total lipids ratio in large HDL	cholesteryl esters:total lipids ratio, high density lipoprotein cholesterol measurement	-	• 4435 East Asian		31	FTP Download
								• 11340 South Asian
								• 120241 European
Karjalainen MK	GCST90301999	2024-03-06	Nature	Genome-wide characterization of circulating…	Free cholesterol in large HDL	free cholesterol in large HDL measurement	-	• 4435 East Asian		58	FTP Download
								• 11340 South Asian
								• 120241 European
Karjalainen MK	GCST90302000	2024-03-06	Nature	Genome-wide characterization of circulating…	Free cholesterol to total lipids ratio in large HDL	free cholesterol:total lipids ratio, high density lipoprotein cholesterol measurement	-	• 4435 East Asian		36	FTP Download
								• 11340 South Asian
								• 120241 European
Karjalainen MK	GCST90302001	2024-03-06	Nature	Genome-wide characterization of circulating…	Total lipids in large HDL	total lipids in large HDL	-	• 4435 East Asian		53	FTP Download
								• 11340 South Asian
								• 120241 European
Karjalainen MK	GCST90302002	2024-03-06	Nature	Genome-wide characterization of circulating…	Concentration of large HDL particles	high density lipoprotein cholesterol measurement	-	• 4435 East Asian		54	FTP Download
								• 11340 South Asian
								• 120241 European
Karjalainen MK	GCST90302003	2024-03-06	Nature	Genome-wide characterization of circulating…	Phospholipids in large HDL	phospholipids in large HDL measurement	-	• 4435 East Asian		52	FTP Download
								• 11340 South Asian
								• 120241 European
Karjalainen MK	GCST90302004	2024-03-06	Nature	Genome-wide characterization of circulating…	Phospholipids to total lipids ratio in large HDL	phospholipids:total lipids ratio, high density lipoprotein cholesterol measurement	-	• 4435 East Asian		29	FTP Download
								• 11340 South Asian
								• 120241 European
Karjalainen MK	GCST90302005	2024-03-06	Nature	Genome-wide characterization of circulating…	Triglycerides in large HDL	triglycerides in large HDL measurement	-	• 4435 East Asian		24	FTP Download
								• 11340 South Asian
								• 120241 European
Karjalainen MK	GCST90302006	2024-03-06	Nature	Genome-wide characterization of circulating…	Triglycerides to total lipids ratio in large HDL	triglycerides:total lipids ratio, high density lipoprotein cholesterol measurement	-	• 4435 East Asian		38	FTP Download
								• 11340 South Asian
								• 120241 European
Karjalainen MK	GCST90302007	2024-03-06	Nature	Genome-wide characterization of circulating…	Total cholesterol in large LDL	total cholesterol in large LDL	-	• 4435 East Asian		51	FTP Download
								• 11340 South Asian
								• 120241 European
Karjalainen MK	GCST90302008	2024-03-06	Nature	Genome-wide characterization of circulating…	Total cholesterol to total lipids ratio in large LDL	cholesterol:total lipids ratio, low density lipoprotein cholesterol measurement	-	• 4435 East Asian		43	FTP Download
								• 11340 South Asian
								• 120241 European
Karjalainen MK	GCST90302009	2024-03-06	Nature	Genome-wide characterization of circulating…	Cholesterol esters in large LDL	cholesterol esters in large LDL measurement	-	• 4435 East Asian		52	FTP Download
								• 11340 South Asian
								• 120241 European
Karjalainen MK	GCST90302010	2024-03-06	Nature	Genome-wide characterization of circulating…	Cholesteryl esters to total lipids ratio in large LDL	low density lipoprotein cholesterol measurement, cholesteryl esters:total lipids ratio	-	• 4435 East Asian		38	FTP Download
								• 11340 South Asian
								• 120241 European
Karjalainen MK	GCST90302011	2024-03-06	Nature	Genome-wide characterization of circulating…	Free cholesterol in large LDL	free cholesterol in large LDL measurement	-	• 4435 East Asian		58	FTP Download
								• 11340 South Asian
								• 120241 European
Karjalainen MK	GCST90302012	2024-03-06	Nature	Genome-wide characterization of circulating…	Free cholesterol to total lipids ratio in large LDL	low density lipoprotein cholesterol measurement, free cholesterol:total lipids ratio	-	• 4435 East Asian		49	FTP Download
								• 11340 South Asian
								• 120241 European
Karjalainen MK	GCST90302013	2024-03-06	Nature	Genome-wide characterization of circulating…	Total lipids in large LDL	total lipids in large LDL	-	• 4435 East Asian		53	FTP Download
								• 11340 South Asian
								• 120241 European
Karjalainen MK	GCST90302014	2024-03-06	Nature	Genome-wide characterization of circulating…	Concentration of large LDL particles	low density lipoprotein cholesterol measurement	-	• 4435 East Asian		53	FTP Download
								• 11340 South Asian
								• 120241 European
Karjalainen MK	GCST90302015	2024-03-06	Nature	Genome-wide characterization of circulating…	Phospholipids in large LDL	phospholipids in large LDL measurement	-	• 4435 East Asian		52	FTP Download
								• 11340 South Asian
								• 120241 European
Karjalainen MK	GCST90302016	2024-03-06	Nature	Genome-wide characterization of circulating…	Phospholipids to total lipids ratio in large LDL	low density lipoprotein cholesterol measurement, phospholipids:total lipids ratio	-	• 4435 East Asian		54	FTP Download
								• 11340 South Asian
								• 120241 European
Karjalainen MK	GCST90302017	2024-03-06	Nature	Genome-wide characterization of circulating…	Triglycerides in large LDL	triglycerides in large LDL measurement	-	• 4435 East Asian		45	FTP Download
								• 11340 South Asian
								• 120241 European
Karjalainen MK	GCST90302018	2024-03-06	Nature	Genome-wide characterization of circulating…	Triglycerides to total lipids ratio in large LDL	triglycerides:total lipids ratio, low density lipoprotein cholesterol measurement	-	• 4435 East Asian		31	FTP Download
								• 11340 South Asian
								• 120241 European
Karjalainen MK	GCST90302019	2024-03-06	Nature	Genome-wide characterization of circulating…	Total Cholesterol in large VLDL	total cholesterol in large VLDL	-	• 4435 East Asian		41	FTP Download
								• 11340 South Asian
								• 120241 European
Karjalainen MK	GCST90301970	2024-03-06	Nature	Genome-wide characterization of circulating…	Total cholesterol in HDL3	total cholesterol measurement, high density lipoprotein cholesterol measurement	-	• 4435 East Asian		29	FTP Download
								• 11340 South Asian
								• 120241 European
Karjalainen MK	GCST90301971	2024-03-06	Nature	Genome-wide characterization of circulating…	Total cholesterol levels in HDL	total cholesterol measurement, high density lipoprotein cholesterol measurement	-	• 4435 East Asian		59	FTP Download
								• 11340 South Asian
								• 120241 European
Karjalainen MK	GCST90301972	2024-03-06	Nature	Genome-wide characterization of circulating…	Mean diameter of HDL particles	high density lipoprotein particle size measurement	-	• 4435 East Asian		61	FTP Download
								• 11340 South Asian
								• 120241 European
Karjalainen MK	GCST90301973	2024-03-06	Nature	Genome-wide characterization of circulating…	Triglyceride levels in HDL	triglyceride measurement, high density lipoprotein cholesterol measurement	-	• 4435 East Asian		34	FTP Download
								• 11340 South Asian
								• 120241 European
Karjalainen MK	GCST90301974	2024-03-06	Nature	Genome-wide characterization of circulating…	Histidine levels	histidine measurement	-	• 4435 East Asian		18	FTP Download
								• 11340 South Asian
								• 120241 European
Karjalainen MK	GCST90301975	2024-03-06	Nature	Genome-wide characterization of circulating…	Total Cholesterol in IDL	total cholesterol in IDL	-	• 4435 East Asian		58	FTP Download
								• 11340 South Asian
								• 120241 European
Karjalainen MK	GCST90301976	2024-03-06	Nature	Genome-wide characterization of circulating…	Cholesteryl esters to total lipids ratio in IDL	cholesteryl esters:total lipids ratio, intermediate density lipoprotein measurement	-	• 4435 East Asian		32	FTP Download
								• 11340 South Asian
								• 120241 European
Karjalainen MK	GCST90301977	2024-03-06	Nature	Genome-wide characterization of circulating…	Cholesterol esters in IDL	esterified cholesterol measurement, intermediate density lipoprotein measurement	-	• 4435 East Asian		57	FTP Download
								• 11340 South Asian
								• 120241 European
Karjalainen MK	GCST90301978	2024-03-06	Nature	Genome-wide characterization of circulating…	Cholesteryl esters to total lipids ratio in IDL	cholesteryl esters:total lipids ratio, intermediate density lipoprotein measurement	-	• 4435 East Asian		23	FTP Download
								• 11340 South Asian
								• 120241 European
Karjalainen MK	GCST90301979	2024-03-06	Nature	Genome-wide characterization of circulating…	Free cholesterol in IDL	free cholesterol in IDL measurement	-	• 4435 East Asian		61	FTP Download
								• 11340 South Asian
								• 120241 European
Karjalainen MK	GCST90301980	2024-03-06	Nature	Genome-wide characterization of circulating…	Free cholesterol to total lipids ratio in IDL	free cholesterol:total lipids ratio, intermediate density lipoprotein measurement	-	• 4435 East Asian		44	FTP Download
								• 11340 South Asian
								• 120241 European
Karjalainen MK	GCST90301981	2024-03-06	Nature	Genome-wide characterization of circulating…	Total lipids in IDL	total lipids in IDL	-	• 4435 East Asian		56	FTP Download
								• 11340 South Asian
								• 120241 European
Karjalainen MK	GCST90301982	2024-03-06	Nature	Genome-wide characterization of circulating…	Concentration of IDL particles	intermediate density lipoprotein measurement	-	• 4435 East Asian		57	FTP Download
								• 11340 South Asian
								• 120241 European
Karjalainen MK	GCST90301983	2024-03-06	Nature	Genome-wide characterization of circulating…	Phospholipids in IDL	phospholipids in IDL measurement	-	• 4435 East Asian		56	FTP Download
								• 11340 South Asian
								• 120241 European
Karjalainen MK	GCST90301984	2024-03-06	Nature	Genome-wide characterization of circulating…	Phospholipids to total lipids ratio in IDL	phospholipids:total lipids ratio, intermediate density lipoprotein measurement	-	• 4435 East Asian		29	FTP Download
								• 11340 South Asian
								• 120241 European
Karjalainen MK	GCST90301985	2024-03-06	Nature	Genome-wide characterization of circulating…	Triglycerides in IDL	triglycerides in IDL measurement	-	• 4435 East Asian		46	FTP Download
								• 11340 South Asian
								• 120241 European
Karjalainen MK	GCST90301986	2024-03-06	Nature	Genome-wide characterization of circulating…	Triglycerides to total lipids ratio in IDL	triglycerides:total lipids ratio, intermediate density lipoprotein measurement	-	• 4435 East Asian		38	FTP Download
								• 11340 South Asian
								• 120241 European
Karjalainen MK	GCST90301987	2024-03-06	Nature	Genome-wide characterization of circulating…	Isoleucine levels	isoleucine measurement	-	• 4435 East Asian		23	FTP Download
								• 11340 South Asian
								• 120241 European
Karjalainen MK	GCST90301988	2024-03-06	Nature	Genome-wide characterization of circulating…	Linoleic acid (18:2) levels	linoleic acid measurement	-	• 4435 East Asian		51	FTP Download
								• 11340 South Asian
								• 120241 European
Karjalainen MK	GCST90301989	2024-03-06	Nature	Genome-wide characterization of circulating…	Ratio of 18:2 linoleic acid to total fatty acids	fatty acid measurement, linoleic acid measurement	-	• 4435 East Asian		23	FTP Download
								• 11340 South Asian
								• 120241 European
Karjalainen MK	GCST90301990	2024-03-06	Nature	Genome-wide characterization of circulating…	Lactate levels	lactate measurement	-	• 4435 East Asian		4	FTP Download
								• 11340 South Asian
								• 120241 European
Karjalainen MK	GCST90301991	2024-03-06	Nature	Genome-wide characterization of circulating…	Total cholesterol levels in LDL	total cholesterol measurement, low density lipoprotein cholesterol measurement	-	• 4435 East Asian		52	FTP Download
								• 11340 South Asian
								• 120241 European
Karjalainen MK	GCST90301992	2024-03-06	Nature	Genome-wide characterization of circulating…	Mean diameter of LDL particles	low density lipoprotein particle size measurement	-	• 4435 East Asian		27	FTP Download
								• 11340 South Asian
								• 120241 European
Karjalainen MK	GCST90301993	2024-03-06	Nature	Genome-wide characterization of circulating…	Triglyceride levels in LDL	triglyceride measurement, low density lipoprotein cholesterol measurement	-	• 4435 East Asian		46	FTP Download
								• 11340 South Asian
								• 120241 European
Karjalainen MK	GCST90301994	2024-03-06	Nature	Genome-wide characterization of circulating…	Leucine levels	leucine measurement	-	• 4435 East Asian		17	FTP Download
								• 11340 South Asian
								• 120241 European
Karjalainen MK	GCST90302044	2024-03-06	Nature	Genome-wide characterization of circulating…	Total cholesterol to total lipids ratio in medium LDL	cholesterol:total lipids ratio, low density lipoprotein cholesterol measurement	-	• 4435 East Asian		42	FTP Download
								• 11340 South Asian
								• 120241 European
Karjalainen MK	GCST90302045	2024-03-06	Nature	Genome-wide characterization of circulating…	Cholesterol esters in medium LDL	cholesterol esters in medium LDL measurement	-	• 4435 East Asian		51	FTP Download
								• 11340 South Asian
								• 120241 European
Karjalainen MK	GCST90302046	2024-03-06	Nature	Genome-wide characterization of circulating…	Cholesteryl esters to total lipids ratio in medium LDL	low density lipoprotein cholesterol measurement, cholesteryl esters:total lipids ratio	-	• 4435 East Asian		40	FTP Download
								• 11340 South Asian
								• 120241 European
Karjalainen MK	GCST90302047	2024-03-06	Nature	Genome-wide characterization of circulating…	Free cholesterol in medium LDL	free cholesterol in medium LDL measurement	-	• 4435 East Asian		50	FTP Download
								• 11340 South Asian
								• 120241 European
Karjalainen MK	GCST90302048	2024-03-06	Nature	Genome-wide characterization of circulating…	Free cholesterol to total lipids ratio in medium LDL	low density lipoprotein cholesterol measurement, free cholesterol:total lipids ratio	-	• 4435 East Asian		52	FTP Download
								• 11340 South Asian
								• 120241 European
Karjalainen MK	GCST90302049	2024-03-06	Nature	Genome-wide characterization of circulating…	Total lipid levels in medium LDL	low density lipoprotein cholesterol measurement, lipid measurement	-	• 4435 East Asian		53	FTP Download
								• 11340 South Asian
								• 120241 European
Karjalainen MK	GCST90302050	2024-03-06	Nature	Genome-wide characterization of circulating…	Concentration of medium LDL particles	low density lipoprotein cholesterol measurement	-	• 4435 East Asian		52	FTP Download
								• 11340 South Asian
								• 120241 European
Karjalainen MK	GCST90302051	2024-03-06	Nature	Genome-wide characterization of circulating…	Phospholipids in medium LDL	phospholipids in medium LDL measurement	-	• 4435 East Asian		55	FTP Download
								• 11340 South Asian
								• 120241 European
Karjalainen MK	GCST90302103	2024-03-06	Nature	Genome-wide characterization of circulating…	Sphingomyelins levels	sphingomyelin measurement	-	• 4435 East Asian		48	FTP Download
								• 11340 South Asian
								• 110896 European
Karjalainen MK	GCST90302104	2024-03-06	Nature	Genome-wide characterization of circulating…	Total cholesterol in small VLDL	total cholesterol in small VLDL	-	• 4435 East Asian		56	FTP Download
								• 11340 South Asian
								• 120241 European
Karjalainen MK	GCST90302105	2024-03-06	Nature	Genome-wide characterization of circulating…	Total cholesterol to total lipids ratio in small VLDL	very low density lipoprotein cholesterol measurement, cholesterol:total lipids ratio	-	• 4435 East Asian		35	FTP Download
								• 11340 South Asian
								• 120241 European
Karjalainen MK	GCST90302106	2024-03-06	Nature	Genome-wide characterization of circulating…	Cholesterol esters in small VLDL	very low density lipoprotein cholesterol measurement, esterified cholesterol measurement	-	• 4435 East Asian		48	FTP Download
								• 11340 South Asian
								• 120241 European
Karjalainen MK	GCST90302107	2024-03-06	Nature	Genome-wide characterization of circulating…	Cholesteryl esters to total lipids ratio in small VLDL	very low density lipoprotein cholesterol measurement, cholesteryl esters:total lipids ratio	-	• 4435 East Asian		33	FTP Download
								• 11340 South Asian
								• 120241 European
Karjalainen MK	GCST90302108	2024-03-06	Nature	Genome-wide characterization of circulating…	Free cholesterol in small VLDL	free cholesterol in small VLDL measurement	-	• 4435 East Asian		55	FTP Download
								• 11340 South Asian
								• 120241 European
Karjalainen MK	GCST90302109	2024-03-06	Nature	Genome-wide characterization of circulating…	Free cholesterol to total lipids ratio in small VLDL	very low density lipoprotein cholesterol measurement, free cholesterol:total lipids ratio	-	• 4435 East Asian		22	FTP Download
								• 11340 South Asian
								• 120241 European
Karjalainen MK	GCST90302110	2024-03-06	Nature	Genome-wide characterization of circulating…	Total lipids in small VLDL	total lipids in small VLDL	-	• 4435 East Asian		55	FTP Download
								• 11340 South Asian
								• 120241 European
Karjalainen MK	GCST90302111	2024-03-06	Nature	Genome-wide characterization of circulating…	Concentration of small VLDL particles	very low density lipoprotein cholesterol measurement	-	• 4435 East Asian		55	FTP Download
								• 11340 South Asian
								• 120241 European
Karjalainen MK	GCST90302112	2024-03-06	Nature	Genome-wide characterization of circulating…	Phospholipids in small VLDL	phospholipids in VLDL measurement	-	• 4435 East Asian		56	FTP Download
								• 11340 South Asian
								• 120241 European
Karjalainen MK	GCST90302113	2024-03-06	Nature	Genome-wide characterization of circulating…	Phospholipids to total lipids ratio in small VLDL	very low density lipoprotein cholesterol measurement, phospholipids:total lipids ratio	-	• 4435 East Asian		32	FTP Download
								• 11340 South Asian
								• 120241 European
Karjalainen MK	GCST90302114	2024-03-06	Nature	Genome-wide characterization of circulating…	Triglycerides in small VLDL	triglycerides in small VLDL measurement	-	• 4435 East Asian		52	FTP Download
								• 11340 South Asian
								• 120241 European
Karjalainen MK	GCST90302115	2024-03-06	Nature	Genome-wide characterization of circulating…	Triglycerides to total lipids ratio in small VLDL	triglycerides:total lipids ratio, very low density lipoprotein cholesterol measurement	-	• 4435 East Asian		43	FTP Download
								• 11340 South Asian
								• 120241 European
Karjalainen MK	GCST90302116	2024-03-06	Nature	Genome-wide characterization of circulating…	Ratio of triglycerides to phosphoglycerides	triglyceride measurement, phospholipid measurement	-	• 4435 East Asian		49	FTP Download
								• 11340 South Asian
								• 120241 European
Karjalainen MK	GCST90302117	2024-03-06	Nature	Genome-wide characterization of circulating…	Total cholines levels	choline measurement	-	• 4435 East Asian		44	FTP Download
								• 11340 South Asian
								• 120241 European
Karjalainen MK	GCST90302118	2024-03-06	Nature	Genome-wide characterization of circulating…	Total fatty acids	fatty acid measurement	-	• 4435 East Asian		45	FTP Download
								• 11340 South Asian
								• 120241 European
Karjalainen MK	GCST90302120	2024-03-06	Nature	Genome-wide characterization of circulating…	Tyrosine levels	tyrosine measurement	-	• 4435 East Asian		20	FTP Download
								• 11340 South Asian
								• 120241 European
Karjalainen MK	GCST90302121	2024-03-06	Nature	Genome-wide characterization of circulating…	Estimated degree of unsaturation	fatty acid measurement	-	• 4435 East Asian		21	FTP Download
								• 11340 South Asian
								• 120241 European
Karjalainen MK	GCST90302122	2024-03-06	Nature	Genome-wide characterization of circulating…	Valine levels	valine measurement	-	• 4435 East Asian		14	FTP Download
								• 11340 South Asian
								• 120241 European
Karjalainen MK	GCST90302123	2024-03-06	Nature	Genome-wide characterization of circulating…	Total cholesterol levels in VLDL	total cholesterol measurement, very low density lipoprotein cholesterol measurement	-	• 4435 East Asian		52	FTP Download
								• 11340 South Asian
								• 120241 European
Karjalainen MK	GCST90302125	2024-03-06	Nature	Genome-wide characterization of circulating…	Triglyceride levels in VLDL	triglyceride measurement, very low density lipoprotein cholesterol measurement	-	• 4435 East Asian		44	FTP Download
								• 11340 South Asian
								• 120241 European
Karjalainen MK	GCST90302126	2024-03-06	Nature	Genome-wide characterization of circulating…	Total cholesterol levels in very large HDL	total cholesterol measurement, high density lipoprotein cholesterol measurement	-	• 4435 East Asian		55	FTP Download
								• 11340 South Asian
								• 120241 European
Karjalainen MK	GCST90302127	2024-03-06	Nature	Genome-wide characterization of circulating…	Total cholesterol to total lipids ratio in very large HDL	cholesterol:total lipids ratio, high density lipoprotein cholesterol measurement	-	• 4435 East Asian		33	FTP Download
								• 11340 South Asian
								• 120241 European
Karjalainen MK	GCST90302119	2024-03-06	Nature	Genome-wide characterization of circulating…	Total phosphoglycerides levels	phosphoglycerides measurement	-	• 4435 East Asian		44	FTP Download
								• 11340 South Asian
								• 120241 European
Karjalainen MK	GCST90302124	2024-03-06	Nature	Genome-wide characterization of circulating…	Mean diameter of VLDL particles	very low density lipoprotein particle size measurement	-	• 4435 East Asian		40	FTP Download
								• 11340 South Asian
								• 120241 European
